# Supplementary material for: JNK pathway restricts DENV2, ZIKV and CHIKV infection by activating complement and apoptosis in mosquito salivary glands
Source: PLoS Pathog. 2020 Aug 10;16(8):e1008754. doi: 10.1371/journal.ppat.1008754 (PMC7444518; doi:10.1371/journal.ppat.1008754)
Supplement: S1 Table — (Excel sheet). (XLSX) [file ppat.1008754.s002.xlsx]

## Sheet: A. aegypti 3 viruses
Aedes aegypti									Drosophila melanogaster Ortholog
Gene Accession	DENV2_Log2FoldChange	ZIKV_Log2FoldChange	CHIKV_Log2FoldChange	Gene Name or Description	Functional Annotation	VectorBase Description	BLAST2GO Description (NCBI nr database)	Signal Peptide	Description	FlyBase ID	Locus	Locus Tag	% Identity	Evalue
AAEL016967	2.4267		-1.02999	Xanthine uracil permease	TRP		xanthine uracil transporter	N	CG6293, isoform A	FBgn0037807	CG6293	CG6293	76.33	0
AAEL000496	2.06163			Peroxidase	RSM		peroxidase skpo-1-like	Y	curly Su	FBgn0038511	cysu	CG5873	21.96	1e-17
AAEL006483	1.92012			Salivary secreted peptide	UNK		salivary secreted peptide	Y	uncharacterized protein CG13102, isoform A	FBgn0032088	CG13102	CG13102	26.36	0.017
AAEL005676	1.7365	1.34003		Adenosine deaminase	BF	adenosine deaminase [Source:VB Community Annotation]	salivary adenosine deaminase	N	adenosine deaminase-related growth factor A, isoform B	FBgn0036752	Adgf-A	CG5992	51.39	6e-174
AAEL003732	1.69641	0.798888	0.81105		UNK	ribonuclease UK114, putative	AAEL003732-PA	N
AAEL003864	1.63715		0.802058	Uracil-DNA degradating factor	RTT		AAEL003864-PA	N	Uracil-DNA degrading factor, isoform C	FBgn0039226	Ude	CG18410	62.94	1e-115
AAEL012545	1.5412	1.03804		proliferating cell nuclear antigen	RTT	Proliferating cell nuclear antigen [Source:UniProtKB/TrEMBL;Acc:Q4PKD7]	proliferating cell nuclear antigen	N	proliferating cell nuclear antigen, isoform B	FBgn0005655	PCNA	CG9193	87.26	4e-173
AAEL002273	1.5291		2.45174	Snake-like	IMM	trypsin, putative [Source:VB Community Annotation]	serine protease snake-like	Y	snake, isoform A	FBgn0003450	snk	CG7996	36.74	9e-65
AAEL008692	1.50216	0.756876		Barrier-to-autointegration factor	RTT	barrier-to-autointegration factor, putative [Source:VB Community Annotation]	Barrier-to-autointegration factor	N	barrier to autointegration factor, isoform A	FBgn0031977	baf	CG7380	78.89	2e-49
AAEL000566	1.38926		2.25281	Secreted protein	UNK		conserved secreted	N	CG4269, isoform A	FBgn0034741	CG4269	CG4269	39.64	2e-20
AAEL000515	1.37588	0.72694	0.802942	Juvenile hormone inducible protein	IMM/RTT	juvenile hormone-inducible protein, putative [Source:VB Community Annotation]	juvenile hormone-inducible	N	CG5126	FBgn0031320	CG5126	CG5126	33.55	6e-82
AAEL006329	1.3563			Yellow-k	UNK		yellow-k	Y	yellow-k	FBgn0036504	yellow-k	CG7463	26.11	6e-23
AAEL002581	1.29016			structural maintenance of chromosomes 6 smc6 [Source:VB Community Annotation]	RTT	structural maintenance of chromosomes 6 smc6 [Source:VB Community Annotation]	structural maintenance of chromosomes 6	N	java no jive	FBgn0266282	jnj	CG5524	30.9	1e-147
AAEL001511	1.2834		1.98667		UNK		conserved secreted precursor	Y
AAEL001288	1.22289		3.50344	CYP9M5	RSM	cytochrome P450 [Source:VB Community Annotation]	cytochrome P450	N	cytochrome P450-9b2	FBgn0015039	Cyp9b2	CG4486	37.26	9e-120
AAEL014348	1.21576		2.31194	Caspase8	APO	caspase (short) [Source:VB Community Annotation]	caspase-1-like isoform X2	N	death related ICE-like caspase	FBgn0019972	Drice	CG7788	50.79	3e-87
AAEL013262	1.1883		1.40361	endochitinase EP3-like	PROT		endochitinase EP3-like	N
AAEL018118	1.16949	0.863385	0.975095	lodestar	RTT		transcription termination factor 2 isoform X1	N	lodestar	FBgn0002542	lds	CG2684	46.14	0
AAEL007606	1.1359		1.25572		UNK		AAEL007606-PA	N
AAEL013351	1.10216		2.21962	L2efl	RSM	lethal(2)essential for life protein, l2efl [Source:VB Community Annotation]	lethal(2)essential for life-like	N	lethal (2) essential for life, isoform A	FBgn0011296	l(2)efl	CG4533	42.33	1e-43
AAEL014363	1.07965		2.50054		UNK		AAEL014363-PA	N
AAEL006080	1.0588			Spindle	RSM	DNA repair protein rad51 [Source:VB Community Annotation]	DNA repair RAD51	N	spindle A, isoform A	FBgn0003479	spn-A	CG7948	70	8e-162
AAEL007541	1.05617			DNA polymerase subunit	RTT	DNA polymerase delta small subunit [Source:VB Community Annotation]	DNA polymerase delta small subunit-like isoform X1	N	uncharacterized protein CG12018	FBgn0027903	CG12018	CG12018	51.72	5e-158
AAEL016998	1.05447			Stall	PROT		A disintegrin and metallo ase with thrombospondin motifs 16-like	N	stall, isoform E	FBgn0086408	stl	CG3622	30.9	5e-54
AAEL012543	1.03983		-0.837218	myosin motor	CS	myosin motor, putative [Source:VB Community Annotation]	myosin motor	N	CG3213	FBgn0031545	CG3213	CG3213	38.82	9e-51
AAEL011067	1.03757			tubulin-specific chaperone	RTT	tubulin-specific chaperone, putative [Source:VB Community Annotation]	tubulin-specific chaperone	N	Tubulin-specific chaperone E, isoform B	FBgn0033055	Tbce	CG7861	40.46	4e-72
AAEL000550	1.03688			helicase interacting protein	RTT	werner helicase interacting protein [Source:VB Community Annotation]	ATPase WRNIP1	N	replication factor C subunit 4	FBgn0260985	RfC4	CG14999	26.58	2e-08
AAEL012226	1.03251				UNK		AAEL012226-PA	Y
AAEL008569	1.03045	0.944664		Ringmaker	CS		TPPP family CG45057-like isoform X2	N	ringmaker, isoform A	FBgn0266417	CG45057	CG45057	75.95	3e-86
AAEL010307	1.01666			mucin 68D	BF		glutamic acid-rich -like isoform X2	Y	mucin 68D	FBgn0036203	Muc68D	CG6004	36.67	1e-07
AAEL013280	0.998413			rho guanine exchange factor	DIV	rho guanine exchange factor [Source:VB Community Annotation]	rho guanine exchange factor	N	Rho guanine nucleotide exchange factor 3, isoform E	FBgn0264707	RhoGEF3	CG43976	38.98	0
AAEL014250	0.995093			insect replication a	RTT	insect replication protein a [Source:VB Community Annotation]	insect replication a	N	replication protein A2, isoform A	FBgn0032906	RPA2	CG9273	50.2	2e-80
AAEL006794	0.989163	0.534261	0.502704	Dicer 2	IMM	dicer-2 [Source:VB Community Annotation]	endoribonuclease Dicer 2	N	Dicer-2, isoform A	FBgn0034246	Dcr-2	CG6493	33.87	0
AAEL009126	0.978557		3.36856	CYP6N6	RSM	cytochrome P450 [Source:VB Community Annotation]	probable cytochrome P450 6a14	Y	Cyp6a14, isoform C	FBgn0033302	Cyp6a14	CG8687	46.55	1e-165
AAEL000416	0.968791			mucin	BF		mucin-17-like isoform X1	N
AAEL011042	0.962918		3.06108		UNK		AAEL011042-PA	Y
AAEL001512	0.946851		1.76682		UNK		AAEL001512-PA	N
AAEL014906	0.945399		2.37532	Scribble/LRR	IMM/BF	LAP4 protein, putative (Scribble protein, putative) [Source:VB Community Annotation]	leucine-rich repeat-containing 47	N	scribbled, isoform C	FBgn0263289	scrib	CG43398	33.65	5e-23
AAEL014055	0.921395			thymidine kinase	DIV	thymidine kinase [Source:VB Community Annotation]	deoxynucleoside kinase-like isoform X2	N	deoxyribonucleoside kinase, isoform A	FBgn0022338	dnk	CG5452	67.74	3e-124
AAEL006908	0.919397				UNK		PITH domain-containing CG6153	N	CG6153, isoform A	FBgn0032445	CG6153	CG6153	68.25	3e-105
AAEL008710	0.916622		2.11425		UNK		AAEL008710-PA	N
AAEL001856	0.915652		0.664337	Adenosine kinase	DIV	adenosine kinase [Source:VB Community Annotation]	adenosine kinase-like	N	Ady43A	FBgn0026602	Ady43A	CG1851	37.47	5e-61
AAEL011336	0.911741			Mucin related	BF		AAEL011336-PA	Y	mucin related 2B, isoform A	FBgn0025390	Mur2B	CG14796	31.06	3e-07
AAEL006130	0.907576				UNK		AAEL006130-PA	N
AAEL007291	0.906759			replication factor 14kD-subunit	RTT	replication factor A, 14kD-subunit, putative [Source:VB Community Annotation]	replication factor 14kD-subunit	N	replication protein A3, isoform A	FBgn0266421	RPA3	CG15220	39.82	3e-21
AAEL008438	0.874621				UNK		AAEL008438	N
AAEL001809	0.858692		1.91986	lowfat	DIV		limb expression 1 homolog isoform X2	N	lowfat, isoform A	FBgn0032230	lft	CG13139	82.58	1e-165
AAEL013352	0.851181		3.19049	L2efl	RSM	lethal(2)essential for life protein, l2efl [Source:VB Community Annotation]	lethal(2)essential for life-like	N	lethal (2) essential for life, isoform A	FBgn0011296	l(2)efl	CG4533	51.3	2e-62
AAEL013345	0.847984		2.04282	L2efl	RSM	alphaA-crystallin, putative [Source:VB Community Annotation]	lethal(2)essential for life-like	N	lethal (2) essential for life, isoform A	FBgn0011296	l(2)efl	CG4533	40.12	1e-35
AAEL004743	0.846735		1.42071	ATP-binding cassette	TRP	multidrug resistance protein 2 (ATP-binding cassette protein c) [Source:VB Community Annotation]	multidrug resistance-associated 1-like isoform X3	N	Multidrug-Resistance like protein 1, isoform K	FBgn0032456	MRP	CG6214	65.04	0
AAEL008105	0.845003		0.846956	Glutamate cysteine ligase	DIV	glutamate cysteine ligase [Source:VB Community Annotation]	glutamate--cysteine ligase-like	N	Glutamate-cysteine ligase catalytic subunit, isoform B	FBgn0040319	Gclc	CG2259	81.78	0
AAEL012069	0.84204		1.2069	GPXH1	MET	Glutathione peroxidase [Source:UniProtKB/TrEMBL;Acc:Q16N54]	probable phospholipid hydroperoxide glutathione peroxidase isoform X2	N	PHGPx, isoform A	FBgn0035438	PHGPx	CG12013	71.26	2e-89
AAEL010081	0.83918			phosphatidylinositol glycan anchor biosynthesis	MET		phosphatidylinositol glycan anchor biosynthesis	N	CG2144		CG2144	CG2144	36.36	6e-89
AAEL001548	0.834312		3.44085	Glucosyl-transferase	MET	glucosyl/glucuronosyl transferases [Source:VB Community Annotation]	2-hydroxyacylsphingosine 1-beta-galactosyltransferase-like	Y	UDP-glycosyltransferase 35b	FBgn0026314	Ugt35b	CG6649	41.07	3e-111
AAEL001580	0.82816			otefin	DIV	otefin, putative [Source:VB Community Annotation]	isoform A	N	otefin	FBgn0266420	Ote	CG5581	26.1	3e-12
AAEL003331	0.81204	0.732146		convoluted	IMM		leucine-rich transmembrane	Y	convoluted, isoform A	FBgn0261269	conv	CG8561	50.24	0
AAEL003738	0.805274		3.64645	Ankyrin	IMM		AAEL003738-PA	N	ankyrin 2, isoform N	FBgn0261788	Ank2	CG42734	24.18	1e-08
AAEL001378	0.797355			spermidine synthase	MET	spermine synthase [Source:VB Community Annotation]	spermidine synthase	N	CG4300, isoform B	FBgn0036272	CG4300	CG4300	62.81	2e-172
AAEL013229	0.796942		1.13096	Tubulin alpha chain	CS	Tubulin alpha chain [Source:UniProtKB/TrEMBL;Acc:Q16JS3]	tubulin alpha-1 chain	N	alpha-Tubulin at 84B	FBgn0003884	alphaTub84B	CG1913	99.33	0
AAEL010301	0.789523			cysteine-rich motor neuron 1 -like	DIV		cysteine-rich motor neuron 1 -like	N
AAEL010691	0.786843	0.875676	0.828388	RnrS	RTT	ribonucleoside-diphosphate reductase small chain [Source:VB Community Annotation]	ribonucleoside-diphosphate reductase small chain	N	ribonucleoside diphosphate reductase small subunit	FBgn0011704	RnrS	CG8975	77.55	0
AAEL011254	0.761502		1.20104	aprataxin and PNK-like factor isoform X2	DIV		aprataxin and PNK-like factor isoform X2	N	CG6171, isoform A	FBgn0026737	CG6171	CG6171	59.42	4e-25
AAEL018016	0.759565			histone H1-like	DIV		histone H1-like	N	histone H1	FBgn0051617	His1:CG31617	CG31617	69.62	4e-31
AAEL001312	0.758311		2.42666	CYP9M6	RSM	cytochrome P450 [Source:VB Community Annotation]	cytochrome P450	N	cytochrome P450-9b2	FBgn0015039	Cyp9b2	CG4486	36.26	2e-123
AAEL007557	0.755784		1.66063	asparagine synthetase	MET	asparagine synthetase [Source:VB Community Annotation]	asparagine synthetase B	N	asparagine synthetase	FBgn0270926	AsnS	CG33486	59.93	0
AAEL007595	0.752947		0.538153	p53	APO		cellular tumor antigen p53-like isoform X1	N	p53, isoform A	FBgn0039044	p53	CG33336	34.63	6e-25
AAEL002861	0.740448		1.87562	saccharopine dehydrogenase domain-containing	DIV		saccharopine dehydrogenase domain-containing	N	CG2604, isoform C	FBgn0037298	CG2604	CG2604	62.94	0
AAEL014945	0.736029	0.570643		aprataxin	UNK		aprataxin isoform X2	N	CG5316, isoform A	FBgn0038704	CG5316	CG5316	52.63	1e-38
AAEL017461	0.72875				UNK		AAEL017461-PA	N
AAEL018336	0.695572		1.27325	regulator of cullins 2	DIV		RING-box 2	N	regulator of cullins 2, isoform A	FBgn0044020	Roc2	CG8998	81.42	9e-63
AAEL003261	0.695538		2.13845		UNK		AAEL003261-PA	N
AAEL007275	0.693984			aldo-keto reductase	MET	aldo-keto reductase [Source:VB Community Annotation]	aldo-keto reductase	N	CG2767	FBgn0037537	CG2767	CG2767	36.51	1e-53
AAEL015464	0.693855			histone H1-like	DIV	histone H1, putative [Source:VB Community Annotation]	histone H1-like	N	histone H1	FBgn0051617	His1:CG31617	CG31617	59.48	2e-31
AAEL014204	0.689086			6-phophogluconolactonase	MET	6-phosphogluconolactonase [Source:VB Community Annotation]	probable 6-phosphogluconolactonase	N	uncharacterized protein CG17333	FBgn0030239	CG17333	CG17333	39.46	1e-53
AAEL005417	0.671388		1.80934	annexin x	DIV	annexin x [Source:VB Community Annotation]	annexin B10-like	N	annexin B10, isoform A	FBgn0000084	AnxB10	CG9579	64.15	3e-145
AAEL008719	0.670583			Sm protein G	RTT	Sm protein G, putative [Source:VB Community Annotation]	probable small nuclear ribonucleoprotein G	N	small nuclear ribonucleoprotein G, isoform A	FBgn0261791	SNRPG	CG9742	84.21	2e-44
AAEL003684	0.666286		0.977557	Ku80 DNA helicase	RTT	ku P80 DNA helicase [Source:VB Community Annotation]	X-ray repair cross-complementing 5-like	N	Ku80	FBgn0041627	Ku80	CG18801	25.11	9e-44
AAEL003844	0.664684		1.4059	GALE5	IMM	Galectin [Source:UniProtKB/TrEMBL;Acc:Q17EC8]	galectin-9-like isoform X2	N	galectin, isoform D	FBgn0031213	galectin	CG11372	33.33	2e-12
AAEL000179	0.661868		0.852233	Ubiquitin-conjugating enzyme E2	DIV	ubiquitin-conjugating enzyme E2 l [Source:VB Community Annotation]	Ubiquitin-conjugating enzyme E2 L3	N	ubiquitin conjugating enzyme 10	FBgn0026316	Ubc10	CG5788	78.29	7e-89
AAEL013205	0.65891			DNA repair helicase	RTT	rad25/xp-b DNA repair helicase [Source:VB Community Annotation]	DNA excision repair haywire	N	haywire, isoform A	FBgn0001179	hay	CG8019	82.6	0
AAEL012441	0.656132			vreteno	UNK		AAEL012441-PA	N	vreteno	FBgn0263143	vret	CG4771	21.2	8e-07
AAEL011815	0.650164			Poly-(ADP-ribose) polymerase	RTT	Poly [ADP-ribose] polymerase [Source:UniProtKB/TrEMBL;Acc:Q16NZ4]	poly [ADP-ribose] polymerase-like	N	Poly-(ADP-ribose) polymerase	FBgn0010247	Parp	CG40411	51.78	0
AAEL007444	0.635254			REPTOR-binding partner, isoform A	RTT		cAMP-responsive element-binding -like 2	N	REPTOR-binding partner, isoform A	FBgn0032202	REPTOR-BP	CG18619	67.59	7e-44
AAEL011665	0.628615			transcription factor	RTT		transcription factor	N
AAEL006449	0.610522		1.30248	ser/thr protein kinase-lyk4	DIV	ser/thr protein kinase-lyk4 [Source:VB Community Annotation]	serine threonine kinase	N	tribbles	FBgn0028978	trbl	CG5408	35.43	5e-25
AAEL005220	0.607681			RpL30	RTT	60S ribosomal protein L30 [Source:UniProtKB/TrEMBL;Acc:Q1HR35]	60S ribosomal L30	N	ribosomal protein L30, isoform B	FBgn0086710	RpL30	CG10652	86.49	5e-66
AAEL004112	0.60679		1.56347	TPX2	RSM		peroxiredoxin 1	N	thioredoxin peroxidase 1, isoform B	FBgn0040309	Jafrac1	CG1633	81.15	1e-117
AAEL008500	0.602729			DEAD box ATP-dependent RNA helicase	IMM/RTT	DEAD box ATP-dependent RNA helicase [Source:VB Community Annotation]	ATP-dependent RNA helicase me31b	N	maternal expression at 31B, isoform A	FBgn0004419	me31B	CG4916	85.4	0
AAEL008123	0.594205			TOR	DIV		DNA-dependent kinase catalytic subunit-like	N	target of rapamycin, isoform B	FBgn0021796	Tor	CG5092	25.33	2e-38
AAEL011906	0.593512			histone H1	DIV	histone H1, putative [Source:VB Community Annotation]	histone H1	N	histone H1	FBgn0051617	His1:CG31617	CG31617	53.38	4e-29
AAEL011468	0.588825			protein kinase inhibitor	DIV	protein kinase C inhibitor, putative [Source:VB Community Annotation]	histidine triad nucleotide-binding 1	N	CG2862, isoform A	FBgn0031459	CG2862	CG2862	72.44	5e-65
AAEL010151	0.584401		-0.593084	CYP6N16	RSM	cytochrome P450 [Source:VB Community Annotation]	probable cytochrome P450 6a14	N	Cyp6a14, isoform C	FBgn0033302	Cyp6a14	CG8687	45.67	7e-160
AAEL009129	0.575482	0.78037	1.44692	CYP6Z9	RSM	cytochrome P450 [Source:VB Community Annotation]	probable cytochrome P450 6d4	Y	Cyp6d4	FBgn0039006	Cyp6d4	CG12800	41.06	2e-143
AAEL008723	0.563677		1.40242	HIG1 domain family member 1A	DIV		HIG1 domain family member 1A	N	uncharacterized protein CG17734, isoform A	FBgn0037890	CG17734	CG17734	72.84	2e-36
AAEL007236	0.56084		0.765171	farnesoic acid o-methyltransferase	DIV		farnesoic acid o-methyltransferase	N	uncharacterized protein CG10527	FBgn0034583	CG10527	CG10527	62.84	1e-135
AAEL009681	0.559789		1.08991	rhomboid-like	PROT	Rhomboid-like protein [Source:UniProtKB/TrEMBL;Acc:Q16V56]	rhomboid-related 2-like isoform X2	N	rhomboid-4, isoform A	FBgn0030318	rho-4	CG1697	61.11	4e-164
AAEL011876	0.556867			dre4	RTT		FACT complex subunit spt16-like isoform X1	N	dre4, isoform B	FBgn0002183	dre4	CG1828	73.76	0
AAEL006341	0.55516		-0.571849		UNK		Anopheles gambiae PEST AGAP012808-PA	Y	uncharacterized protein CG16959, isoform B	FBgn0036481	CG16959	CG16959	54.84	0
AAEL012826	0.550835		0.547079	rfa1	RTT	replication factor a 1, rfa1 [Source:VB Community Annotation]	replication A 70 kDa DNA-binding subunit-like	N	replication protein A 70	FBgn0010173	RpA-70	CG9633	56.96	0
AAEL006815	0.546557		1.78142	CYP9J16	RSM	cytochrome P450 [Source:VB Community Annotation]	probable cytochrome P450 9f2	N	Cyp9f2	FBgn0038037	Cyp9f2	CG11466	42.5	7e-153
AAEL010843	0.53074			eLF1	RTT		translation factor SUI1 homolog	N	uncharacterized protein CG17737		CG17737	CG17737	95.45	1e-74
AAEL012390	0.528845		1.42833		UNK		AAEL012390-PA	Y	uncharacterized protein CG12945, isoform D	FBgn0037755	CG12945	CG12945	23.96	5e-19
AAEL003130	0.52781		1.0202		TRP	bcr-associated protein, bap [Source:VB Community Annotation]	B-cell receptor-associated 31-like isoform X3	N	uncharacterized protein CG13887, isoform C	FBgn0035165	CG13887	CG13887	65.52	3e-100
AAEL017251	0.522554			AGO2	IMM		argonaute 2	N	argonaute 2, isoform B	FBgn0087035	AGO2	CG7439	40.77	0
AAEL005662	0.522463		1.04753	NTPase	DIV	adenosine diphosphatase [Source:VB Community Annotation]	nucleoside phosphatase	N	NTPase, isoform A	FBgn0024947	NTPase	CG3059	55.48	0
AAEL014530	0.522054		-0.598327	phosphorylase kinase gamma	DIV		phosphorylase b kinase gamma catalytic skeletal muscle heart isoform-like isoform X4	N	phosphorylase kinase gamma, isoform F	FBgn0011754	PhKgamma	CG1830	80.6	8e-35
AAEL003415	0.505861		0.993628	lamin	CS	lamin [Source:VB Community Annotation]	lamin Dm0-like	N	lamin, isoform A	FBgn0002525	Lam	CG6944	50.24	0
AAEL008054	0.492947		0.776375	scylla	UNK		charybde-like isoform X1	N	scylla, isoform C	FBgn0041094	scyl	CG7590	66.67	2e-42
AAEL003619	0.4904		0.72236	sodium-dependent nutrient amino acid transporter 1-like isoform X2	TRP	sodium/chloride dependent amino acid transporter [Source:VB Community Annotation]	sodium-dependent nutrient amino acid transporter 1-like isoform X2	N	CG1698, isoform A	FBgn0033443	CG1698	CG1698	48.25	0
AAEL003148	0.489663		-0.679851	short-chain dehydrogenase	MET	short-chain dehydrogenase [Source:VB Community Annotation]	short-chain dehydrogenase	N	CG7675, isoform C	FBgn0038610	CG7675	CG7675	50	8e-81
AAEL004522	-0.479028	-0.943951	-0.715582	Gam1	IMM	gambicin anti-microbial peptide [Source:VB Community Annotation]	gambicin	Y
AAEL014246	-0.4878			glucosyl transferase	MET	glucosyl/glucuronosyl transferases [Source:VB Community Annotation]	UDP-glucuronosyltransferase 2B1-like	N	uncharacterized protein CG15661, isoform A	FBgn0034605	CG15661	CG15661	50	4e-171
AAEL009018	-0.490361			CYP6A14	RSM	cytochrome P450 [Source:VB Community Annotation]	cytochrome P450	Y	Cyp6a14, isoform C	FBgn0033302	Cyp6a14	CG8687	38.78	2e-112
AAEL006347	-0.490457	-0.990279	-0.957247	Apyrase	BF	Apyrase Precursor (EC 3.6.1.5)(Adenosine diphosphatase)(ATP-diphosphohydrolase)(ATP-diphosphatase)(ADPase)(Allergen Aed a 1) [Source:VB Community Annotation]	APY_AEDAE ame: Full=Apyrase ame: Full=ATP-diphosphatase Short=ADPase ame: Full=ATP-diphosphohydrolase ame: Full=Adenosine diphosphatase ame: Allergen=Aed a 1 Flags: Precursor	Y	uncharacterized protein CG42249, isoform C	FBgn0259101	CG42249	CG42249	39.27	8e-125
AAEL008928	-0.493662		-0.56679	Kir2A	TRP	inward-rectifying potassium channel [Source:VB Community Annotation]	inwardly rectifying k+ channel	N	inwardly rectifying potassium channel 2, isoform C	FBgn0039081	Irk2	CG4370	72.3	0
AAEL006834	-0.49662		-0.567546	glutamate dehydrogenase	MET	glutamate semialdehyde dehydrogenase [Source:VB Community Annotation]	gamma-glutamyl kinase	N	CG7470, isoform A	FBgn0037146	CG7470	CG7470	79.81	0
AAEL007381	-0.519346	0.588551			UNK		conserved secreted	Y
AAEL001965	-0.520724	0.769944		imaginal disc growth factor 4	DIV	imaginal disc growth factor [Source:VB Community Annotation]	bacteria-responsive 1 1	Y	imaginal disc growth factor 4, isoform B	FBgn0026415	Idgf4	CG1780	55.53	3e-173
AAEL002656	-0.527844	-0.664012		23 kDa secreted salivary	UNK		23 kDa secreted salivary	Y
AAEL006362	-0.527991			aralar1	TRP	mitochondrial solute carrier [Source:VB Community Annotation]	calcium-binding mitochondrial carrier aralar1	N	aralar1, isoform C	FBgn0028646	aralar1	CG2139	76.51	0
AAEL002510	-0.528374			serine cytosolic-like isoform X1	MET	Serine hydroxymethyltransferase [Source:UniProtKB/TrEMBL;Acc:Q17I00]	serine cytosolic-like isoform X1	N	CG3011, isoform A		CG3011	CG3011	65.56	0
AAEL002704	-0.536775	-0.733713		SRPN23	IMM	Serine Protease Inhibitor (serpin) homologue [Source:VB Community Annotation]	salivary serpin	Y	serpin 42Da, isoform I	FBgn0265137	Spn42Da	CG9453	24.07	2e-17
AAEL003600	-0.537307	-0.920544	-0.709231	34 kDa family secreted salivary	UNK		34 kDa family secreted salivary	Y
AAEL007653	-0.549115		-1.28089	allantoinase	PROT	allantoinase [Source:VB Community Annotation]	allantoinase mitochondrial	N	CG6106, isoform A	FBgn0030914	CG6106	CG6106	49.79	2e-149
AAEL013984	-0.55597			farmer	UNK		structural constituent of	Y	farmer, isoform H	FBgn0035612	frm	CG10625	31.71	3e-15
AAEL001998	-0.565213				UNK		AAEL001998-PA	Y
AAEL001414	-0.56819			LRIM9	IMM	leucine-rich immune protein (Short) [Source:VB Community Annotation]	leucine-rich repeat	Y	lambik	FBgn0034083	lbk	CG8434	30.82	8e-09
AAEL007041	-0.571431			LRP1	DIV	low-density lipoprotein receptor (ldl) [Source:VB Community Annotation]	low-density lipo receptor-related 1 isoform X2	N	LDL receptor protein 1, isoform F	FBgn0053087	LRP1	CG33087	47.63	0
AAEL011566	-0.572758	0.563985		axon guidance receptor	DIV	cell adhesion molecule [Source:VB Community Annotation]	axon guidance receptor	Y	Unc-89, isoform H	FBgn0053519	Unc-89	CG33519	22.13	1e-42
AAEL013009	-0.579411			cytochrome c oxidase subunit IV	RSM	cytochrome c oxidase subunit iv [Source:VB Community Annotation]	cytochrome c oxidase subunit IV	N	cytochrome c oxidase subunit 4, isoform B	FBgn0032833	COX4	CG10664	63.27	3e-70
AAEL017451	-0.592382		-0.569204	angiotensin i-converting enzyme	BF	Angiotensin-converting enzyme [Source:UniProtKB/TrEMBL;Acc:J9HF68]	angiotensin i-converting enzyme	Y	angiotensin converting enzyme, isoform B	FBgn0012037	Ance	CG8827	60.84	0
AAEL007889	-0.599036			F-spondin	DIV	F-spondin [Source:VB Community Annotation]	spondin-1-like	N	uncharacterized protein CG17739	FBgn0033710	CG17739	CG17739	44.83	0
AAEL002683	-0.602665		-1.03519	rosy	MET	aldehyde oxidase [Source:VB Community Annotation]	xanthine dehydrogenase-like	N	rosy	FBgn0003308	ry	CG7642	65.04	0
AAEL004120	-0.603057			Niemann-pick type C-2	IMM	Niemann-Pick Type C-2, putative [Source:VB Community Annotation]	MD-2-related lipid-recognition -like	Y	Niemann-Pick type C-2g, isoform A	FBgn0039800	Npc2g	CG11314	41.61	9e-34
AAEL011183	-0.604142	-1.15059		threonine serine-rich mucin	UNK		threonine serine-rich mucin	Y
AAEL017029	-0.623559	0.815611		henna	DIV		phenylalanine hydroxylase	N	henna, isoform A	FBgn0001208	Hn	CG7399	74.67	0
AAEL009081	-0.638746	-1.05606	-1.04291		UNK		AF466593_1 kDa secreted	Y
AAEL009524	-0.64296	-0.679111	-1.04053	Maltase A1	DIG	alpha-amylase [Source:VB Community Annotation]	MALT_AEDAE ame: Full=Probable maltase Flags: Precursor	Y	maltase A1	FBgn0002570	Mal-A1	CG8696	51.85	0
AAEL012509	-0.645658			esterase P	PROT	Carboxylic ester hydrolase (Fragment) [Source:UniProtKB/TrEMBL;Acc:Q16LV6]	venom carboxylesterase-6-like	Y	esterase P	FBgn0000594	Est-P	CG17148	35.92	9e-103
AAEL006890	-0.649741		-0.594349	jabba	UNK		polyQ domain-containing hypothetical conserved	N	jabba, isoform B	FBgn0259682	Jabba	CG42351	33.98	1e-31
AAEL000793	-0.654613	-0.934942	-0.960265	venom allergen	UNK	venom allergen [Source:VB Community Annotation]	venom allergen -like	Y	uncharacterized protein CG32679	FBgn0052679	CG32679	CG32679	38.74	3e-57
AAEL003203	-0.658456		-0.619272	desaturase 1	MET	fatty acid desaturase, putative [Source:VB Community Annotation]	acyl- Delta(11) desaturase-like isoform X2	N	desaturase 1, isoform E	FBgn0086687	Desat1	CG5887	75	0
AAEL007191	-0.661978		-0.988527	amino acid transporter	TRP	amino acid transporter [Source:VB Community Annotation]	amino acid transporter	N	CG7888, isoform B	FBgn0036116	CG7888	CG7888	67.86	0
AAEL005951	-0.669295		-0.707999	lipid storage droplet-1	MET	lipid storage droplets surface binding protein [Source:VB Community Annotation]	lipid storage droplets surface-binding 1-like isoform X4	N	lipid storage droplet-1, isoform B	FBgn0039114	Lsd-1	CG10374	52.63	2e-57
AAEL001863	-0.669326		-0.687387	zinc carboxypeptidase	PROT	zinc carboxypeptidase [Source:VB Community Annotation]	carboxypeptidase B	Y	CG8560, isoform A	FBgn0035781	CG8560	CG8560	56.06	1e-159
AAEL003100	-0.680226	-0.859759	-0.814058	salivary mucin 4	BF		salivary mucin 4	Y
AAEL011325	-0.681637			AKHR	DIV	gonadotropin-releasing hormone receptor [Source:VB Community Annotation]	adipokinetic hormone receptor	N	adipokinetic hormone receptor, isoform B	FBgn0025595	AkhR	CG11325	55.36	4e-82
AAEL017467	-0.689945	-1.29735		Peroxinectin-like	DIV		peroxidase skpo-1	N	Peroxinectin-like	FBgn0261987	Pxt	CG7660	22.1	2e-24
AAEL001108	-0.696541			protein kinase C 53E	DIV/apo	Protein kinase C [Source:UniProtKB/TrEMBL;Acc:Q17M58]	kinase brain isozyme-like isoform X1	N	protein C kinase 53E, isoform B	FBgn0003091	Pkc53E	CG6622	81.02	0
AAEL005431	-0.696733	0.925573	0.849478	CLIPB37	IMM	Clip-Domain Serine Protease family B. [Source:VB Community Annotation]	urokinase-type plasminogen activator	Y	melanization protease 1, isoform A	FBgn0027930	MP1	CG1102	38.42	4e-73
AAEL000213	-0.699774			D-amino-acid oxidase-like	DIV	d-amino acid oxidase [Source:VB Community Annotation]	D-amino-acid oxidase-like	N	uncharacterized protein CG11236, isoform A	FBgn0031860	CG11236	CG11236	48.07	8e-112
AAEL005790	-0.699876		-0.506056	malic enzyme	MET	Malic enzyme [Source:UniProtKB/TrEMBL;Acc:Q178T5]	NADP-dependent malic enzyme-like isoform X4	N	malic enzyme, isoform A	FBgn0002719	Men	CG10120	68.93	0
AAEL009192	-0.702915	0.535611		SCRASP1	IMM	Class A Scavenger Receptor (SRCR domain) with Serine Protease domain. [Source:VB Community Annotation]	trypsin-like serine protease	Y	tequila, isoform D	FBgn0023479	teq	CG4821	51.74	0
AAEL004899	-0.703486	-1.29364	-0.865867		UNK		basic tail-containing salivary secreted peptide	Y
AAEL006568	-0.704986			SPE	IMM	serine protease [Source:VB Community Annotation]	serine protease easter-like, spaetzle-processing enzyme	N	Spatzle-Processing enzyme	FBgn0039102	SPE	CG16705	41.96	2e-61
AAEL007024	-0.714806		-0.681919	CYP6AG3	RSM	cytochrome P450 [Source:VB Community Annotation]	cytochrome p450	N	Cyp28d1	FBgn0031689	Cyp28d1	CG10833	38.2	1e-123
AAEL001488	-0.716204			RpL15	RTT	60S ribosomal protein L15 [Source:VB Community Annotation]	60S ribosomal L15	N	ribosomal protein L15, isoform I	FBgn0028697	RpL15	CG17420	72.82	3e-95
AAEL003402	-0.71952			sphingomyelin phosphodiesterase-like isoform X1	MET	sphingomyelin phosphodiesterase [Source:VB Community Annotation]	sphingomyelin phosphodiesterase-like isoform X1	N	CG3376, isoform D	FBgn0034997	CG3376	CG3376	70.78	0
AAEL014526	-0.732872			sideroflexin 1,2,3	TRP	sideroflexin 1,2,3 [Source:VB Community Annotation]	sideroflexin 1,2,3	N	uncharacterized protein CG11739, isoform C		CG11739	CG11739	62.1	2e-50
AAEL010242	-0.737728	-1.48745	-1.12525		UNK		kDa secreted	Y
AAEL002639	-0.750946	-1.04862		Rpl36-2	RTT	60S ribosomal protein L36 [Source:UniProtKB/TrEMBL;Acc:Q17HK5]	60S ribosomal L36-like	N	ribosomal protein L36, isoform D	FBgn0002579	RpL36	CG7622	80.91	2e-59
AAEL004931	-0.755298	1.51406		beta-hexosaminidase b	MET	beta-hexosaminidase b [Source:VB Community Annotation]	beta-hexosaminidase b	Y	hexosaminidase 2	FBgn0041629	Hexo2	CG1787	32.21	5e-63
AAEL012255	-0.764973		-0.706195	LRIM13	IMM	leucine-rich immune protein (Short) [Source:VB Community Annotation]	leucine-rich repeat	Y	uncharacterized protein CG18480, isoform A	FBgn0028518	CG18480	CG18480	36.09	1e-10
AAEL001816	-0.765917			glucosyl transferase	MET	glucosyl/glucuronosyl transferases [Source:VB Community Annotation]	UDP-glucuronosyltransferase 1-1	Y	uncharacterized protein CG10178, isoform A	FBgn0032684	CG10178	CG10178	47.07	2e-167
AAEL008028	-0.778549		-0.68221	monocarboxylate transporter 1	TRP	monocarboxylate transporter [Source:VB Community Annotation]	monocarboxylate transporter	N	monocarboxylate transporter 1, isoform A	FBgn0023549	Mct1	CG3456	55.61	0
AAEL006207	-0.779771		-0.68385		UNK		AAEL006207-PA	N	CG6830	FBgn0037934	CG6830	CG6830	31.21	8e-153
AAEL010205	-0.781032	-1.28463		myofilin	CS		AAEL010205-PE	N	myofilin, isoform E	FBgn0038294	Mf	CG6803	56.1	2e-52
AAEL006446	-0.783938		-0.735303	Trehalose-6-phosphate synthase 1	MET	trehalose-6-phosphate synthase [Source:VB Community Annotation]	trehalose-6-phosphate synthase component tps1	N	Trehalose-6-phosphate synthase 1	FBgn0027560	Tps1	CG4104	76.74	0
AAEL006004	-0.785535		-0.826475	ankyrin 2	IMM		AAEL006004-PA	N	ankyrin 2, isoform N	FBgn0261788	Ank2	CG42734	24.85	1e-31
AAEL004022	-0.787			caborxylesterase	MET		carboxylesterase 3	Y	CG5397, isoform A	FBgn0031327	CG5397	CG5397	48.98	0
AAEL013484	-0.808473		-0.801255	conserved plasma membrane	UNK		conserved plasma membrane	N
AAEL006412	-0.809923			inebriated	TRP	sodium- and chloride-dependent neurotransmitter transporter [Source:VB Community Annotation]	sodium- and chloride-dependent neurotransmitter transporter	N	inebriated, isoform E	FBgn0011603	ine	CG15444	73.41	0
AAEL005733	-0.810019	-1.1541		myosin heavy chain	CS	myosin heavy chain, nonmuscle or smooth muscle [Source:VB Community Annotation]	myosin heavy muscle-like isoform X11	N	myosin heavy chain, isoform P	FBgn0264695	Mhc	CG17927	87.97	0
AAEL008646	-0.811141	1.12678	0.572969	fibrinoge-related	DIV/IMM	fibrinogen and fibronectin [Source:VB Community Annotation]	microfibril-associated glyco 4-like	N	uncharacterized protein CG30281	FBgn0050281	CG30281	CG30281	45.24	5e-55
AAEL001851	-0.813596			conserved secreted precursor	UNK		conserved secreted precursor	Y	CG5080, isoform A	FBgn0031313	CG5080	CG5080	31.05	6e-73
AAEL003581	-0.816888		-0.999706	phosphoribosylamidotransferase	DIV	Amidophosphoribosyltransferase [Source:UniProtKB/TrEMBL;Acc:Q17F21]	amidophosphoribosyltransferase-like	N	phosphoribosylamidotransferase, isoform A	FBgn0004901	Prat	CG2867	79.88	0
AAEL000311	-0.819155			fondue	BF		cell wall awa1	Y	fondue, isoform A	FBgn0032773	fon	CG15825	45.95	2e-13
AAEL007455	-0.821821			thrombospondin	DIV	thrombospondin [Source:VB Community Annotation]	thrombospondin	Y	thrombospondin, isoform A	FBgn0031850	Tsp	CG11326	45.66	0
AAEL014609	-0.822482	-1.11155	-2.25434	CYP9J26	RSM	cytochrome P450 [Source:VB Community Annotation]	cytochrome P450	N	Cyp9f2	FBgn0038037	Cyp9f2	CG11466	41.41	4e-142
AAEL001289	-0.826265		-0.754766	permease	TRP	permease, putative [Source:VB Community Annotation]	transporter major facilitator superfamily	N	CG1208, isoform B	FBgn0037386	CG1208	CG1208	24.37	7e-25
AAEL011981	-0.842328			glutamate decarboxylase	MET	glutamate decarboxylase [Source:VB Community Annotation]	glutamate decarboxylase	N	glutamic acid decarboxylase 1, isoform C	FBgn0004516	Gad1	CG14994	81.57	0
AAEL018102	-0.856257			Odorant-binding protein 99a	BF		salivary odorant binding 1	Y	Odorant-binding protein 99a, isoform A	FBgn0039678	Obp99a	CG18111	28.87	7e-10
AAEL000575	-0.85742			Apyrase	BF	apyrase, putative [Source:VB Community Annotation]	apyrase nucleotidase	Y	uncharacterized protein CG42249, isoform B	FBgn0259101	CG42249	CG42249	46.02	8e-169
AAEL000551	-0.858629			serine protease inhibitor i ii	UNK		serine protease inhibitor i ii	Y
AAEL014936	-0.872797			sarcosine dehydrogenase	MET	sarcosine dehydrogenase [Source:VB Community Annotation]	sarcosine mitochondrial	N	sarcosine dehydrogenase	FBgn0034276	Sardh	CG6385	59.68	0
AAEL010028	-0.877217			sarcosine dehydrogenase	MET	sarcosine dehydrogenase [Source:VB Community Annotation]	sarcosine mitochondrial	N	sarcosine dehydrogenase	FBgn0034276	Sardh	CG6385	59.8	0
AAEL000271	-0.891383		0.635343	gamma-glutamyl hydrolase	DIV	gamma-glutamyl hydrolase [Source:VB Community Annotation]	gamma-glutamyl hydrolase-like isoform X1	Y	lethal (3) 72Dp	FBgn0263607	l(3)72Dp	CG32155	50.94	4e-111
AAEL002269	-0.900729		-0.830701	Purine nucleoside phosphorylase	DIV	Purine nucleoside phosphorylase [Source:UniProtKB/TrEMBL;Acc:Q17IS2]	AGAP005945-	N	uncharacterized protein CG16758, isoform F	FBgn0035348	CG16758	CG16758	59.36	1e-127
AAEL007391	-0.901584		-1.65355	orcokinin peptides type b	DIV		orcokinin peptides type b	Y
AAEL007818	-0.903983	-1.39812	-1.23496	Trypsin 3A1 precursor	PROT	Trypsin 3A1 Precursor (EC 3.4.21.4) [Source:VB Community Annotation]	TRY3_AEDAE ame: Full=Trypsin 3A1 Flags: Precursor	Y	uncharacterized protein CG31954	FBgn0051954	CG31954	CG31954	51.3	7e-78
AAEL015515	-0.912786	1.89458		CECG	IMM	cecropin anti-microbial peptide [Source:VB Community Annotation]	CEC-G	Y	cecropin C	FBgn0000279	CecC	CG1373	40.32	4e-07
AAEL007193	-0.922821			amino acid transporter	TRP	amino acid transporter [Source:VB Community Annotation]	proton-coupled amino acid transporter CG1139	N	CG7888, isoform C	FBgn0036116	CG7888	CG7888	52.36	4e-159
AAEL001673	-0.931483	-1.45787		actin 57B	CS	actin [Source:VB Community Annotation]	muscle	N	actin 57B	FBgn0000044	Act57B	CG10067	98.94	0
AAEL013486	-0.936447		-0.705784		UNK		AAEL013486-PA	N
AAEL013021	-0.937918	-1.29179		ribosomal protein S5a	RTT		ribosomal S5	N	ribosomal protein S5a, isoform A	FBgn0002590	RpS5a	CG8922	46.43	1e-10
AAEL010529	-1.07423			CNMamide	UNK		conserved secreted precursor	Y	CNMamide, isoform D	FBgn0035282	CNMa	CG13936	25.13	2e-06
AAEL005961	-1.08625			actin 88F	CS	actin [Source:VB Community Annotation]	indirect flight muscle	N	actin 88F	FBgn0000047	Act88F	CG5178	98.14	0
AAEL004027	-1.13298	-1.35364		glucose dehydrogenase	MET	glucose dehydrogenase [Source:VB Community Annotation]	glucose dehydrogenase [ quinone]-like isoform X1	N	CG9512, isoform A	FBgn0030593	CG9512	CG9512	39.83	1e-145
AAEL004631	-1.13838	-1.51463		actin-87E	CS	actin [Source:VB Community Annotation]	actin-87E	N	actin 87E, isoform B	FBgn0000046	Act87E	CG18290	99.2	0
AAEL008701	-1.15708		-0.562259	myoinositol oxygenase	DIV	myoinositol oxygenase [Source:VB Community Annotation]	inositol oxygenase-like	N	CG6910, isoform B	FBgn0036262	CG6910	CG6910	71.63	7e-153
AAEL010712	-1.21834			low-density lipoprotein	TRP	low-density lipoprotein receptor (ldl) [Source:VB Community Annotation]	low-density lipo receptor-related 4	N	CG8909, isoform D		CG8909	CG8909	55.22	0
AAEL013535	-1.27478			arrestin a	DIV	phosrestin ii (arrestin a) (arrestin 1) [Source:VB Community Annotation]	arrestin homolog	N	arrestin 1, isoform A	FBgn0000120	Arr1	CG5711	70.87	0
AAEL003821		2.36628	1.42283		UNK			Y
AAEL001882		2.25886			UNK		uncharacterized protein LOC5572814	N
AAEL003816		2.15129			UNK		AAEL003816-PB	Y
AAEL005800		2.03471		CLIPE11	IMM	Clip-Domain Serine Protease family E. Protease homologue. [Source:VB Community Annotation]	serine protease	N	serine protease immune response integrator, isoform B	FBgn0030051	spirit	CG2056	27.27	2e-15
AAEL001098		1.98452		CLIP, putative	IMM	clip-domain serine protease, putative [Source:VB Community Annotation]	melanization protease 1-like	Y	melanization protease 1, isoform A	FBgn0027930	MP1	CG1102	29.53	2e-33
AAEL002557		1.91899	1.10443	cationic amino acid transporter	TRP	cationic amino acid transporter [Source:VB Community Annotation]	Y+L amino acid transporter 2-like isoform X1	N	CG1607, isoform B	FBgn0039844	CG1607	CG1607	81.24	0
AAEL002022		1.86987		ejaculatory bulb protein III	DIV	protein serine/threonine kinase, putative [Source:VB Community Annotation]	sensory appendage	Y	ejaculatory bulb protein III, isoform A	FBgn0011695	EbpIII	CG11390	62.9	3e-51
AAEL004809		1.85546	1.13725		UNK		kDa salivary	Y	uncharacterized protein CG15043, isoform A	FBgn0030929	CG15043	CG15043	35.54	2e-23
AAEL009745		1.82118		nitric oxide synthase	DIV	Nitric oxide synthase [Source:UniProtKB/TrEMBL;Acc:Q16UY1]	nitric oxide synthase-like	N	nitric oxide synthase, isoform A	FBgn0011676	Nos	CG6713	73.05	0
AAEL012780		1.76457		snake-like	IMM	trypsin, putative [Source:VB Community Annotation]	transmembrane protease serine 9 isoform X2	N	snake, isoform A	FBgn0003450	snk	CG7996	40.68	3e-51
AAEL008080		1.74398	1.45417	tryspin-eta	PRO	trypsin-eta, putative [Source:VB Community Annotation]	trypsin-like serine protease	Y	CG6041	FBgn0029826	CG6041	CG6041	26.17	2e-16
AAEL003841		1.73445		DEFA	IMM	defensin anti-microbial peptide [Source:VB Community Annotation]	defensin A	Y	defensin	FBgn0010385	Def	CG1385	47.37	3e-18
AAEL005330		1.72988		Guanyl cyclase	DIV	atrial natriuretic peptide receptor [Source:VB Community Annotation]	guanylate cyclase 32E isoform X1	Y	guanyl cyclase at 32E, isoform B	FBgn0010197	Gyc32E	CG33114	56.67	0
AAEL013895		1.6535			UNK		kDa salivary	Y	protein Dmel_CG15043, isoform A	FBgn0030929	CG15043	CG15043	35.71	5e-23
AAEL014078		1.64966		serpin 27A	IMM	serine protease inhibitor, serpin [Source:VB Community Annotation]	serine protease inhibitor 27A	Y	serpin 27A, isoform A	FBgn0028990	Spn27A	CG11331	39.06	1e-79
AAEL006971		1.59589	1.72347		UNK		conserved secreted precursor	Y
AAEL012785		1.57269		CLIPB23	IMM	Clip-Domain Serine Protease family B. Protease homologue. [Source:VB Community Annotation]	transmembrane protease serine 9 isoform X2	N	snake, isoform A	FBgn0003450	snk	CG7996	29.13	4e-24
AAEL002610		1.54499	0.722986	serine protease	IMM	serine protease [Source:VB Community Annotation]	serine protease 44-like	Y	CG5390, isoform A	FBgn0032213	CG5390	CG5390	50.36	3e-97
AAEL007046		1.52654		Ucp4A	DIV (met/rsm)	mitochondrial brown fat uncoupling protein [Source:VB Community Annotation]	mitochondrial uncoupling 2-like	N	Ucp4A, isoform A	FBgn0030872	Ucp4A	CG6492	33.43	1e-58
AAEL003276		1.51683		snake-like	IMM		transmembrane protease serine 9 isoform X2	N	snake, isoform A	FBgn0003450	snk	CG7996	41.37	8e-53
AAEL011610		1.51029	0.934493	CTLGA8	IMM	C-Type Lectin (CTL) - galactose binding [Source:VB Community Annotation]	coagulation factor IX-like	Y	triforce, isoform C	FBgn0035199	tfc	CG9134	28.72	1e-16
AAEL010270		1.5065		snake-like	IMM		polyserase-2	Y	snake, isoform A	FBgn0003450	snk	CG7996	39.04	3e-45
AAEL017455		1.49594	0.937044	brain acid soluble 1-like	UNK		brain acid soluble 1-like	Y
AAEL010500		1.49561		GSTX2	DIV	glutathione transferase [Source:VB Community Annotation]	glutathione S-transferase D7-like	N	glutathione S transferase D7	FBgn0010043	GstD7	CG4371	48.28	5e-63
AAEL008935		1.45383		trithorax group osa	UNK		trithorax group osa	Y	CG3588, isoform E	FBgn0025643	CG3588	CG3588	43.1	5e-11
AAEL003857		1.44632		DEFD	IMM	defensin anti-microbial peptide [Source:VB Community Annotation]	defensin A4	Y	defensin	FBgn0010385	Def	CG1385	56.14	5e-18
AAEL013245		1.43907		CLIPB28	IMM	Clip-Domain Serine Protease family B. [Source:VB Community Annotation]	serine protease 7-like isoform X2	Y	easter, isoform A	FBgn0000533	ea	CG4920	33.05	2e-47
AAEL002559		1.4336			UNK		AAEL002559-PA, partial	N	uncharacterized protein Dmel_CG31028	FBgn0051028	CG31028	CG31028	61.17	0
AAEL001964		1.43264		ejaculatory bulb protein III	DIV	protein serine/threonine kinase, putative [Source:VB Community Annotation]	ejaculatory bulb-specific 3-like	Y	ejaculatory bulb protein III, isoform A	FBgn0011695	EbpIII	CG11390	61.47	4e-49
AAEL002301		1.43194	0.494642	serine protease	IMM	serine protease [Source:VB Community Annotation]	serine protease	Y	CG5390, isoform A	FBgn0032213	CG5390	CG5390	40.4	4e-82
AAEL002590		1.42839		serine protease	IMM	serine protease, putative [Source:VB Community Annotation]	serine protease 27	Y	CG5390, isoform A	FBgn0032213	CG5390	CG5390	42.95	2e-77
AAEL001077		1.42413		CLIPB45	IMM	Clip-Domain Serine Protease family B. Protease homologue. [Source:VB Community Annotation]	serine protease easter	Y	CG7432	FBgn0038727	CG7432	CG7432	34.57	9e-34
AAEL012956		1.42087		elastase	PROT/IMM	elastase, putative [Source:VB Community Annotation]	serine protease 55 isoform X1	Y	uncharacterized protein Dmel_CG31326	FBgn0051326	CG31326	CG31326	31.58	7e-33
AAEL000038		1.42013		CLIPB6	IMM	Clip-Domain Serine Protease family B. [Source:VB Community Annotation]	serine protease easter-like	Y	melanization protease 1, isoform A	FBgn0027930	MP1	CG1102	40.05	4e-84
AAEL005807		1.38953		serine protease	IMM		serine protease	Y
AAEL003114		1.38571			UNK		AAEL003114-PA	Y
AAEL005093		1.37738		CLIPB46	IMM	Clip-Domain Serine Protease family B. [Source:VB Community Annotation]	serine protease easter-like	Y	melanization protease 1, isoform A	FBgn0027930	MP1	CG1102	37.56	2e-79
AAEL014349		1.3731		CLIPB15	IMM	Clip-Domain Serine Protease family B. [Source:VB Community Annotation]	serine protease easter	Y	easter, isoform A	FBgn0000533	ea	CG4920	38.72	9e-72
AAEL014382		1.37306		CTLMA14	IMM	C-Type Lectin (CTL) - mannose binding. [Source:VB Community Annotation]	CTLMA2	Y	triforce, isoform C	FBgn0035199	tfc	CG9134	41.6	4e-22
AAEL008473		1.37225		systeine-rich venom protein	UNK	cysteine-rich venom protein, putative [Source:VB Community Annotation]	Golgi-associated plant pathogenesis-related 1-like	N	uncharacterized protein Dmel_CG16995	FBgn0031412	CG16995	CG16995	53.54	2e-39
AAEL002593		1.36741		serine protease	IMM	serine protease [Source:VB Community Annotation]	tryptase-like isoform X2	Y	uncharacterized protein Dmel_CG40160, isoform H	FBgn0058160	CG40160	CG40160	48.99	3e-132
AAEL003568		1.36448		threonine dehydratase	DIV	threonine dehydratase/deaminase [Source:VB Community Annotation]	threonine dehydratase deaminase	N	CG8129, isoform B	FBgn0037684	CG8129	CG8129	72.92	0
AAEL009520		1.35664	0.524979	LRIM2	IMM	leucine-rich immune protein (Long) [Source:VB Community Annotation]	leucine-rich immune protein	N	scribbled, isoform T	FBgn0263289	scrib	CG43398	30.47	6e-15
AAEL004156		1.33968		fibrinogen-related	IMM	fibrinogen and fibronectin [Source:VB Community Annotation]	aslectin AL-1	Y	uncharacterized protein Dmel_CG30280, isoform B	FBgn0050280	CG30280	CG30280	40.16	2e-55
AAEL002492		1.33628		gasp	UNK		AAEL002492-PA	Y	gasp, isoform B	FBgn0026077	Gasp	CG10287	37.7	3e-06
AAEL001084		1.32899	1.07052	CLIPB21	IMM	Clip-Domain Serine Protease family B. Protease homologue. [Source:VB Community Annotation]	serine protease easter-like	Y	easter, isoform A	FBgn0000533	ea	CG4920	31.27	4e-36
AAEL005812		1.32821		protease	PROT		protease m1 zinc metalloprotease	N	CG4386	FBgn0034661	CG4386	CG4386	25.47	1e-07
AAEL013801		1.31898		sulphate transporter	TRP	sulphate transporter [Source:VB Community Annotation]	sodium-independent sulfate anion transporter isoform X1	N	CG6125, isoform B	FBgn0038337	CG6125	CG6125	49.35	2e-166
AAEL014390		1.31686		triforce	IMM	galactose-specific C-type lectin, putative [Source:VB Community Annotation]	chymotrypsinogen B	Y	triforce, isoform C	FBgn0035199	tfc	CG9134	29.78	2e-16
AAEL017144		1.31364	0.87497	glycine-rich DOT1-like	UNK		glycine-rich DOT1-like	Y
AAEL002601		1.31268		CLIPA1	IMM	Clip-Domain Serine Protease family A. Protease homologue. [Source:VB Community Annotation]	proclotting enzyme isoform X2	N	CG5390, isoform A	FBgn0032213	CG5390	CG5390	40.29	1e-65
AAEL007880		1.30623	1.17688	ornithine decarboxylase 1	MET	ornithine decarboxylase [Source:VB Community Annotation]	ornithine decarboxylase	N	ornithine decarboxylase 1	FBgn0013307	Odc1	CG8721	46.02	2e-123
AAEL002585		1.28568	0.646874	serine protease	IMM	serine protease [Source:VB Community Annotation]	serine protease 44-like	Y	CG5390, isoform A	FBgn0032213	CG5390	CG5390	44.98	9e-96
AAEL014565		1.28198			UNK		AAEL014565-PA, partial	N
AAEL008039		1.28107	1.39675		UNK		isoform A	Y	uncharacterized protein CG13704	FBgn0035583	CG13704	CG13704	41.49	1e-21
AAEL012430		1.27137		AMP-dependent ligase	DIV	AMP dependent ligase [Source:VB Community Annotation]	probable 4-coumarate-- ligase 1	N	CG4830	FBgn0037996	CG4830	CG4830	34.08	3e-100
AAEL003699		1.27075			UNK		AAEL003699-PA, partial	N
AAEL007992		1.27024		grass/ Gram-positive specific serine protease	PROT/IMM	trypsin, putative [Source:VB Community Annotation]	serine protease 7-like	N	Gram-positive specific serine protease, isoform B	FBgn0039494	grass	CG5896	30.6	1e-35
AAEL001794		1.2678		TEP20	IMM	macroglobulin/complement [Source:VB Community Annotation]	CD109 antigen	N	Thioester-containing protein 2, isoform D	FBgn0041182	Tep2	CG7052	31.81	0
AAEL008532		1.26392		alpha-esterase-7	DIV	Carboxylic ester hydrolase (Fragment) [Source:UniProtKB/TrEMBL;Acc:Q16YG4]	esterase FE4	Y	alpha-Esterase-7	FBgn0015575	alpha-Est7	CG1112	27.89	2e-52
AAEL011007		1.26261		fibrinoge-related	IMM	fibrinogen and fibronectin [Source:VB Community Annotation]	aslectin AL-1	Y	uncharacterized protein Dmel_CG30280, isoform B	FBgn0050280	CG30280	CG30280	40.16	2e-55
AAEL000037		1.24408	0.500927	CLIPB35	IMM	Clip-Domain Serine Protease family B. [Source:VB Community Annotation]	melanization protease 1-like	Y	easter, isoform A	FBgn0000533	ea	CG4920	45.1	4e-96
AAEL015458		1.23766		Tf1	IMM	transferrin [Source:VB Community Annotation]	transferrin precursor	Y	transferrin 1, isoform A	FBgn0022355	Tsf1	CG6186	45.41	0
AAEL000059		1.23534		CLIPB19	IMM	Clip-Domain Serine Protease family B. Protease homologue. [Source:VB Community Annotation]	serine protease easter-like	Y	easter, isoform A	FBgn0000533	ea	CG4920	35.26	2e-61
AAEL002595		1.23472		serine protease	IMM	serine protease [Source:VB Community Annotation]	tryptase-2	Y	CG5390, isoform A	FBgn0032213	CG5390	CG5390	57.48	8e-142
AAEL017265		1.23169		CTLGA7	IMM	C-Type Lectin (CTL) - galactose binding. [Source:VB Community Annotation]	coagulation factor IX-like	Y	triforce, isoform C	FBgn0035199	tfc	CG9134	34.07	3e-18
AAEL007371		1.2309			UNK		AAEL007371-PA	Y
AAEL009474		1.22774		PGRPS1	IMM	Peptidoglycan Recognition Protein (Short) [Source:VB Community Annotation]	peptidoglycan recognition 1 short	N	peptidoglycan recognition protein SA, isoform A	FBgn0030310	PGRP-SA	CG11709	45.26	6e-56
AAEL012577		1.21622			UNK		AAEL012577-PA	Y	uncharacterized protein Dmel_CG12811	FBgn0037779	CG12811	CG12811	31.07	2e-22
AAEL018241		1.21617	2.23007		UNK		PREDICTED: uncharacterized protein LOC109406416	N
AAEL010867		1.21615		snake-like	IMM	serine protease [Source:VB Community Annotation]	serine protease snake-like	Y	snake, isoform A	FBgn0003450	snk	CG7996	40.8	2e-68
AAEL017325		1.19716		CLIPB36	IMM	Clip-Domain Serine Protease family B. (Truncated Protease). [Source:VB Community Annotation]	serine protease easter-like	Y	easter, isoform A	FBgn0000533	ea	CG4920	36.36	1e-48
AAEL010139		1.19141	0.486691	serine protease	IMM	serine protease, putative [Source:VB Community Annotation]	serine protease	Y	lethal (2) 34Fc, isoform A	FBgn0261534	l(2)34Fc	CG7532	33.99	5e-16
AAEL000024		1.19013		yellow-f	DIV	dopachrome-conversion enzyme (DCE), putative [Source:VB Community Annotation]	dopachrome-conversion enzyme	Y	yellow-f, isoform C	FBgn0041710	yellow-f	CG18550	47.53	2e-137
AAEL002582		1.18916		coagulation factor X	DIV	coagulation factor X, putative [Source:VB Community Annotation]	serine protease 42 isoform X1	N	CG5390, isoform A	FBgn0032213	CG5390	CG5390	29.37	6e-34
AAEL014914		1.17967			UNK		AAEL014914-PA	Y	uncharacterized protein Dmel_CG12811	FBgn0037779	CG12811	CG12811	28.44	2e-22
AAEL010866		1.17786		snake-like	IMM	serine protease [Source:VB Community Annotation]	serine protease snake-like	Y	snake, isoform A	FBgn0003450	snk	CG7996	41.55	9e-67
AAEL002482		1.17254		chitinase	PROT		probable chitinase 10	N	uncharacterized protein Dmel_CG10725	FBgn0036362	CG10725	CG10725	23.53	7e-08
AAEL002261		1.17179		punch	DIV	GTP cyclohydrolase i [Source:VB Community Annotation]	GTP cyclohydrolase 1 isoform X2	N	punch, isoform A	FBgn0003162	Pu	CG9441	67.29	4e-137
AAEL001508		1.16839	0.786936	farnesoic acid 0-methyl transferase	UNK		farnesoic acid 0-methyl transferase	Y
AAEL012163		1.16613			UNK		AAEL012163-PA	N
AAEL006168		1.16493		CLIPB42	IMM	Clip-Domain Serine Protease family B. [Source:VB Community Annotation]	melanization protease 1-like	Y	melanization protease 1, isoform A	FBgn0027930	MP1	CG1102	33.42	4e-61
AAEL000074		1.16224	0.497538	CLIPB1	IMM	Clip-Domain Serine Protease family B. [Source:VB Community Annotation]	serine protease easter-like	Y	easter, isoform A	FBgn0000533	ea	CG4920	39.9	3e-86
AAEL001641		1.16047		deoxyribonuclease I	DIV	deoxyribonuclease I, putative [Source:VB Community Annotation]	deoxyribonuclease I	Y	CG6839	FBgn0036831	CG6839	CG6839	23.56	3e-10
AAEL017380		1.1599	1.59561	glycine-rich DOT1-like	UNK		glycine-rich DOT1-like	Y
AAEL014454		1.15263			UNK		uncharacterized protein LOC5564470	N
AAEL017023		1.15034	0.760031	TEP24	IMM		CD109 antigen-like	Y	Thioester-containing protein 2, isoform G	FBgn0041182	Tep2	CG7052	29.34	0
AAEL000374		1.14504		cysteine-rich venom protein	UNK	cysteine-rich venom protein, putative [Source:VB Community Annotation]	chymotrypsin inhibitor-like	Y	uncharacterized protein Dmel_CG42259, isoform B	FBgn0266569	CG42259	CG42259	29.49	1e-05
AAEL014451		1.14224	2.16356		UNK		AAEL014451-PA	N
AAEL007109		1.1416		urokinase-type plasminogen activator	BF		urokinase-type plasminogen activator	Y	uncharacterized protein Dmel_CG32260, isoform C	FBgn0052260	CG32260	CG32260	33.6	3e-27
AAEL000834		1.13914		dimethylaniline monooxygenase	DIV	dimethylaniline monooxygenase [Source:VB Community Annotation]	senecionine N-oxygenase-like	N	Flavin-containing monooxygenase 1	FBgn0034943	Fmo-1	CG3006	52.25	3e-161
AAEL001271		1.1364			UNK		uncharacterized protein LOC5569608 isoform X1	Y	uncharacterized protein Dmel_CG17032, isoform A	FBgn0036547	CG17032	CG17032	38.37	2e-06
AAEL012353		1.13407		CTL15	IMM	C-Type Lectin (CTL). [Source:VB Community Annotation]	C-type lectin 37Db-like	Y	triforce, isoform C	FBgn0035199	tfc	CG9134	36.07	1e-19
AAEL009536		1.13393	1.44054	painless	TRP		transient receptor potential cation channel painless-like	N	painless, isoform A	FBgn0060296	pain	CG15860	25.43	5e-39
AAEL013033		1.13208		serine protease	IMM	serine protease, putative [Source:VB Community Annotation]	serine protease 53-like	N	uncharacterized protein Dmel_CG30090	FBgn0050090	CG30090	CG30090	29.11	2e-09
AAEL007107		1.12999		serine protease	IMM	serine protease, putative [Source:VB Community Annotation]	urokinase-type plasminogen activator	Y	CG8870	FBgn0038144	CG8870	CG8870	30.37	4e-28
AAEL004591		1.12411			UNK		AAEL004591-PC	Y
AAEL003965		1.1198		calpain-A	PROT	calpain 4, 6, 7, invertebrate [Source:VB Community Annotation]	calpain-B isoform X4	N	Calpain-A, isoform D	FBgn0012051	CalpA	CG7563	54.9	0
AAEL002406		1.11804		cytochrome b561 domain-containing 2-like	UNK		cytochrome b561 domain-containing 2-like	N	uncharacterized protein Dmel_CG13077, isoform A	FBgn0032810	CG13077	CG13077	27.43	1e-23
AAEL001892		1.11763			UNK		uncharacterized protein LOC5572813	Y
AAEL003632		1.10863		CLIPB39	IMM	Clip-Domain Serine Protease family B. [Source:VB Community Annotation]	serine protease easter	N	CG9737	FBgn0039758	CG9737	CG9737	34.45	7e-75
AAEL002624		1.10532	0.828589	serine protease	IMM	serine protease [Source:VB Community Annotation]	serine protease 44-like	Y	CG5390, isoform A	FBgn0032213	CG5390	CG5390	45.56	3e-103
AAEL014141		1.09893		SRPN5	IMM	Serine Protease Inhibitor (serpin) likely cleavage at S/M. [Source:VB Community Annotation]	serine protease inhibitor 28Dc-like	Y	serpin 28Dc	FBgn0031973	Spn28Dc	CG7219	32.26	1e-66
AAEL017071		1.0963	1.63669	alpha-esterase-9	DIV	Carboxylic ester hydrolase (Fragment) [Source:UniProtKB/TrEMBL;Acc:J9HJ23]	esterase B1-like isoform X1	N	alpha-Esterase-9, isoform C	FBgn0015577	alpha-Est9	CG1128	41.45	3e-150
AAEL005670		1.09548		SRPN1	IMM	Serine Protease Inhibitor (serpin) likely cleavage at K/F. [Source:VB Community Annotation]	serine protease inhibitor 27A-like	Y	serpin 27A, isoform A	FBgn0028990	Spn27A	CG11331	36.36	7e-65
AAEL011777		1.09517	1.20984	SRPN8	IMM	Serine Protease Inhibitor (serpin) likely cleavage at K/A. [Source:VB Community Annotation]	serine protease inhibitor	N	serpin 77Ba, isoform B	FBgn0262057	Spn77Ba	CG6680	34.39	2e-78
AAEL007778		1.09378		leucine-rich transmenbrane	IMM	leucine-rich transmembrane protein [Source:VB Community Annotation]	leucine-rich repeat-containing G- coupled receptor 4-like	Y	CG4950, isoform B	FBgn0036587	CG4950	CG4950	30.63	1e-27
AAEL002524		1.09329		CTL24	IMM	C-Type Lectin (CTL). [Source:VB Community Annotation]	CD209 antigen 2	Y	triforce, isoform C	FBgn0035199	tfc	CG9134	36.89	1e-19
AAEL009722		1.09152		CLIP, putative	IMM	clip-domain serine protease, putative [Source:VB Community Annotation]	clip-domain serine protease	Y	CG3505	FBgn0038250	CG3505	CG3505	29.09	3e-19
AAEL002481		1.09007		chitinase	PROT		probable chitinase 3	Y	CG7252	FBgn0036226	CG7252	CG7252	22.22	6e-09
AAEL012086		1.08781		LRIM1	IMM	leucine-rich immune protein (Long) [Source:VB Community Annotation]	LRR Toll	Y	tartan, isoform A	FBgn0010452	trn	CG11280	30.56	5e-09
AAEL006434		1.08623		serine protease	IMM	serine protease, putative [Source:VB Community Annotation]	transmembrane protease serine 9-like	Y	Serine-peptidase 212	FBgn0053329	Sp212	CG33329	29.17	4e-30
AAEL000087		1.08193		TEP22	IMM	macroglobulin/complement [Source:VB Community Annotation]	CD109 antigen-like	Y	Thioester-containing protein 2, isoform F	FBgn0041182	Tep2	CG7052	27.86	6e-155
AAEL007090		1.078		4-nitrophenylphosphatase	DIV	4-nitrophenylphosphatase [Source:VB Community Annotation]	glycerol-3-phosphate phosphatase	N	uncharacterized protein Dmel_CG15739, isoform A	FBgn0030347	CG15739	CG15739	39.93	8e-87
AAEL018689		1.07585			RTT			N
AAEL013857		1.07398		spirit/ serine protease immune response integrator	IMM		serine protease Hayan-like isoform X1	Y	serine protease immune response integrator, isoform B	FBgn0030051	spirit	CG2056	26.52	3e-18
AAEL007951		1.0711		GSTE2	DIV	glutathione transferase [Source:VB Community Annotation]	glutathione S-transferase 1-like	N	glutathione S transferase E12, isoform A	FBgn0027590	GstE12	CG16936	49.78	5e-73
AAEL003686		1.07067		SRPN11	IMM	Serine Protease Inhibitor (serpin) homologue - unlikely to be inhibitory. [Source:VB Community Annotation]	leukocyte elastase inhibitor	Y	serpin 42De, isoform B	FBgn0033115	Spn42De	CG9460	27.78	2e-38
AAEL001802		1.06936		TEP21	IMM	macroglobulin/complement [Source:VB Community Annotation]	CD109 antigen	N	Thioester-containing protein 2, isoform G	FBgn0041182	Tep2	CG7052	31.5	0
AAEL008097		1.06661		trypsin-eta	PROT	trypsin-eta, putative [Source:VB Community Annotation]	trypsin alpha-3	Y	CG6048	FBgn0029827	CG6048	CG6048	41.63	3e-53
AAEL017345		1.057	0.721652		UNK			Y
AAEL009127		1.05104		CYP6M11	RSM	cytochrome P450 [Source:VB Community Annotation]	cytochrome P450 6a8	N	Cyp6a14, isoform C	FBgn0033302	Cyp6a14	CG8687	46.35	2e-169
AAEL003656		1.04987			UNK		AAEL003656-PA	Y
AAEL002726		1.04614		D7	BF	D7 protein, putative [Source:VB Community Annotation]	37 kDa salivary gland allergen Aed a 2-like	N
AAEL000627		1.04568		CECA	IMM	cecropin anti-microbial peptide [Source:VB Community Annotation]	CECA_AEDAE ame: Full=Cecropin-A Flags: Precursor	Y	cecropin C	FBgn0000279	CecC	CG1373	44	2e-08
AAEL015465		1.04369		CLIP, putative	IMM	clip-domain serine protease, putative [Source:VB Community Annotation]	serine protease easter-like	N	CG9737	FBgn0039758	CG9737	CG9737	45.37	4e-58
AAEL011460		1.04346			UNK		AAEL011460-PA	N	uncharacterized protein Dmel_CG10657	FBgn0036289	CG10657	CG10657	39.05	2e-75
AAEL005770		1.04		OPB21	BF	odorant binding protein OBP21 [Source:VB Community Annotation]	general odorant-binding 99a	Y	Odorant-binding protein 99a, isoform A	FBgn0039678	Obp99a	CG18111	26.12	8e-13
AAEL005793		1.03295	0.773705	ebony	DIV	AMP dependent ligase [Source:VB Community Annotation]	AMP dependent ligase	N	ebony	FBgn0000527	e	CG3331	57.29	0
AAEL015533		1.01792		coagulation factor XI	UNK		coagulation factor XI	Y	CG3505	FBgn0038250	CG3505	CG3505	37.02	8e-42
AAEL014980		1.01511		serpin-2	IMM	serine protease inhibitor (serpin-2), putative [Source:VB Community Annotation]	leukocyte elastase inhibitor	Y	serpin 28F	FBgn0028987	Spn28F	CG8137	31.33	5e-27
AAEL002686		1.01488		testin precursor	DIV	testisin precursor, putative [Source:VB Community Annotation]	vitamin K-dependent C-like	Y	CG9631	FBgn0027563	CG9631	CG9631	25	2e-14
AAEL012842		1.01339		tryspin	PROT	trypsin, putative [Source:VB Community Annotation]	serine ase stubble-like	N	CG5390, isoform A	FBgn0032213	CG5390	CG5390	41.32	1e-51
AAEL012953		1.01103		ovochymase-2 isoform X1	UNK		ovochymase-2 isoform X1	Y	uncharacterized protein Dmel_CG31326	FBgn0051326	CG31326	CG31326	29.82	5e-31
AAEL011453		0.998989		CTL14	IMM	C-Type Lectin (CTL14) [Source:VB Community Annotation]	C-type lectin 37Da-like	Y	triforce, isoform C	FBgn0035199	tfc	CG9134	38.52	6e-20
AAEL003345		0.996406		arginosuccinate lyase	DIV	argininosuccinate lyase [Source:VB Community Annotation]	argininosuccinate lyase	N	CG9510, isoform C	FBgn0032076	CG9510	CG9510	53.28	3e-179
AAEL000277		0.977301	1.43375	lysozyme-like isoform X1	PROT		lysozyme-like isoform X1	Y	CG6426	FBgn0034162	CG6426	CG6426	57	7e-35
AAEL015297		0.971478		mitochondrial RNA polymerase	RTT	DNA-dependent RNA polymerase, putative [Source:VB Community Annotation]	DNA-directed RNA mitochondrial	N	mitochondrial RNA polymerase, isoform A	FBgn0261938	mtRNApol	CG4644	64.49	0
AAEL014937		0.964608			UNK		AAEL014937-PA	Y
AAEL007370		0.963905		dihydrofolate reductase	DIV		dihydrofolate reductase	N	dihydrofolate reductase, isoform A	FBgn0004087	Dhfr	CG14887	56.28	2e-76
AAEL004863		0.957802		yellow-d	DIV		major royal jelly 1	Y	yellow-d	FBgn0041712	yellow-d	CG9889	41.03	5e-107
AAEL014004		0.953831		easter-like	IMM	clip-domain serine protease, putative [Source:VB Community Annotation]	serine protease easter	N	easter, isoform A	FBgn0000533	ea	CG4920	35.69	4e-47
AAEL006518		0.939751		cytidine deaminase	DIV	cytidine deaminase, putative [Source:VB Community Annotation]	cytidine deaminase	N	CG8360, isoform A	FBgn0032001	CG8360	CG8360	58.5	1e-53
AAEL011319		0.937803			UNK		uncharacterized protein LOC5574677 isoform X1	N
AAEL007201		0.937789		glutamyl aminopeptidase	DIV	glutamyl aminopeptidase [Source:VB Community Annotation]	glutamyl aminopeptidase isoform X1	N	CG8773	FBgn0038135	CG8773	CG8773	51.18	0
AAEL002580		0.935239		suppressor of tumorigenicity 14	UNK		suppressor of tumorigenicity 14	N
AAEL008259		0.9309			UNK		uncharacterized protein LOC110678888	N
AAEL013661		0.929031	1.69885	ciboulot	CS	actin binding protein, putative [Source:VB Community Annotation]	thymosin 1	N	ciboulot, isoform A	FBgn0026084	cib	CG4944	62.99	3e-47
AAEL008176		0.922436	1.16935		UNK		AAEL008176-PA	N
AAEL012253		0.921076		lipophorin receptor 1	TRP		very low-density lipo receptor isoform X1	N	lipophorin receptor 1, isoform K	FBgn0066101	LpR1	CG31094	57.02	1e-41
AAEL018671		0.915562		ND3	RSM	NADH dehydrogenase subunit 3 [Source:European Nucleotide Archive;Acc:ND3]	NADH dehydrogenase subunit 3 (mitochondrion)	Y	NADH dehydrogenase subunit 3 (mitochondrion)		ND3	CG34076	78	2e-42
AAEL012534		0.913157			UNK		AAEL012534-PA	Y
AAEL003642		0.911055		serine protease	IMM	serine protease [Source:VB Community Annotation]	transmembrane protease serine 9-like	N	serine protease 7, isoform F	FBgn0037515	Sp7	CG3066	46.74	6e-95
AAEL002194		0.908781		Uricase	DIV	Uricase [Source:UniProtKB/TrEMBL;Acc:Q17J02]	urate oxidase	N	urate oxidase	FBgn0003961	Uro	CG7171	57.89	1e-132
AAEL013498		0.90871		PPO1	IMM	prophenoloxidase [Source:VB Community Annotation]	phenoloxidase 2-like	N	prophenoloxidase 1	FBgn0283437	PPO1	CG42639	52.45	0
AAEL010634		0.906923			UNK		uncharacterized protein LOC5573649	Y
AAEL007626		0.90046	0.532138	GNBPA1	IMM	Gram-Negative Binding Protein (GNBP) or Beta-1 3-Glucan Binding Protein (BGBP). [Source:VB Community Annotation]	beta-1,3-glucan-binding -like	Y	Gram-negative bacteria binding protein 1	FBgn0040323	GNBP1	CG6895	34.5	1e-81
AAEL003299		0.900457		Gly-rich secreted peptide	UNK		Gly-rich secreted peptide	Y
AAEL002969		0.894637		chitinase	PROT	brain chitinase and chia [Source:VB Community Annotation]	brain chitinase and chia	Y	chitinase 5	FBgn0038180	Cht5	CG9307	41.44	5e-113
AAEL000200		0.893948		salivary Cys-rich secreted peptide	UNK		salivary Cys-rich secreted peptide	Y	uncharacterized protein Dmel_CG14132	FBgn0040817	CG14132	CG14132	36.84	2e-10
AAEL002549		0.892208		sosie	DIV	protein sosie [Source:VB Community Annotation]	uncharacterized protein LOC5580180	N	sosie, isoform A	FBgn0039232	sosie	CG13636	44.9	6e-42
AAEL004667		0.890561			UNK		AAEL004667-PA	Y	uncharacterized protein Dmel_CG10527	FBgn0034583	CG10527	CG10527	28.68	1e-05
AAEL015404		0.889611		LYSC7B	IMM	C-Type Lysozyme (Lys-B). [Source:VB Community Annotation]	lysozyme c-1	Y	uncharacterized protein Dmel_CG11159	FBgn0034539	CG11159	CG11159	51.64	4e-47
AAEL005769		0.888751		glucose dehydrogenase	MET	glucose dehydrogenase [Source:VB Community Annotation]	glucose dehydrogenase [ quinone]	N	glucose dehydrogenase	FBgn0001112	Gld	CG1152	71.12	0
AAEL006909		0.883403			UNK		uncharacterized protein LOC5568497	Y
AAEL006389		0.872794		cathepsin I	PROT	cathepsin l [Source:VB Community Annotation]	cathepsin L	N	26-29kD-proteinase	FBgn0250848	26-29-p	CG8947	68.23	0
AAEL000851		0.871476		G-protein coupled receptor	DIV	predicted G-protein coupled receptor (GPCR) [Source:VB Community Annotation]	AAEL000851-PA	N
AAEL015527		0.870298		urokinase-type plasminogen activator	UNK		urokinase-type plasminogen activator	Y	uncharacterized protein Dmel_CG30091	FBgn0050091	CG30091	CG30091	26.41	2e-36
AAEL014551		0.860873		triacylglycerol lipase	PROT	triacylglycerol lipase, pancreatic [Source:VB Community Annotation]	pancreatic triacylglycerol lipase	N	CG5966, isoform B	FBgn0029831	CG5966	CG5966	46.23	2e-134
AAEL002023		0.860059		imaginal disc growth factor 4	PROT	imaginal disc growth factor [Source:VB Community Annotation]	chitinase Idgf4	Y	imaginal disc growth factor 4, isoform B	FBgn0026415	Idgf4	CG1780	62.36	0
AAEL009423		0.858548		SCRBQ2	IMM	Class B Scavenger Receptor (CD36 domain). [Source:VB Community Annotation]	croquemort-like	Y	croquemort, isoform B	FBgn0015924	crq	CG4280	40.97	1e-134
AAEL003483		0.853834			UNK		AAEL003483-PA	Y	CG9917, isoform A	FBgn0030740	CG9917	CG9917	21.86	3e-09
AAEL009955		0.850543		apolipophorin	IMM		AAEL009955-PA	N	apolipophorin, isoform A	FBgn0087002	apolpp	CG11064	30.91	0
AAEL000028		0.850363		CLIPB34	IMM	Clip-Domain Serine Protease family B. [Source:VB Community Annotation]	serine protease easter	Y	melanization protease 1, isoform A	FBgn0027930	MP1	CG1102	44.2	4e-96
AAEL009927		0.849759			UNK		AAEL009927-PA	Y	CG3246	FBgn0031538	CG3246	CG3246	51.4	2e-162
AAEL018687		0.848975		ND1	RSM	NADH dehydrogenase subunit 1 [Source:European Nucleotide Archive;Acc:ND1]	NADH dehydrogenase subunit 1 (mitochondrion)	N	NADH dehydrogenase subunit 1 (mitochondrion)		ND1	CG34092	81.48	3e-171
AAEL006136		0.848873		serine protease	IMM	serine protease, putative [Source:VB Community Annotation]	serine protease gd-like	Y	uncharacterized protein Dmel_CG31326	FBgn0051326	CG31326	CG31326	26.58	3e-51
AAEL018680		0.845584		ND4	RSM	NADH dehydrogenase subunit 4 [Source:European Nucleotide Archive;Acc:ND4]	NADH dehydrogenase subunit 4 (mitochondrion)	N	NADH dehydrogenase subunit 4 (mitochondrion)		ND4	CG34085	72.04	0
AAEL006662		0.838979			UNK		AAEL006662-PA	Y
AAEL008106		0.838171	0.643354	type I cytoskeletal 9-like	UNK		type I cytoskeletal 9-like	Y
AAEL013574		0.836113	1.81749	apolipoprotein D	UNK	apolipoprotein D, putative [Source:VB Community Annotation]	apolipo d lipocalin	Y	glial lazarillo, isoform A	FBgn0033799	GLaz	CG4604	26.19	9e-15
AAEL010773		0.832536		CLIPE10	IMM	Clip-Domain Serine Protease family E. Protease homologue. [Source:VB Community Annotation]	transmembrane protease serine 9	N	uncharacterized protein Dmel_CG18636	FBgn0032551	CG18636	CG18636	29.63	2e-10
AAEL015627		0.828974		LRIM29	IMM	leucine-rich immune protein (Coil-less) [Source:VB Community Annotation]	AAEL015627-PA	Y	CG4950, isoform B	FBgn0036587	CG4950	CG4950	37.5	2e-05
AAEL012853		0.828318		serine threonine	UNK		serine threonine- phosphatase 4 regulatory subunit 2-like	N
AAEL000650		0.822089		Gp150	UNK		membrane glyco LIG-1	N	Gp150, isoform C	FBgn0013272	Gp150	CG5820	34.11	4e-09
AAEL017012		0.81475		a kinase anchor protein	DIV		fibrous sheath CABYR-binding -like isoform X1	N	A kinase anchor protein 200, isoform A	FBgn0027932	Akap200	CG13388	47.02	5e-15
AAEL004783		0.812957		Oda	DIV	Ornithine decarboxylase antizyme (ODC-Az) [Source:VB Community Annotation]	ornithine decarboxylase antizyme-like	N	ornithine decarboxylase antizyme, isoform A	FBgn0014184	Oda	CG16747	43.81	5e-51
AAEL005673		0.808785		SRPN2	IMM	Serine Protease Inhibitor (serpin) likely cleavage at K/F. [Source:VB Community Annotation]	serine protease inhibitor 27A	N	serpin 27A, isoform A	FBgn0028990	Spn27A	CG11331	39.58	1e-79
AAEL010695		0.806084		alpha/beta hydrolase 1	DIV		phospholipase ABHD3-like	N	alpha/beta hydrolase 1, isoform B	FBgn0033382	Hydr1	CG8058	65.95	0
AAEL005401		0.797351		cellular repressor of E1A-stimulated genes	UNK		CREG1-like isoform X2	N	cellular repressor of E1A-stimulated genes, isoform B	FBgn0025456	CREG	CG5413	42.48	9e-56
AAEL006576		0.793895		easter-like	IMM	clip-domain serine protease, putative [Source:VB Community Annotation]	serine protease easter	N	easter, isoform A	FBgn0000533	ea	CG4920	38.33	6e-52
AAEL001751		0.793496	0.605084	cylcin	DIV	cyclin [Source:VB Community Annotation]	cyclin-related FAM58A	N	kokopelli, isoform E	FBgn0264816	koko	CG44010	57.14	3e-108
AAEL013492		0.788714		PPO5	IMM	prophenoloxidase [Source:VB Community Annotation]	phenoloxidase 2	N	prophenoloxidase 1	FBgn0283437	PPO1	CG42639	44.67	0
AAEL008564		0.787168		cue	IMM	Protein cueball Precursor [Source:VB Community Annotation]	low-density lipo receptor	Y	cueball	FBgn0011204	cue	CG12086	29.55	3e-63
AAEL002288		0.787103		serine protease	IMM	serine protease [Source:VB Community Annotation]	cationic trypsin-like	Y	CG5390, isoform A	FBgn0032213	CG5390	CG5390	41.27	2e-77
AAEL010684		0.784132		trehalose 6-phosphate phosphatase	MET	Trehalose 6-phosphate phosphatase [Source:UniProtKB/TrEMBL;Acc:A0A1S4FR40]	trehalose-6-phosphate synthase 1	Y	CG5171, isoform D	FBgn0031907	CG5171	CG5171	44.37	3e-84
AAEL000099		0.778237		CLIPB33	IMM	Clip-Domain Serine Protease family B. [Source:VB Community Annotation]	serine protease easter-like	Y	easter, isoform A	FBgn0000533	ea	CG4920	42.42	8e-91
AAEL001959		0.778034			UNK		uncharacterized protein LOC5573190	N		FBgn0263773	fok	CG43690	44.23	7e-15
AAEL005929		0.776242		ATP-binding cassette transporter	TRP	ATP-binding cassette transporter [Source:VB Community Annotation]	probable multidrug resistance-associated lethal(2)03659	N	CG5789, isoform A	FBgn0039207	CG5789	CG5789	60.49	0
AAEL012764		0.771222		glycine N-methyltransferase	DIV		glycine N-methyltransferase	N	glycine N-methyltransferase	FBgn0038074	Gnmt	CG6188	75.27	4e-164
AAEL011408		0.770011		CTL21	IMM	C-Type Lectin (CTL21) [Source:VB Community Annotation]	C-type lectin 37Db-like	Y	triforce, isoform C	FBgn0035199	tfc	CG9134	35.94	1e-18
AAEL012341		0.766027	0.519907	lipase 4	PROT	lysosomal acid lipase, putative [Source:VB Community Annotation]	lipase 3	Y	lipase 4, isoform A	FBgn0032264	Lip4	CG6113	43.12	7e-111
AAEL007555		0.763021		acyl-coa dehydrgenase	MET	acyl-coa dehydrogenase [Source:VB Community Annotation]	short branched chain specific acyl- mitochondrial	N	CG3902	FBgn0036824	CG3902	CG3902	73.57	0
AAEL000294		0.762921		enolase binding	UNK		enolase binding	Y
AAEL012767		0.759		LRIM5	IMM	leucine-rich immune protein (Short) [Source:VB Community Annotation]	leucine-rich repeats and immunoglobulin-like domains sma-10 isoform X2	Y	larval translucida, isoform A	FBgn0268063	ltl	CG32372	29.85	9e-08
AAEL017083		0.758552			UNK		AAEL017083-PA	N
AAEL003482		0.758358			UNK		27 kDa glyco -like	Y
AAEL002276		0.743965		serine protease	IMM	serine protease, putative [Source:VB Community Annotation]	serine protease 27	Y	uncharacterized protein Dmel_CG18735	FBgn0042098	CG18735	CG18735	29.97	3e-29
AAEL006674		0.743864		CLIPB29	IMM	Clip-Domain Serine Protease family B. [Source:VB Community Annotation]	melanization protease 1-like	Y	melanization protease 1, isoform A	FBgn0027930	MP1	CG1102	35.22	1e-71
AAEL006028		0.741304		crossveinless	DIV		vitellogenin-3-like isoform X1	Y	crossveinless d	FBgn0265048	cv-d	CG31150	38.36	0
AAEL007103		0.738785		LRIM15	IMM	leucine-rich immune protein (TM) [Source:VB Community Annotation]	carboxypeptidase N subunit 2	Y	CG4950, isoform B	FBgn0036587	CG4950	CG4950	33.01	2e-48
AAEL012036		0.731893		sulphate transporter	TRP	sulphate transporter [Source:VB Community Annotation]	sodium-independent sulfate anion transporter-like	N	CG5002	FBgn0034275	CG5002	CG5002	48.28	5e-176
AAEL011863		0.728487		ATP-binding cassette transporter	TRP	ABC transporter [Source:VB Community Annotation]	abc transporter	N	uncharacterized protein Dmel_CG32091	FBgn0052091	CG32091	CG32091	51.67	0
AAEL018662		0.720183		COX1	RSM	cytochrome c oxidase subunit I [Source:European Nucleotide Archive;Acc:COX1]	cytochrome c oxidase subunit (mitochondrion)	N	cytochrome c oxidase subunit I, partial (mitochondrion)		COX1	CG34067	87.67	0
AAEL001420		0.718742		LRIM8	IMM	leucine-rich immune protein (Short) [Source:VB Community Annotation]	membrane glyco LIG-1	Y	CG6749	FBgn0036040	CG6749	CG6749	35.56	8e-10
AAEL006968		0.716333			UNK		uncharacterized protein LOC5568622	Y
AAEL018664		0.712426		COX2	RSM	cytochrome c oxidase subunit II [Source:European Nucleotide Archive;Acc:COX2]	cytochrome c oxidase subunit II (mitochondrion)	N	cytochrome c oxidase subunit II (mitochondrion)		COX2	CG34069	80.44	7e-132
AAEL012251		0.708203		lipophorin receptor 1	TRP	low-density lipoprotein receptor (ldl) [Source:VB Community Annotation]	very low-density lipo receptor isoform X10	N	lipophorin receptor 1, isoform J	FBgn0066101	LpR1	CG31094	61.59	0
AAEL003243		0.70548	0.635296	CLIPB13A	IMM	Clip-Domain Serine Protease family B. [Source:VB Community Annotation]	serine protease easter-like	Y	Gram-positive specific serine protease, isoform B	FBgn0039494	grass	CG5896	38.19	5e-71
AAEL001261		0.704418			UNK		uncharacterized protein LOC5569606	Y
AAEL001402		0.699016		LRIM10B	IMM	leucine-rich immune protein (Short) [Source:VB Community Annotation]	leucine-rich repeat receptor-like serine threonine- kinase BAM2 isoform X2	Y	uncharacterized protein Dmel_CG16974, isoform A	FBgn0032479	CG16974	CG16974	30.81	3e-09
AAEL004547		0.696786			DIV		bombyxin B-1 homolog	Y
AAEL005064		0.694469		CLIPB5	IMM	Clip-Domain Serine Protease family B. [Source:VB Community Annotation]	serine protease easter	Y	easter, isoform A	FBgn0000533	ea	CG4920	50.42	5e-121
AAEL014755		0.692366	1.00039	TEP15	IMM	tep2 [Source:VB Community Annotation]	CD109 antigen-like isoform X4	N	Thioester-containing protein 3	FBgn0041181	Tep3	CG7068	45.83	0
AAEL004317		0.685336	0.773389	tailor	IMM		terminal uridylyltransferase Tailor-like	N	tailor, isoform A	FBgn0037470	Tailor	CG1091	23.89	7e-11
AAEL008635		0.683997		ATP-binding cassette transporter	TRP	ABC transporter [Source:VB Community Annotation]	ATP-binding cassette sub-family G member 4	N	CG5853, isoform A	FBgn0032167	CG5853	CG5853	66.67	0
AAEL018669		0.683973		COX3	RSM	cytochrome c oxidase subunit III [Source:European Nucleotide Archive;Acc:COX3]	cytochrome c oxidase subunit III (mitochondrion)	N	cytochrome c oxidase subunit III (mitochondrion)		COX3	CG34074	84.73	1e-157
AAEL018301		0.683965	1.3944	spartin	DIV		PREDICTED: protein spartin-like	N	spartin, isoform A	FBgn0037265	spartin	CG12001	34.61	2e-99
AAEL014846		0.679556		inx1	CS	Innexin [Source:UniProtKB/TrEMBL;Acc:Q16FA3]	innexin inx1	N	optic ganglion reduced, isoform B	FBgn0004646	ogre	CG3039	72.38	0
AAEL000064		0.672237		yellow-f2	DIV	dopachrome-conversion enzyme (DCE) isoenzyme, putative [Source:VB Community Annotation]	dopachrome conversion enzyme	Y	yellow-f2	FBgn0038105	yellow-f2	CG8063	47.11	8e-121
AAEL005665		0.664546		SRPN3	IMM	Serine Protease Inhibitor (serpin) likely cleavage at T/I. [Source:VB Community Annotation]	serine protease inhibitor 27A-like	Y	serpin 27A, isoform A	FBgn0028990	Spn27A	CG11331	37.33	1e-60
AAEL007967		0.660229		eater-like	IMM		cell death abnormality 1 isoform X2	Y	eater	FBgn0243514	eater	CG6124	36.62	5e-126
AAEL012357		0.659654			UNK		transmembrane 19 isoform X1	Y	CG9917, isoform A	FBgn0030740	CG9917	CG9917	24.03	1e-08
AAEL001561		0.656972	0.805364	enhancer of mRNA decapping	UNK		enhancer of mRNA-decapping 1	N	uncharacterized protein CG17574, isoform A	FBgn0033777	CG17574	CG17574	33.33	1e-14
AAEL000227		0.655303		SCRB8	IMM	Class B Scavenger Receptor (CD36 domain). [Source:VB Community Annotation]	lysosome membrane 2-like	N	CG3829, isoform A	FBgn0035091	CG3829	CG3829	43.91	8e-150
AAEL017132		0.653865		LYSC4	IMM	C-Type Lysozyme (Lys-C). [Source:VB Community Annotation]	lysozyme c-1-like	Y	uncharacterized protein Dmel_CG11159	FBgn0034539	CG11159	CG11159	53.72	2e-45
AAEL008607		0.647944		TEP2	IMM	tep3 [Source:VB Community Annotation]	CD109 antigen isoform X4	Y	Thioester-containing protein 3	FBgn0041181	Tep3	CG7068	40.24	0
AAEL004501		0.637087		S-adenosylmethionine synthetase	DIV	s-adenosylmethionine synthetase [Source:VB Community Annotation]	S-adenosylmethionine synthase isoform X1	N	S-adenosylmethionine synthetase, isoform E	FBgn0005278	Sam-S	CG2674	82.89	0
AAEL017212		0.636984			IMM		acidic leucine-rich nuclear phospho 32 family member B	N
AAEL001401		0.619009		LRIM10A	IMM	leucine-rich immune protein (Short) [Source:VB Community Annotation]	leucine-rich repeat receptor-like serine threonine- kinase BAM2 isoform X2	Y	CG7896	FBgn0039728	CG7896	CG7896	31.72	1e-10
AAEL002600		0.617009		serine protease	IMM	serine protease [Source:VB Community Annotation]	serine protease 42 isoform X1	N	CG5390, isoform A	FBgn0032213	CG5390	CG5390	59.43	1e-113
AAEL004694		0.616698		staccato	DIV	munc13-4 [Source:VB Community Annotation]	unc-13 homolog 4B isoform X3	N	staccato, isoform D	FBgn0266719	stac	CG34349	52.71	0
AAEL018691		0.611449	-0.673344	ssu rRNA	RTT		rRNA	N	rRNA
AAEL017395		0.610915		mitochondrial 2-oxoglutarate malate carrier	RSM		mitochondrial 2-oxoglutarate malate carrier	N	CG1907	FBgn0039674	CG1907	CG1907	63.64	1e-137
AAEL004278		0.586453		cytochrome b5-related	RSM		cytochrome b5-related	N	cytochrome b5-related, isoform A	FBgn0000406	Cyt-b5-r	CG13279	50.23	3e-158
AAEL013936		0.582354		SRPN4	IMM	Serine Protease Inhibitor (serpin) likely cleavage at I/S. Transcript A. [Source:VB Community Annotation]	serine protease inhibitor 28Dc isoform X5	Y	serpin 28Dc	FBgn0031973	Spn28Dc	CG7219	32.94	4e-48
AAEL005391		0.57515	0.734985	syntenin	DIV	syntenin [Source:VB Community Annotation]	syntenin-1-like isoform X2	N	X11Lbeta, isoform D	FBgn0052677	X11Lbeta	CG32677	23.87	7e-09
AAEL005861		0.56181		megalin	DIV	vacuolar sorting protein (vps) [Source:VB Community Annotation]	sortilin-related receptor-like	N	megalin, isoform E	FBgn0261260	mgl	CG42611	35.07	6e-101
AAEL002833		0.554073		cathepsin I	PROT	cathepsin l [Source:VB Community Annotation]	cathepsin L	Y	cysteine proteinase-1, isoform A	FBgn0013770	Cp1	CG6692	72.67	0
AAEL004498		0.542754			UNK		AAEL004498-PA	N
AAEL011658		0.540274		plasma glutamate carboxypeptidase	PROT	plasma glutamate carboxypeptidase [Source:VB Community Annotation]	plasma glutamate carboxypeptidase	N
AAEL007542		0.539661	-0.535099	black	DIV	glutamate decarboxylase [Source:VB Community Annotation]	cysteine sulfinic acid decarboxylase-like	N	black, isoform C	FBgn0000153	b	CG7811	65.44	0
AAEL014762		0.525204		Zinc transporter	TRP	zinc transporter [Source:VB Community Annotation]	zinc transporter ZIP13 homolog	N	Zinc/iron regulated transporter-related protein 99C, isoform G	FBgn0039714	Zip99C	CG7816	72.98	0
AAEL006169		0.52452		lysosomal aspartic protease precursor	PROT	Lysosomal aspartic protease Precursor (EC 3.4.23.-) [Source:VB Community Annotation]	lysosomal aspartic protease	Y	cathD, isoform A	FBgn0029093	cathD	CG1548	74.39	0
AAEL003413		0.514946		F-spondin	DIV	F-spondin [Source:VB Community Annotation]	AAEL003413-PA	Y	fat-spondin	FBgn0026721	fat-spondin	CG6953	62.07	0
AAEL018543		0.485097	-1.3223	LSU_rRNA	RTT		rRNA	N	rRNA
AAEL000541		-0.495167		fasciclin	DIV	fasciclin, putative [Source:VB Community Annotation]	fasciclin-3 isoform X1	N	fasciclin 3, isoform B	FBgn0000636	Fas3	CG5803	28.05	4e-32
AAEL015058		-0.495772	-0.532404	jitterbug	CS		filamin-B-like isoform X1	N	jitterbug, isoform C	FBgn0028371	jbug	CG30092	85.37	0
AAEL001005		-0.506264		calrectulin	DIV	calreticulin [Source:VB Community Annotation]	calreticulin	Y	calreticulin, isoform A	FBgn0005585	Calr	CG9429	76.42	0
AAEL018355		-0.512858	-0.603206	trichohyalin-plectin-similarity domain	UNK		trichohyalin-plectin-similarity domain	N
AAEL006417		-0.514573	-0.785703	D7	BF	D7 protein, putative [Source:VB Community Annotation]	37 kDa salivary gland allergen Aed a 2-like	Y
AAEL002834		-0.524925	-0.823144	inos	MET	myo-inositol-1 phosphate synthase [Source:VB Community Annotation]	myo-inositol-1 phosphate synthase	N	inos	FBgn0025885	Inos	CG11143	73.45	0
AAEL008705		-0.529772	-0.667613		UNK		AAEL008705-PA	N	CG2841, isoform C	FBgn0003159	CG2841	CG2841	39.33	4e-42
AAEL009314		-0.531878	-0.49836	adenylate cylcase	DIV	adenylate cyclase [Source:VB Community Annotation]	solute carrier family 46 member 3-like	N	uncharacterized protein CG15890, isoform A	FBgn0030576	CG15890	CG15890	70.45	0
AAEL015057		-0.532148	-0.611073	jitterbug	UNK		filamin-B-like isoform X1	N	jitterbug, isoform F	FBgn0028371	jbug	CG30092	72.62	0
AAEL001626		-0.544687		Zinc/iron transporter	TRP	zinc/iron transporter [Source:VB Community Annotation]	zinc transporter ZIP1	N	Zinc/iron regulated transporter-related protein 89B	FBgn0038412	Zip89B	CG6898	44.89	4e-109
AAEL004509		-0.555068	-0.824238	Kynurenine formamidase	DIV	Kynurenine formamidase [Source:UniProtKB/TrEMBL;Acc:Q0IFP1]	kynurenine formamidase	N	kynurenine formamidase, isoform A	FBgn0031821	KFase	CG9542	35.02	2e-46
AAEL000748		-0.559788	-0.616556		UNK		AF466597_1 secreted	Y
AAEL009869		-0.560403	-0.496841	megalin	IMM	low-density lipoprotein receptor (ldl) [Source:VB Community Annotation]	low-density lipo receptor-related 2	N	megalin, isoform E	FBgn0261260	mgl	CG42611	78.73	0
AAEL005849		-0.562148		synthetic vesicle protein	TRP	synaptic vesicle protein [Source:VB Community Annotation]	synaptic vesicle glyco 2C	N	CG3168, isoform C	FBgn0029896	CG3168	CG3168	74.75	0
AAEL014318		-0.562687	-0.612479	Msr-110	UNK		bromodomain-containing 4-like	N	Msr-110, isoform D	FBgn0015766	Msr-110	CG10596	31.38	2e-13
AAEL000019		-0.579323			UNK			Y
AAEL004964		-0.582227	-0.523582	arc	APO		regulating synaptic membrane exocytosis 1-like isoform X4	N	arc, isoform A	FBgn0000008	a	CG6741	48.39	5e-29
AAEL009988		-0.585679	-0.745305	big bang	UNK		pdz domain-containing	N	big bang, isoform H	FBgn0087007	Bbg	CG42230	56.94	2e-106
AAEL003182		-0.587407	-0.608693	SRPN26	IMM	Serine Protease Inhibitor (serpin) homologue - unlikely to be inhibitory. [Source:VB Community Annotation]	AF466599_1 serpin	Y	serpin 42Dc, isoform A	FBgn0033113	Spn42Dc	CG9455	24.24	1e-05
AAEL014644		-0.590468	-0.822022	fringe connection	TRP	UDP-sugar transporter UST74c (fringe connection protein), putative [Source:VB Community Annotation]	UDP-sugar transporter UST74c	N	fringe connection, isoform A	FBgn0042641	frc	CG3874	68.75	3e-168
AAEL000392		-0.591253	-1.28424	Mall	DIG	maltase [Source:VB Community Annotation]	probable maltase	Y	maltase A1	FBgn0002570	Mal-A1	CG8696	50.31	1e-176
AAEL005476		-0.595643	-0.855257	nostrin	UNK		AAEL005476-PA	N	nostrin, isoform G	FBgn0259734	Nost	CG42388	59.8	0
AAEL005424		-0.600841		Keap1	CS	actin binding protein, putative [Source:VB Community Annotation]	kelch-like ECH-associated 1	N	Keap1, isoform C	FBgn0038475	Keap1	CG3962	75.84	0
AAEL000068		-0.606109		RpS25	RTT	40S ribosomal protein S25 [Source:UniProtKB/TrEMBL;Acc:Q1HRL9]	ribosomal S25	N	ribosomal protein S25, isoform B	FBgn0086472	RpS25	CG6684	88.79	1e-46
AAEL006406		-0.625555	-1.00162		UNK		AF466612_1 kDa secreted	Y
AAEL008305		-0.627536	-0.670408		UNK		AF466588_1 kDa secreted	Y
AAEL007374		-0.633758		yellow-c	DIV	yellow protein precursor, putative [Source:VB Community Annotation]	yellow	Y	yellow-c, isoform A	FBgn0041713	yellow-c	CG4182	57.21	0
AAEL011510		-0.647674		inositol polyphosphate phosphatase	MET	multiple inositol polyphosphate phosphatase [Source:VB Community Annotation]	multiple inositol polyphosphate phosphatase 1	N	multiple inositol polyphosphate phosphatase 1, isoform B	FBgn0026061	Mipp1	CG4123	40.89	1e-113
AAEL001100		-0.663947		astray	DIV	phosphoserine phosphatase [Source:VB Community Annotation]	phosphoserine phosphatase isoform X2	N	astray	FBgn0023129	aay	CG3705	53.21	4e-84
AAEL015049		-0.678059		RpL35	RTT	60S ribosomal protein L35 [Source:VB Community Annotation]	dolichyl-diphosphooligosaccharide-- glycosyltransferase subunit STT3B	N	oligosaccharyl transferase 3		OstStt3	CG7748	82.95	0
AAEL010215		-0.701575		filamin	CS	filamin, putative [Source:VB Community Annotation]	filamin-B isoform X1	N	jitterbug, isoform N	FBgn0028371	jbug	CG30092	74.82	0
AAEL000732		-0.706105	-0.551726		UNK		AF466598_1 secreted	Y
AAEL008318		-0.706578		cadherin	CS	cadherin, putative [Source:VB Community Annotation]	cadherin-86C isoform X1	N	cadherin 86C, isoform F	FBgn0261053	Cad86C	CG42601	48.12	0
AAEL006333		-0.706589		salivary apyrase	BF	salivary apyrase, putative [Source:VB Community Annotation]	salivary apyrase 5 nucleotidase	N	uncharacterized protein Dmel_CG42249, isoform B	FBgn0259101	CG42249	CG42249	36.36	4e-100
AAEL015294		-0.710116	-0.965924	serine-type endopeptidase	PROT	serine-type enodpeptidase, [Source:VB Community Annotation]	salivary chymotrypsin-like enzyme	Y	CG5255	FBgn0038485	CG5255	CG5255	35.6	1e-40
AAEL008619		-0.71126	-0.62319	trypsin-like salivary secreted	PROT		trypsin-like salivary secreted	Y	uncharacterized protein CG15873	FBgn0035003	CG15873	CG15873	27.07	2e-11
AAEL001061		-0.712014		GSTD1	MET	glutathione S-transferase (GSTD1) [Source:VB Community Annotation]	glutathione S-transferase 1 isoform X1	N	glutathione S transferase D1, isoform A	FBgn0001149	GstD1	CG10045	60.78	9e-86
AAEL012743		-0.71765		glycerol-3-phosphate acytransferase	MET	glycerol-3-phosphate acyltransferase [Source:VB Community Annotation]	glycerol-3-phosphate acyltransferase	N	dihydroxyacetone phosphate acyltransferase, isoform A	FBgn0040212	Dhap-at	CG4625	41.56	0
AAEL002457		-0.730515		tan	DIV		AAEL002457-PA	N	tan, isoform A	FBgn0086367	t	CG12120	60.36	1e-166
AAEL006866		-0.747968		muscle lim protein	CS	muscle lim protein [Source:VB Community Annotation]	muscle LIM Mlp84B isoform X1	N	muscle LIM protein at 84B, isoform B	FBgn0014863	Mlp84B	CG1019	69.62	0
AAEL009670		-0.749326	-0.590365	LYSC9	IMM	C-Type Lysozyme (Lys-D). [Source:VB Community Annotation]	salivary lysozyme	Y	uncharacterized protein CG11159	FBgn0034539	CG11159	CG11159	41.13	9e-29
AAEL007064		-0.750868	-1.05825	GNBPB6	IMM	Gram-Negative Binding Protein (GNBP) or Beta-1 3-Glucan Binding Protein (BGBP). [Source:VB Community Annotation]	beta-1,3-glucan-binding -like	Y	Gram-negative bacteria binding protein 1	FBgn0040323	GNBP1	CG6895	31.4	6e-37
AAEL006719		-0.762125	-1.08116	AMY1	DIG	Alpha-amylase I Precursor (EC 3.2.1.1)(1,4-alpha-D-glucan glucanohydrolase) [Source:VB Community Annotation]	alpha-amylase I	Y	amylase distal	FBgn0000078	Amy-d	CG17876	52.5	4e-173
AAEL003053		-0.765022	-0.963965	allergen	UNK	allergen, putative [Source:VB Community Annotation]	salivary secreted antigen-5 precursor AG5-3	N	antigen 5-related 2	FBgn0020508	Ag5r2	CG9540	37.9	4e-18
AAEL010235		-0.765448	-0.893941	allergen	UNK	30 kDa salivary gland allergen Aed a 3 Precursor (Allergen Aed a 3) [Source:VB Community Annotation]	30 kDa salivary gland allergen Aed a 3-like	Y
AAEL017851		-0.797183		U3	RTT	Small nucleolar RNA U3 [Source:RFAM;Acc:RF00012]		N
AAEL015379		-0.815062	0.845969		UNK		coiled-coil-helix-coiled-coil-helix domain-containing mitochondrial-like	N	CG5010, isoform B		CG5010	CG5010	59.02	1e-37
AAEL007986		-0.822045	-1.48115		UNK		AF466604_1 kDa secreted	Y
AAEL008450		-0.842573	-0.804385		UNK		PREDICTED: uncharacterized protein LOC109397269	N	uncharacterized protein CG34375, isoform C	FBgn0085404	CG34375	CG34375	51.05	4e-55
AAEL009888		-0.845388	-0.741479	CCC2	TRP	sodium-coupled cation-chloride cotransporter [Source:VB Community Annotation]	bumetanide-sensitive Na-K-Cl cotransport	N	uncharacterized protein CG31547, isoform B		CG31547	CG31547	55.32	0
AAEL009992		-0.847815	-0.786914		UNK		AAEL009992-PA	N
AAEL007872		-0.852199			UNK		AF466595_1 34 kDa secreted	Y
AAEL004090		-0.856175	1.50352		UNK		SERAC1-like isoform X1	N	uncharacterized protein CG10383, isoform A	FBgn0032699	CG10383	CG10383	40.2	0
AAEL006423		-0.856232	-0.877355	D7, putative	UNK		short form D7cclu23-like salivary	Y
AAEL003584		-0.865877	-0.719136		UNK		probable truncated 34 kDa family member	N
AAEL010228		-0.867648	-1.15282	SAAG-4	UNK		30 kDa salivary gland allergen Aed a 3-like	Y
AAEL006424		-0.871948	-0.889532	D7	UNK	37 kDa salivary gland allergen Aed a 2 Precursor (Protein D7)(Allergen Aed a 2) [Source:VB Community Annotation]	37 kDa salivary gland allergen Aed a 2-like	Y
AAEL003718		-0.876734		glucose transporter	TRP	glucose transporter [Source:VB Community Annotation]	glucose transporter type 1 isoform X13	N	glucose transporter 1, isoform W	FBgn0264574	Glut1	CG43946	93.14	0
AAEL006485		-0.878089	-1.05171	inosine-uridine preferring nucleoside hydrolase	DIV	inosine-uridine preferring nucleoside hydrolase [Source:VB Community Annotation]	salivary purine nucleosidase	Y	uncharacterized protein CG12177, isoform A	FBgn0030510	CG12177	CG12177	37.32	2e-53
AAEL000298		-0.910084	-0.811658	sodium/chloride dependent amino acid transporter	TRP	sodium/chloride dependent amino acid transporter [Source:VB Community Annotation]	sodium Chloride dependent amino acid transporter	N	CG5549		CG5549	CG5549	66.04	0
AAEL006007		-0.948172	-0.761944	Kazal	UNK		Kazal domain-containing peptide	Y	uncharacterized protein CG45011, isoform B	FBgn0266363	CG45011	CG45011	46.15	5e-10
AAEL017302		-0.951747	0.942103	SDR-1	MET	Farnesol dehydrogenase [Source:UniProtKB/Swiss-Prot;Acc:D2WKD9]	farnesol dehydrogenase-like	N	antdh	FBgn0026268	antdh	CG1386	54.22	1e-89
AAEL010171		-0.96556	-0.770436	PGRPLB	IMM	peptidoglycan recognition protein (Long) [Source:VB Community Annotation]	peptidoglycan-recognition LB-like isoform X1	Y	peptidoglycan recognition protein LB, isoform C	FBgn0037906	PGRP-LB	CG14704	53.09	2e-75
AAEL005319		-0.976666		myosin	CS	myosin light chain kinase [Source:VB Community Annotation]		N	sallimus, isoform X	FBgn0086906	sls	CG1915	55.83	0
AAEL004382		-1.02125	-1.03186		UNK		41 kDa salivary secreted	Y
AAEL006408		-1.02572			UNK		kDa secreted	Y
AAEL000886		-1.04964	-0.851451		UNK		secreted precursor	Y
AAEL002228		-1.05742		FASN	MET	fatty acid synthase [Source:VB Community Annotation]	fatty acid synthase-like	N	fatty acid synthase 3	FBgn0040001	FASN3	CG17374	43.55	0
AAEL006797		-1.06947		leucin-rich repeat protein	IMM	F-box/leucine rich repeat protein [Source:VB Community Annotation]	F-box LRR-repeat 7	N	F-box and leucine-rich repeat protein 7	FBgn0038385	Fbxl7	CG4221	61.24	0
AAEL007780		-1.07439		no	UNK			Y
AAEL000733		-1.08458	-0.513457	hydroxysteroid dehydrogenase	MET	hydroxysteroid dehydrogenase [Source:VB Community Annotation]	3 beta-hydroxysteroid dehydrogenase Delta 5--	N	CG7724	FBgn0036698	CG7724	CG7724	46.31	2e-112
AAEL009993		-1.09454	-0.556314		UNK		AAEL009993-PA	N
AAEL010975		-1.10642		paramyosin	CS	paramyosin, long form [Source:VB Community Annotation]	long form	N	paramyosin, isoform B	FBgn0003149	Prm	CG5939	71.33	0
AAEL005596		-1.12093	-0.791338	trypsin-epsilon	PROT	trypsin-epsilon, putative [Source:VB Community Annotation]	trypsin beta-like	Y	uncharacterized protein CG10405	FBgn0038431	CG10405	CG10405	36.21	2e-38
AAEL002693		-1.17662	-0.986195	venome allergen	UNK	venom allergen [Source:VB Community Annotation]	AF466601_1 secreted	Y	antigen 5-related 2	FBgn0020508	Ag5r2	CG9540	36.76	2e-51
AAEL007776		-1.1921			UNK		AF466607_1 kDa secreted	Y
AAEL015447		-1.19741			UNK		proline-rich subfamily 1-like	N
AAEL008289		-1.22064		pupal cuticule protein 78E	DIV	pupal cuticle protein 78E, putative [Source:VB Community Annotation]	pupal cuticle Edg-78E-like	N	cuticular protein 67Fb	FBgn0036110	Cpr67Fb	CG18348	48.62	7e-30
AAEL001577		-1.22938			UNK		neurogenic locus notch homolog 1	Y	uncharacterized protein Dmel_CG13492	FBgn0034662	CG13492	CG13492	27.41	2e-42
AAEL003860		-1.23628		sodium- and chloridedependent neurotransmitter	TRP	sodium- and chloride-dependent neurotransmitter transporter [Source:VB Community Annotation]	sodium-dependent neutral amino acid transporter B(0)AT3-like isoform X1	N	uncharacterized protein Dmel_CG43066, isoform A	FBgn0262476	CG43066	CG43066	80.74	0
AAEL005043		-1.26402		ATP-dependent bile acid permease	TRP	ATP-dependent bile acid permease [Source:VB Community Annotation]	multidrug resistance-associated 1	N	Multidrug-Resistance like protein 1, isoform N	FBgn0032456	MRP	CG6214	52.49	0
AAEL007394		-1.27824	-1.15944	short salivary D7	BF		short salivary D7	Y
AAEL000498		-1.31295		defective proboscis extension	BF	defective proboscis extension response, putative [Source:VB Community Annotation]	isoform B	N	Dpr-interacting protein gamma	FBgn0039617	DIP-gamma	CG14521	73.56	0
AAEL014607		-1.32046		CYP9J27	RSM	cytochrome P450 [Source:VB Community Annotation]	cytochrome P450	N	Cyp9f2	FBgn0038037	Cyp9f2	CG11466	40.85	6e-140
AAEL009219		-1.32206		mucin	DIV		flocculation FLO11-like	N	mucin 68E	FBgn0053265	Muc68E	CG33265	35.71	2e-19
AAEL004369		-1.41971		target of brain insulin	DIV	alpha-glucosidase [Source:VB Community Annotation]	uncharacterized family 31 glucosidase KIAA1161-like	Y	target of brain insulin	FBgn0261575	tobi	CG11909	50.62	0
AAEL014234		-1.48862			UNK		AAEL014234-PA	Y
AAEL004585		-1.49706	-1.19822		UNK		secreted precursor	Y
AAEL011587		-1.50878		RpL27	RTT	60S ribosomal protein L27, putative [Source:VB Community Annotation]	60S ribosomal L27	N	ribosomal protein L27, isoform A	FBgn0039359	RpL27	CG4759	72.79	7e-59
AAEL000667		-1.5258		maltase	DIG	alpha-amylase [Source:VB Community Annotation]	probable maltase	Y	maltase A1	FBgn0002570	Mal-A1	CG8696	52.03	0
AAEL012423		-1.54734	-1.35157	salivary mucin 6	BF		salivary mucin 6	Y
AAEL005295		-1.63606			UNK		AAEL005295-PA	N
AAEL004223		-1.70098		CECB	IMM	cecropin anti-microbial peptide [Source:VB Community Annotation]	CEC-A	Y	cecropin C	FBgn0000279	CecC	CG1373	50.98	3e-10
AAEL003596		-1.85347			UNK		proline-rich subfamily 1-like	Y
AAEL015079		-1.85461	-0.805301	ionotropic receptor	TRP		AAEL015079-PA	Y	ionotropic receptor 100a	FBgn0039879	Ir100a	CG11575	32.22	4e-80
AAEL000647		-1.94744		maltase	DIG		maltase A1	Y	maltase A8	FBgn0033297	Mal-A8	CG8690	52.6	0
AAEL015647		-2.7172	-1.09061	iontropic receptor	TRP		AAEL015647-PA	Y	ionotropic receptor 100a	FBgn0039879	Ir100a	CG11575	32.28	5e-83
AAEL008355			5.8114	insulin production suppressor	DIV		AAEL008355-PA	N	limostatin, insulin production suppressor	FBgn0034140	Lst	CG8317	37.7	8e-06
AAEL012522			5.28144	phosphate transporter	TRP	sodium-dependent phosphate transporter [Source:VB Community Annotation]	sodium-dependent phosphate transporter	N	major facilitator superfamily transporter 3	FBgn0031307	MFS3	CG4726	62.24	0
AAEL013350			4.85003	heat shock protein	RSM	heat shock protein 26kD, putative [Source:VB Community Annotation]	lethal(2)essential for life-like	N	Heat-Shock protein	FBgn0011296	l(2)efl	CG4533	38.67	2e-32
AAEL013349			4.64382	L2efl	RSM	lethal(2)essential for life protein, l2efl [Source:VB Community Annotation]	lethal(2)essential for life-like (chaperone)	N	Heat-Shock protein	FBgn0011296	l(2)efl	CG4533	48.63	4e-53
AAEL007830			3.5227	CYP4H29	RSM	cytochrome P450 [Source:VB Community Annotation]	cytochrome P450 4c3	N	cytochrome P450	FBgn0023541	Cyp4d14	CG3540	41.22	5e-126
AAEL013346			3.43705	L2efl	RSM	lethal(2)essential for life protein, l2efl [Source:VB Community Annotation]	lethal(2)essential for life-like (chaperone)	N	Heat-Shock protein	FBgn0011296	l(2)efl	CG4533	52.94	6e-63
AAEL012014			3.43319	L-lactate dehydrogenase	MET	L-lactate dehydrogenase [Source:UniProtKB/TrEMBL;Acc:Q16ND1]	l-lactate dehydrogenase	N	Ecdysone-inducible gene L3	FBgn0001258	ImpL3	CG10160	77.27	0
AAEL011038			3.33681	scab	DIV	integrin alpha-ps [Source:VB Community Annotation]	integrin alpha-ps	Y	scab, regulator of adhesion, signalling, polarity and cell migration	FBgn0003328	scb	CG8095	38.41	0
AAEL003728			3.25878	ankyrin	IMM		26s proteasome regulatory complex subunit psmd10	N	ankyrin 2, contributor to the regulation of short-term memory, sound perception, microtubule cytoskeleton and neuromuscular junction development and synapsis.	FBgn0261788	Ank2	CG42734	25.67	2e-15
AAEL001287			3.15649		DIV		hemolymph juvenile hormone binding	N	uncharacterized protein			CG14661	28.11	1e-31
AAEL006084			3.04124		UNK			Y	uncharacterized protein			CG34355	67.76	0
AAEL017976			3.0118	HSP70BB	RSM	heat shock protein HSP70 [Source:VB Community Annotation]	heat shock 70 A1-like	N	Heat-shock-protein	FBgn0013279	Hsp70Bc	CG6489	82.53	0
AAEL017977			2.93131	HSP70Ca	RSM	heat shock protein HSP70 [Source:VB Community Annotation]	heat shock 70 A1-like	N	Heat-shock-protein	FBgn0013279	Hsp70Bc	CG6489	82.68	0
AAEL003740			2.88984	ankyrin	IMM		integrin-linked kinase	N	ankyrin, induce accumulation of Ank and β-Spec at sites of cell-cell adhesion	FBgn0011747	Ank	CG1651	21.92	8e-09
AAEL006987			2.80591		MET		lipid phosphate phosphatase	N	uncharacterized protein	FBgn0037164	CG11438	CG11438	36.89	3e-20
AAEL017974			2.77866	HSP70Ab	RSM	heat shock protein HSP70 [Source:VB Community Annotation]	heat shock 70 A1-like	N	Heat-shock-protein	FBgn0013279	Hsp70Bc	CG6489	82.68	0
AAEL006784			2.71694	CYP9J17	RSM	cytochrome P450 [Source:VB Community Annotation]	probable cytochrome P450 9f2	N	Cytochrome P450	FBgn0038037	Cyp9f2	CG11466	44.51	8e-156
AAEL017975			2.70396	HSP70Ba	RSM	heat shock protein HSP70 [Source:VB Community Annotation]	heat shock 70 A1-like	N	Heat-shock-protein	FBgn0013279	Hsp70Bc	CG6489	82.68	0
AAEL005428			2.59344	probable salivary secreted peptide	UNK		probable salivary secreted peptide	Y	uncharacterized protein	FBgn0053998	CG33998	CG33998	42.11	1e-20
AAEL012017			2.45142		UNK		AAEL012017-PA	N
AAEL006480			2.42736		UNK			Y
AAEL007250			2.42195	comm2	APO	Protein commissureless 2 homolog [Source:UniProtKB/Swiss-Prot;Acc:Q172W0]	conserved plasma membrane	N	commissureless, autohagy in salivary glands	FBgn0259236	comm3	CG42334	41.96	2e-25
AAEL006041			2.41817	Phenylalanyl-tRNA synthetase	APO/IMM		leucine-rich repeat-containing 47	N	Phenylalanyl-tRNA synthetase, beta-subunit	FBgn0039175	beta-PheRS	CG5706	32.93	3e-17
AAEL003645			2.38555	stearoyl-coa desaturase	MET	stearoyl-coa desaturase [Source:VB Community Annotation]	stearoyl- desaturase 5-like isoform X2	N		FBgn0039756	CG9743	CG9743	58.05	9e-168
AAEL006126			2.36204		DIV		vitellogenin 1a	N
AAEL002576			2.30447	sodium symporter	TRP	sodium/solute symporter [Source:VB Community Annotation]	sodium iodide cotransporter	N	CG7720, isoform A	FBgn0038652	CG7720	CG7720	51.38	0
AAEL001749			2.30424	ventrhoid transmembrane protein	PROT	ventrhoid transmembrane protein, putative [Source:VB Community Annotation]	rhomboid-like isoform X1	N	stem cell tumor, isoform A	FBgn0020248	stet	CG33166	68.39	2e-172
AAEL009188			2.27274		CS		vegetative cell wall gp1	N
AAEL017980			2.23209	HSP70Ab	RSM	heat shock protein HSP70 [Source:VB Community Annotation]	heat shock 70 A1-like	N	Heat-shock-protein-70Bc	FBgn0013279	Hsp70Bc	CG6489	82.68	0
AAEL004581			2.20598		DIV		prion-like-(Q N-rich) domain-bearing 25 isoform X1	N	CG7381, isoform A	FBgn0038098	CG7381	CG7381	26.71	7e-06
AAEL001241			2.20473		UNK		PI-PLC X domain-containing 1-like isoform X2	Y	uncharacterized protein CG14945, isoform B	FBgn0032402	CG14945	CG14945	40.3	1e-119
AAEL004067			2.13927	mitochondrial benzodiazepine receptor	DIV	mitochondrial benzodiazepine receptor, putative [Source:VB Community Annotation]	translocator -like	N	translocator protein	FBgn0031263	Tspo	CG2789	57.39	6e-69
AAEL001471			2.12098	refractory to sigma P	DIV		AAEL001471-PA	N	refractory to sigma P, isoform A	FBgn0003231	ref(2)P	CG10360	33.33	9e-19
AAEL005666			2.09101	matric metalloproteinase 1	PROT	matrix metalloproteinase [Source:VB Community Annotation]	stromelysin-3-like isoform X1	Y	matrix metalloproteinase 1, isoform C	FBgn0035049	Mmp1	CG4859	65.26	0
AAEL001586			2.07695	glucosyl transferase	MET	glucosyl/glucuronosyl transferases [Source:VB Community Annotation]	glucosyl glucuronosyl transferase	Y	Ugt36Ba, isoform A	FBgn0040262	Ugt36Ba	CG13270	36.14	2e-108
AAEL003237			2.07612	tyrosine phosphatase	DIV	low molecular weight protein-tyrosine-phosphatase [Source:VB Community Annotation]	tyrosine phosphatase	N	uncharacterized protein CG31469	FBgn0051469	CG31469	CG31469	46.75	4e-47
AAEL010668			2.07473	quinone oxidoreductase	MET	quinone oxidoreductase [Source:VB Community Annotation]	synaptic vesicle membrane VAT-1 homolog-like	N	fatty acid synthase 3	FBgn0040001	FASN3	CG17374	22.78	2e-12
AAEL011641			2.07177	transferrin	DIV	transferrin [Source:VB Community Annotation]	isoform A	Y	transferrin 3	FBgn0034094	Tsf3	CG3666	28.12	1e-49
AAEL009055			2.06855	gliotactin	DIV	gliotactin [Source:VB Community Annotation]	cholinesterase-like isoform X1	N	gliotactin, isoform F	FBgn0001987	Gli	CG3903	67.44	0
AAEL017973			2.06321	HSP70Aa	RSM	heat shock protein HSP70 [Source:VB Community Annotation]	heat shock 70 A1-like	N	Heat-shock-protein-70Bc	FBgn0013279	Hsp70Bc	CG6489	82.84	0
AAEL010485			2.05426	sugar transporter	TRP	sugar transporter [Source:VB Community Annotation]	sugar transporter	N	CG1213, isoform C	FBgn0037387	CG1213	CG1213	46.14	9e-137
AAEL001062			2.02848		UNK		PREDICTED: uncharacterized protein LOC109404186	Y	uncharacterized protein CG16791, isoform B	FBgn0038881	CG16791	CG16791	22.27	5e-16
AAEL010417			2.00857		UNK		RNA 2 -phosphotransferase	N
AAEL005491			1.98441	ATP-binding cassette transporter	TRP	ABC transporter [Source:VB Community Annotation]	ABC transporter G family member 20-like	N	uncharacterized protein CG33970, isoform C	FBgn0053970	CG33970	CG33970	68.69	0
AAEL007342			1.98125		IMM		lipopolysaccharide-induced tumor necrosis factor-alpha factor homolog	N	uncharacterized protein CG13510, isoform A	FBgn0034758	CG13510	CG13510	52.94	4e-25
AAEL006774			1.96971	Fattyl acyl-coA reductase	MET	Fatty acyl-CoA reductase [Source:UniProtKB/TrEMBL;Acc:Q174U8]	fatty acyl- reductase CG5065	N	waterproof	FBgn0039620	wat	CG1443	43.46	1e-147
AAEL006006			1.92675	swiprosin	DIV	swiprosin [Source:VB Community Annotation]	EF-hand domain-containing D2 homolog	N	Swiprosin-1, isoform A	FBgn0032731	Swip-1	CG10641	76.4	9e-86
AAEL006330			1.91022	Akt1	DIV/APO	microtubule associated serine/threonine kinase [Source:VB Community Annotation]	microtubule-associated serine threonine- kinase 3 isoform X1	N	Akt1, isoform C	FBgn0010379	Akt1	CG4006	34.28	2e-62
AAEL005819			1.90931	threonine aldolase	DIV	l-allo-threonine aldolase [Source:VB Community Annotation]	probable low-specificity L-threonine aldolase 2	N	uncharacterized protein CG10184	FBgn0039094	CG10184	CG10184	61.46	9e-165
AAEL001104			1.89717	actin binding protein	DIV		drebrin isoform X2	N	actin binding protein 1	FBgn0036372	Abp1	CG10083	53.37	1e-68
AAEL004868			1.88091	hemomucin	BF	hemomucin [Source:VB Community Annotation]	adipocyte plasma membrane-associated -like	N	hemomucin	FBgn0015737	Hmu	CG3373	43.67	1e-122
AAEL013188			1.88031	cle7	UNK	cle7 [Source:VB Community Annotation]	UPF0568 C14orf166-like	N	uncharacterized protein CG31249	FBgn0051249	CG31249	CG31249	42.49	3e-59
AAEL008622			1.87749	jnk	IMM/APO	jnk [Source:VB Community Annotation]	mitogen-activated kinase 8	N	basket, isoform B	FBgn0000229	bsk	CG5680	55	2e-145
AAEL000080			1.86438	phosphoenolpyruvate carboxykinase	MET	phosphoenolpyruvate carboxykinase [Source:VB Community Annotation]	phosphoenolpyruvate carboxykinase [GTP]-like	N	phosphoenolpyruvate carboxykinase	FBgn0266488	CG45087	CG45087	69.83	0
AAEL008359			1.83894	limostatin	DIV		AAEL008359-PA	Y	limostatin, isoform C	FBgn0034140	Lst	CG8317	56.76	2e-07
AAEL006069			1.82715		DIV		archaeal vacuolar-type h+-atpase subunit i energy production and conversion	N	uncharacterized protein CG33111, isoform B	FBgn0053111	CG33111	CG33111	28.12	3e-28
AAEL000516			1.81493	juvenile hormone-inducible	DIV	juvenile hormone-inducible protein, putative [Source:VB Community Annotation]	juvenile hormone-inducible	N	juvenile hormone-inducible protein 26	FBgn0028424	JhI-26	CG3767	37.31	8e-75
AAEL015631			1.80471	asparagine synthetase	MET	asparagine synthetase [Source:VB Community Annotation]	asparagine synthetase B	N	asparagine synthetase	FBgn0270926	AsnS	CG33486	60.63	0
AAEL006795			1.79755	CYP9J15	RSM	cytochrome P450 [Source:VB Community Annotation]	cytochrome P450 9b2	N	Cyp9f2	FBgn0038037	Cyp9f2	CG11466	40.8	2e-136
AAEL008186			1.78586		DIV		arrestin domain-containing 17-like	N	uncharacterized protein CG18745	FBgn0042102	CG18745	CG18745	30.93	2e-54
AAEL006886			1.77289	growth arrest and DNA damage-inducible 45	APO/RSM		growth arrest and dna damage-inducible gadd45	N	growth arrest and DNA damage-inducible 45	FBgn0033153	Gadd45	CG11086	49.28	2e-45
AAEL010652			1.77002		RSM		synaptic vesicle membrane VAT-1 homolog-like	N
AAEL003462			1.76617	aromatic amino acid decarboxylase	MET	aromatic amino acid decarboxylase [Source:VB Community Annotation]	aromatic amino acid decarboxylase	N	tyrosine decarboxylase 1	FBgn0259977	Tdc1	CG30445	63.93	0
AAEL010675			1.75965		UNK		AAEL010675-PA	N
AAEL014229			1.75124		UNK		PREDICTED: uncharacterized protein LOC109433407	N	uncharacterized protein CG13566	FBgn0034942	CG13566	CG13566	39.39	3e-28
AAEL009404			1.74566	DNA-binding	RTT	DNA-binding protein smubp-2 [Source:VB Community Annotation]	helicase MOV-10	N	CG6701, isoform D	FBgn0033889	CG6701	CG6701	28.12	6e-78
AAEL011070			1.74547	CTLGA3	IMM	C-Type Lectin (CTL) - galactose binding. [Source:VB Community Annotation]	c-type lectin	Y	C-type lectin 27kD, isoform A	FBgn0031629	Clect27	CG3244	84.24	2e-132
AAEL013287			1.73665		DIV		cystatin	N	CG8066, isoform A	FBgn0038243	CG8066	CG8066	30.85	2e-08
AAEL007704			1.73176	lpp	DIV	lipoma preferred partner/lpp [Source:VB Community Annotation]	lipoma preferred partner lpp	N	zyxin, isoform L	FBgn0011642	Zyx	CG32018	48.32	2e-144
AAEL013438			1.71625	LIM domain-binding protein 3	CS	LIM domain-binding protein 3, putative [Source:VB Community Annotation]	adaptor enigma	N	Z band alternatively spliced PDZ-motif protein 52, isoform I	FBgn0265991	Zasp52	CG30084	46.14	9e-115
AAEL005992			1.71305	adam	PROT	adam (a disintegrin and metalloprotease) [Source:VB Community Annotation]	disintegrin and metallo ase domain-containing 12-like	Y	meltrin, isoform D	FBgn0265140	Meltrin	CG7649	38.04	0
AAEL010023			1.6868	thiamine pyrophosphate carrier	DIV		mitochondrial deoxynucleotide carrier	N	thiamine pyrophosphate carrier protein 1, isoform B	FBgn0037852	Tpc1	CG6608	48.17	6e-39
AAEL002010			1.68511		RTT		cell division cycle 123 homolog	N
AAEL004209			1.68486	opioid-binding cell adhesion	DIV	opioid-binding protein/cell adhesion molecule, putative [Source:VB Community Annotation]	opioid-binding cell adhesion	N	uncharacterized protein CG13506, isoform A	FBgn0034723	CG13506	CG13506	25.99	7e-34
AAEL013163			1.67258		UNK		conserved plasma membrane	N	CG1927, isoform B	FBgn0027547	CG1927	CG1927	32.29	8e-23
AAEL000147			1.66974	single-stranded DNA binding protein	DIV	single-stranded DNA binding protein, putative [Source:VB Community Annotation]	single-stranded DNA-binding mitochondrial	N	mitochondrial single stranded DNA-binding protein	FBgn0010438	mtSSB	CG4337	72.17	9e-62
AAEL007344			1.65501		UNK		membrane-associated motif in lps-induced tumor necrosis factor alpha factor	N	uncharacterized protein CG30273	FBgn0050269	CG30269	CG30269	40.83	1e-25
AAEL013223			1.65232		UNK		AAEL013223-PA	N
AAEL014138			1.6486	SRPN16	IMM	Serine Protease Inhibitor (serpin) likely cleavage at S/L. [Source:VB Community Annotation]	serpin B3-like	Y	serpin 28Dc	FBgn0031973	Spn28Dc	CG7219	33.57	1e-64
AAEL013047			1.64162	sphingolipid desaturase	MET	sphingolipid delta 4 desaturase/c-4 hydroxylase protein des2 [Source:VB Community Annotation]	sphingolipid delta(4)-desaturase DES1	N	infertile crescent, isoform A	FBgn0001941	ifc	CG9078	79.75	0
AAEL011158			1.60785	disulphide oxidoreductase	APO	disulfide oxidoreductase [Source:VB Community Annotation]	apoptosis-inducing factor 3-like isoform X1	N	CG4199, isoform A	FBgn0025628	CG4199	CG4199	51.02	0
AAEL012395			1.60686	ATP-binding cassette transporter	TRP	ATP-binding cassette transporter [Source:VB Community Annotation]	multidrug resistance-associated 4-like	N	uncharacterized protein CG11897, isoform A	FBgn0039644	CG11897	CG11897	51.96	0
AAEL011518			1.60527	Aspartyl-tRNA synthetase	RTT	aspartyl-tRNA synthetase [Source:VB Community Annotation]	aspartyl-tRNA synthetase	N	Aspartyl-tRNA synthetase, isoform A	FBgn0002069	AspRS	CG3821	82.96	0
AAEL005203			1.58084		UNK		UPF0553 C9orf64-like	N	CG9752	FBgn0034614	CG9752	CG9752	61.47	8e-163
AAEL007018			1.57507	UDP-glucose 4-epimerase	MET	udp-glucose 4-epimerase [Source:VB Community Annotation]	UDP-glucose 4-epimerase-like	N	UDP-galactose 4'-epimerase, isoform A	FBgn0035147	Gale	CG12030	57.43	2e-149
AAEL003599			1.57268	Sulfiredoxin	RSM	Sulfiredoxin [Source:UniProtKB/TrEMBL;Acc:Q17F23]	sulfiredoxin isoform X2	N	CG6762, isoform A	FBgn0030876	CG6762	CG6762	54.9	2e-52
AAEL010661			1.55125	Scramblase 1	MET	phospholipid scramblase 1, [Source:VB Community Annotation]	phospholipid scramblase 2-like isoform X1	N	scramblase 1, isoform B	FBgn0052056	scramb1	CG32056	75.54	2e-134
AAEL000811			1.5383	GPRMTH7	DIV	GPCR Methuselah Family [Source:VB Community Annotation]	probable G- coupled receptor Mth-like 14	N	methuselah-like 14	FBgn0052476	mthl14	CG32476	26.05	9e-31
AAEL006277			1.53172		UNK		conserved plasma membrane	Y	uncharacterized protein CG15673	FBgn0034639	CG15673	CG15673	43.82	1e-15
AAEL010247			1.53164		UNK		AAEL010247-PA	N	CG5913	FBgn0039385	CG5913	CG5913	31.44	2e-27
AAEL010411			1.5193	puckered	IMM/APO	dual specificity protein phosphatase [Source:VB Community Annotation]	dual specificity phosphatase 7-like	N	puckered, isoform A	FBgn0243512	puc	CG7850	67.24	8e-93
AAEL010757			1.51496		UNK		AAEL010757-PA	N	uncharacterized protein CG11122	FBgn0030266	CG11122	CG11122	41.09	9e-75
AAEL003348			1.51219		UNK		AAEL003348-PA	N	uncharacterized protein CG34398, isoform G	FBgn0085427	CG34398	CG34398	33.82	8e-122
AAEL018304			1.50869		TRP		sodium-neurotransmitter symporter	N	CG1698, isoform A	FBgn0033443	CG1698	CG1698	50.76	0
AAEL001573			1.50418	asrij	DIV		OCIA domain-containing 1	N	asrij, isoform A	FBgn0034793	asrij	CG13533	44.35	2e-66
AAEL000663			1.49742		DIV		MAPK regulated corepressor interacting 2	N	CG7841, isoform A	FBgn0036502	CG7841	CG7841	50	4e-51
AAEL004719			1.49629	inscuteable	DIV		AAEL004719-PA	N	inscuteable	FBgn0011674	insc	CG11312	39.73	4e-97
AAEL004116			1.48397		UNK		AAEL004116-PA	N
AAEL002848			1.48167	tubulin beta chain	CS	Tubulin beta chain (Fragment) [Source:UniProtKB/TrEMBL;Acc:Q17GX8]	tubulin beta-3 chain	N	beta-Tubulin at 60D, isoform A	FBgn0003888	betaTub60D	CG3401	95.4	0
AAEL001969			1.47554	ejaculatory bulb protein III	BF	protein serine/threonine kinase, putative [Source:VB Community Annotation]	insect pheromone-binding family	Y	ejaculatory bulb protein III, isoform A	FBgn0011695	EbpIII	CG11390	58.73	4e-52
AAEL009424			1.47042	serine/threonine kinase rio3	DIV	serine/threonine-protein kinase rio3 (rio kinase 3) [Source:VB Community Annotation]	serine threonine- kinase rio3	N	CG3008	FBgn0031643	CG3008	CG3008	50.87	0
AAEL018259			1.46203	xeroderma pigmentosum	DIV		DNA repair xp-c rad4	N	xeroderma pigmentosum, complementation group C, isoform C	FBgn0004698	Xpc	CG8153	50.29	9e-122
AAEL001392			1.45272		UNK		AAEL001392-PA	Y
AAEL007007			1.44383	DNA replication licensing factor MCM2	RTT	DNA replication licensing factor MCM2 [Source:VB Community Annotation]	DNA replication licensing factor Mcm2	N	minichromosome maintenance 2	FBgn0014861	Mcm2	CG7538	83.07	0
AAEL011821			1.43702	capulet	CS	adenylyl cyclase-associated protein [Source:VB Community Annotation]	adenylyl cyclase-associated 1 isoform X3	N	capulet, isoform C	FBgn0261458	capt	CG33979	71.86	6e-95
AAEL005071			1.43548	GTP binding protein	RTT	GTP binding protein [Source:VB Community Annotation]	translation elongation factor	N	CG2017, isoform D	FBgn0037391	CG2017	CG2017	73.48	0
AAEL011882			1.42766	trypsin-zeta	PROT	trypsin-zeta, putative [Source:VB Community Annotation]	venom peptide isomerase heavy chain-like	N	uncharacterized protein CG11911	FBgn0031249	CG11911	CG11911	31.73	6e-27
AAEL009260			1.42561	Rho GTPase activating protein	DIV		rho gtpase-activating	N	Rho GTPase activating protein at 19D, isoform A	FBgn0031118	RhoGAP19D	CG1412	38.24	0.0002
AAEL008891			1.42319	regulatory protein	RSM	regulatory protein, putative [Source:VB Community Annotation]	augmenter of liver regeneration	N	augmenter of liver regeneration, isoform B	FBgn0031068	Alr	CG12534	51.48	2e-56
AAEL001523			1.42317	secretory phospholipase A2	MET	secretory Phospholipase A2, putative [Source:VB Community Annotation]	PLA2: phospholipase A2	N	phospholipase A2 group III, isoform B	FBgn0030013	GIIIspla2	CG1583	51.85	3e-42
AAEL006754			1.41961	ankyrin repeat family	IMM		ankyrin repeat family (only homologues in albo and culex)	N	uncharacterized protein CG10011	FBgn0039590	CG10011	CG10011	23.02	8e-15
AAEL014606			1.41454	CYP9J7	RSM	cytochrome P450 [Source:VB Community Annotation]	probable cytochrome P450 9f2	N	Cyp9f2	FBgn0038037	Cyp9f2	CG11466	40.66	9e-135
AAEL001722			1.41349		DIV		serine-rich adhesin for platelets	N	uncharacterized protein CG31869, isoform A	FBgn0051869	CG31869	CG31869	41.67	2e-46
AAEL018236			1.40146	crossveinless	DIV		BMP-binding endothelial regulator -like	Y	crossveinless 2	FBgn0000395	cv-2	CG15671	48.18	0
AAEL008050			1.3956		UNK		AAEL008050-PA	N
AAEL004214			1.39359	stranded at second	DIV		epidermal cell surface receptor isoform X1	N	stranded at second, isoform A	FBgn0002306	sas	CG2507	66.59	0
AAEL007902			1.3927	PDGF- and VEGF-related factor 3	DIV		PREDICTED: uncharacterized protein LOC109420450 isoform X2	Y	PDGF- and VEGF-related factor 3, isoform E	FBgn0085407	Pvf3	CG34378	40.89	3e-52
AAEL007517			1.38194	oviductin	PROT	oviductin [Source:VB Community Annotation]	trypsin eta	N	CG4386	FBgn0034661	CG4386	CG4386	45.53	1e-80
AAEL000759			1.37724	gamma-glutamylcysteine synthetase	MET	gamma-glutamylcysteine synthetase, putative [Source:VB Community Annotation]	glutamate--cysteine ligase regulatory subunit-like	N	Glutamate-cysteine ligase modifier subunit, isoform A	FBgn0046114	Gclm	CG4919	40.48	2e-65
AAEL001039			1.37636	metaxin	APO	metaxin [Source:VB Community Annotation]	metaxin-1 homolog	N	CG9393, isoform A	FBgn0037710	CG9393	CG9393	37.54	2e-69
AAEL013128			1.37625	elongase	MET	elongase, putative [Source:VB Community Annotation]	elongation of very long chain fatty acids 6-like	N	baldspot, isoform B	FBgn0260960	Baldspot	CG3971	72.93	7e-171
AAEL008274			1.36788		UNK		conserved secreted precursor	Y
AAEL011023			1.36749		UNK		AAEL011023-PA	N	uncharacterized protein CG10979, isoform A	FBgn0037379	CG10979	CG10979	28.07	2e-82
AAEL002175			1.36592	interferon-related developmental regulator 2-like	IMM		interferon-related developmental regulator 2-like	N	uncharacterized protein CG31694	FBgn0051694	CG31694	CG31694	56.82	7e-174
AAEL006138			1.35606		DIV		VIT1_AEDAE ame: Full=Vitellogenin-A1 Short=VG ame: Full=PVG1 Contains: ame: Full=Vitellin light chain Short=VL Contains: ame: Full=Vitellin heavy chain Short=VH Flags: Precursor	Y					0	0
AAEL003954			1.34286	juvenile hormone-inducible	RTT	juvenile hormone-inducible protein, putative [Source:VB Community Annotation]	AAEL003954-PA	N	uncharacterized protein CG31300	FBgn0051300	CG31300	CG31300	30.37	3e-51
AAEL009623			1.33778	RNA 3' terminal phosphate cyclase	DIV	RNA 3' terminal phosphate cyclase [Source:VB Community Annotation]	RNA 3 -terminal phosphate cyclase	N	RNA 3'-terminal phosphate cyclase, isoform A	FBgn0025630	Rtca	CG4061	40.96	4e-89
AAEL000400			1.33452		UNK		AAEL000400-PA	N
AAEL009181			1.33348		UNK		AAEL009181-PA	Y
AAEL015237			1.32841	RNA 3' terminal phosphate cyclase	DIV		RNA 3 -terminal phosphate cyclase	N	RNA 3'-terminal phosphate cyclase, isoform A	FBgn0025630	Rtca	CG4061	41.39	3e-58
AAEL007997			1.3184		TRP		phosphatidylinositol transfer sec14	N	uncharacterized protein CG10657	FBgn0036289	CG10657	CG10657	58.12	2e-139
AAEL006978			1.31517	transglutaminase	DIV	protein-glutamine gamma-glutamyltransferase [Source:VB Community Annotation]	annulin isoform X1	N	transglutaminase, isoform A	FBgn0031975	Tg	CG7356	56.19	0
AAEL009249			1.30844	coronin	CS	coronin [Source:VB Community Annotation]	coronin-7 isoform X1	N	pod1, isoform F	FBgn0029903	pod1	CG4532	62.67	0
AAEL007238			1.30431		UNK		AAEL007238-PA	N	uncharacterized protein CG10527	FBgn0034583	CG10527	CG10527	40.16	2e-27
AAEL002644			1.3035		UNK		coiled-coil domain-containing 51-like	N
AAEL018117			1.30077		BF		salivary secreted mucin 3	Y	virus-induced RNA 1, isoform C	FBgn0043841	vir-1	CG31764	31.71	4e-13
AAEL015161			1.29413		DIV		vanin 2	Y	uncharacterized protein CG32751, isoform A	FBgn0052751	CG32751	CG32751	32.32	4e-66
AAEL006904			1.29183		UNK		AAEL006904-PA	N
AAEL003505			1.29085	c-Jun	IMM/APO	jun [Source:VB Community Annotation]	transcription factor AP-1-like	N	Jun-related antigen, isoform B	FBgn0001291	Jra	CG2275	49.6	1e-57
AAEL007547			1.28819	Chloride channel protein	TRP	Chloride channel protein [Source:UniProtKB/TrEMBL;Acc:Q171T6]	chloride channel 7	N	chloride channel-b	FBgn0033755	ClC-b	CG8594	61.76	0
AAEL001528			1.28511	phospholipase A2 group III	MET		phospholipase a2	N	phospholipase A2 group III, isoform B	FBgn0030013	GIIIspla2	CG1583	50.52	7e-30
AAEL009895			1.28088	neprilysin	PROT	neprilysin [Source:VB Community Annotation]	neprilysin isoform X3	N	neprilysin 2, isoform A	FBgn0027570	Nep2	CG9761	60.44	0
AAEL005683			1.27951		MET		beta-1,4-mannosyl-glyco 4-beta-N-acetylglucosaminyltransferase-like	N	uncharacterized protein CG31849	FBgn0051849	CG31849	CG31849	29.11	2e-44
AAEL000304			1.27763		CS		fibroin heavy chain-like isoform X2	Y	uncharacterized protein CG17549, isoform A	FBgn0032774	CG17549	CG17549	48.51	4e-08
AAEL007019			1.27441	phosphate transporter	TRP	Phosphate transporter [Source:UniProtKB/TrEMBL;Acc:Q173U8]	sodium-dependent phosphate transporter 2-like	N	Na[+]-dependent inorganic phosphate cotransporter type III, isoform A	FBgn0260795	NaPi-III	CG42575	59.8	0
AAEL002280			1.27348	ctl2	TRP	ctl2 [Source:VB Community Annotation]	choline transporter	N	uncharacterized protein CG11880, isoform C	FBgn0039637	CG11880	CG11880	49.91	3e-156
AAEL008497			1.27284		DIV		CKLF-like MARVEL transmembrane domain-containing 4	N	uncharacterized protein CG12730, isoform A	FBgn0029771	CG12730	CG12730	32.14	2e-13
AAEL005426			1.26386	annexin X	DIV	annexin x [Source:VB Community Annotation]	annexin B10-like	N	annexin B10, isoform A	FBgn0000084	AnxB10	CG9579	64.78	1e-145
AAEL012252			1.25722		TRP		potassium channel modulatory factor 1	N	uncharacterized protein CG11984, isoform H	FBgn0037655	CG11984	CG11984	43.1	3e-21
AAEL002757			1.25613		UNK		AAEL002757-PA	N
AAEL017473			1.25433		UNK		AAEL017473-PA	N
AAEL002851			1.25289	Tubulin beta chain	CS	Tubulin beta chain [Source:UniProtKB/TrEMBL;Acc:Q17GX9]	tubulin beta-1 chain	N	beta-Tubulin at 56D, isoform B	FBgn0284243	betaTub56D	CG9277	99.55	0
AAEL009842			1.25227	GALE12	DIV	Galectin [Source:UniProtKB/TrEMBL;Acc:Q16UP1]	keratinocyte lectin	N
AAEL009831			1.24925	Pyrroline-5-carboxylate reductase	MET	Pyrroline-5-carboxylate reductase [Source:UniProtKB/TrEMBL;Acc:Q1HRA6]	pyrroline-5-carboxylate reductase	N	Pyrroline-5-carboxylate reductase-like 2, isoform A	FBgn0038516	P5cr-2	CG5840	59.02	1e-109
AAEL011155			1.24882		DIV		required for meiotic nuclear division 1 homolog	N	uncharacterized protein CG11679	FBgn0030678	CG11679	CG11679	57.28	5e-127
AAEL001803			1.24723	kon-tiki	DIV		chondroitin sulfate proteoglycan 4-like	N	kon-tiki, isoform B	FBgn0032683	kon	CG10275	48.41	0
AAEL013079			1.24263	ankyrin	IMM		ankyrin repeat domain-containing 50	N	uncharacterized protein CG10011	FBgn0039590	CG10011	CG10011	59.18	0
AAEL006024			1.23688	vanin-like precursor	DIV	vanin-like protein 2 precursor, putative [Source:VB Community Annotation]	vanin 2	N	uncharacterized protein CG32751, isoform A	FBgn0052751	CG32751	CG32751	36.1	3e-83
AAEL000264			1.23366	phospholipase d	MET	phopholipase d [Source:VB Community Annotation]	phospholipase D2-like isoform X2	N	phospholipase D, isoform F	FBgn0033075	Pld	CG12110	54.56	0
AAEL007349			1.23339		IMM		lipopolysaccharide-induced tumor necrosis factor-alpha factor homolog isoform X2	N	uncharacterized protein CG42566, isoform B	FBgn0260768	CG42566	CG42566	55.41	1e-24
AAEL010769			1.23138	SRPN6	IMM	Serine Protease Inhibitor (serpin) likely cleavage at S/A. [Source:VB Community Annotation]	leukocyte elastase inhibitor-like	N	serpin 28Dc	FBgn0031973	Spn28Dc	CG7219	37.5	2e-67
AAEL007920			1.22533	Mob2	DIV		mob1 phocein	N	Mob2, isoform B	FBgn0259481	Mob2	CG11711	67.23	1e-161
AAEL011412			1.22229		UNK		switch-associated 70-like isoform X1	N
AAEL014531			1.22131	aip-1	DIV	arsenite inducuble RNA associated protein aip-1 [Source:VB Community Annotation]	AN1-type zinc finger 2A-like	N	uncharacterized protein CG12795	FBgn0031535	CG12795	CG12795	50.96	4e-83
AAEL018245			1.21872	Ubr3 ubiquitin ligase	DIV		e3 ubiquitin- ligase ubr3	N	Ubr3 ubiquitin ligase, isoform A	FBgn0260970	Ubr3	CG42593	57.12	0
AAEL011004			1.21722		UNK		conserved secreted precursor	N
AAEL003737			1.21398	ankyrin	IMM		integrin-linked kinase	N	ankyrin 2, isoform N	FBgn0261788	Ank2	CG42734	21.83	1e-09
AAEL000520			1.2106		RTT		juvenile hormone-inducible	N	CG5126	FBgn0031320	CG5126	CG5126	33.2	4e-37
AAEL000874			1.20937	Ark	APO	Apaf-1 Related Killer [Source:VB Community Annotation]	isoform A	N	Death-associated APAF1-related killer, isoform B	FBgn0263864	Dark	CG6829	25.39	1e-28
AAEL014366			1.20917		DIV		hemolymph juvenile hormone binding	Y	CG2016, isoform B	FBgn0250839	CG2016	CG2016	31.97	1e-43
AAEL001606			1.20579	GPRMTN	DIV	GPCR Melatonin Family [Source:VB Community Annotation]	trapped in endoderm-1	N	trapped in endoderm 1, isoform A	FBgn0046687	Tre1	CG3171	52.13	1e-90
AAEL003325			1.2036	Niemann-pic C1	IMM	niemann-pick C1 [Source:VB Community Annotation]	sterol-sensing domain of srebp cleavage-	Y	Niemann-Pick type C-1a, isoform A	FBgn0024320	Npc1a	CG5722	59.37	0
AAEL014657			1.19384		UNK		conserved plasma membrane	N	CG3740	FBgn0023530	CG3740	CG3740	55	2e-46
AAEL006233			1.1897		UNK		AAEL006233-PA	N
AAEL009645			1.18685		UNK		AAEL009645-PB	N
AAEL005641			1.18482	CTLGA5	IMM	C-Type Lectin (CTL) - galactose binding. [Source:VB Community Annotation]	galactose-specific C-type lectin	Y	triforce, isoform C	FBgn0035199	tfc	CG9134	38.52	5e-20
AAEL017275			1.18245		APO		programmed cell death 7-like isoform X1	N	CG1896	FBgn0039870	CG1896	CG1896	32.32	2e-08
AAEL005918			1.17538	ATP-binding cassette transporter	TRP	ATP-binding cassette transporter [Source:VB Community Annotation]	multidrug resistance-associated 4-like	N	CG7627, isoform A	FBgn0032026	CG7627	CG7627	43.67	0
AAEL008814			1.17459	Xrn1	DIV	5'-3' exoribonuclease 1 [Source:UniProtKB/TrEMBL;Acc:Q16XR0]	5 -3 exoribonuclease 1-like	N	pacman, isoform B	FBgn0020261	pcm	CG3291	45.89	0
AAEL004871			1.17419		UNK		AAEL004871-PA	N
AAEL000540			1.16384	fasciclin	DIV		fasciclin-3-like isoform X3	Y	fasciclin 3, isoform C	FBgn0000636	Fas3	CG5803	37.25	3e-73
AAEL008732			1.16182	tyrosine-protein kinase shark	DIV	tyrosine-protein kinase shark [Source:VB Community Annotation]	tyrosine- kinase shark-like isoform X2	N	SH2 ankyrin repeat kinase	FBgn0015295	Shark	CG18247	45.02	0
AAEL004854			1.15533		UNK		DAZ-associated 2-like	N
AAEL000638			1.15069		UNK		AAEL000638-PA, partial	N
AAEL011180			1.14646		UNK		isoform A	N	uncharacterized protein CG44250, isoform B	FBgn0265185	CG44250	CG44250	55.09	5e-104
AAEL001962			1.1402		TRP		transmembrane 184C-like	N	CG5850, isoform E	FBgn0032172	CG5850	CG5850	67.96	0
AAEL014718			1.13885	Sur-8	IMM	shoc2 [Source:VB Community Annotation]	leucine-rich repeat soc-2 homolog	N	Sur-8, isoform A	FBgn0038504	Sur-8	CG5407	76.85	0
AAEL012775			1.13825	easter-like	IMM	serine protease, putative [Source:VB Community Annotation]	serine protease easter-like	N	easter, isoform A	FBgn0000533	ea	CG4920	38.46	9e-30
AAEL008489			1.13216	calcyphosine	DIV	calcyphosine/tpp [Source:VB Community Annotation]	calcyphosine-like calmodulin domain	N	uncharacterized protein CG10126, isoform A	FBgn0038088	CG10126	CG10126	60.38	3e-87
AAEL012246			1.12737		UNK		AAEL012246-PA	N	uncharacterized protein CG12065, isoform B	FBgn0030052	CG12065	CG12065	69.27	0
AAEL001897			1.12714		UNK		conserved secreted precursor	Y
AAEL013182			1.12579	ATP-dependent RNA helicase	RTT	ATP-dependent RNA helicase [Source:VB Community Annotation]	ATP-dependent RNA helicase DHX57	N	CG1582, isoform A	FBgn0030246	CG1582	CG1582	58.53	0
AAEL002135			1.11915	tubulin-specific chaperone b	DIV	tubulin-specific chaperone b (tubulin folding cofactor b) [Source:VB Community Annotation]	tubulin-folding cofactor B-like	N	tubulin-binding cofactor B	FBgn0034451	TBCB	CG11242	50.83	2e-87
AAEL009574			1.1171	elongase	MET	elongase, putative [Source:VB Community Annotation]	elongation of very long chain fatty acids AAEL008004	N	uncharacterized protein CG31523, isoform C	FBgn0051523	CG31523	CG31523	70.98	4e-180
AAEL010434			1.11407	VGA1	DIV	vitellogenin-A1 precursor [Source:VB Community Annotation]	VIT1_AEDAE ame: Full=Vitellogenin-A1 Short=VG ame: Full=PVG1 Contains: ame: Full=Vitellin light chain Short=VL Contains: ame: Full=Vitellin heavy chain Short=VH Flags: Precursor	N
AAEL009931			1.10545	aip-1	DIV	arsenite inducuble RNA associated protein aip-1 [Source:VB Community Annotation]	AN1-type zinc finger 2A-like	N	uncharacterized protein CG12795	FBgn0031535	CG12795	CG12795	50.58	4e-82
AAEL013065			1.10241	thiamin pyrophosphokinase	DIV	thiamin pyrophosphokinase [Source:VB Community Annotation]	thiamin pyrophosphokinase	N	uncharacterized protein CG12567, isoform G	FBgn0039958	CG12567	CG12567	67.86	4e-161
AAEL004600			1.09284	Rho guanine nucleotide exchange factor	BF		mucin-19 isoform X1	N	Rho guanine nucleotide exchange factor at 64C, isoform A	FBgn0035574	RhoGEF64C	CG32239	50.28	0
AAEL005004			1.08819		UNK		AAEL005004-PA	N
AAEL006649			1.08542	Traf4	IMM	tnf receptor associated factor [Source:VB Community Annotation]	TNF receptor-associated factor 4	N	TNF-receptor-associated factor 4, isoform A	FBgn0026319	Traf4	CG3048	74.8	0
AAEL017483			1.08532	Niemman-pick C1	IMM		Niemann-Pick C1 isoform X3	N
AAEL001011			1.06197		UNK		transmembrane 43 homolog	N	CG8111	FBgn0035825	CG8111	CG8111	53.67	5e-119
AAEL016964			1.0591	glass	RTT		zinc finger 37-like	N	glass, isoform C	FBgn0004618	gl	CG7672	38.53	2e-20
AAEL000388			1.05389	isoleucyl tRNA synthetase	RTT	isoleucyl tRNA synthetase [Source:VB Community Annotation]	isoleucine--tRNA cytoplasmic-like	N	Isoleucyl-tRNA synthetase, isoform D	FBgn0027086	IleRS	CG11471	64.09	0
AAEL000003			1.05133		DIV		ubiquinone biosynthesis coq-8	N	uncharacterized protein CG32649	FBgn0052649	CG32649	CG32649	59.82	0
AAEL002840			1.05076		UNK		AAEL002840-PA	N
AAEL010360			1.04582	Cytosolic Fe-S cluster assembly factor NUBP1 homolog	APO	Cytosolic Fe-S cluster assembly factor NUBP1 homolog [Source:VB Community Annotation]	nucleotide-binding 1	N	uncharacterized protein CG17904	FBgn0032597	CG17904	CG17904	65.59	5e-135
AAEL007246			1.04396		UNK		AAEL007246-PA	N	uncharacterized protein CG32633, isoform A	FBgn0052633	CG32633	CG32633	32.99	9e-40
AAEL003698			1.03735		DIV		patched domain-containing 3-like	N	Patched-related, isoform A	FBgn0262867	Ptr	CG11212	23.26	5e-35
AAEL001147			1.03386	upSET	DIV		serine arginine repetitive matrix 2	N	upSET, isoform A	FBgn0036398	upSET	CG9007	37.39	1e-72
AAEL010731			1.02881		DIV		sorting nexin-21-like isoform X2	N	CG3077, isoform B	FBgn0031457	CG3077	CG3077	52.1	2e-107
AAEL001636			1.02638	shuttle craft	RTT	nuclear transcription factor, x-box binding 1 (nfx1) [Source:VB Community Annotation]	shuttle craft-like	N	shuttle craft, isoform B	FBgn0001978	stc	CG3647	57.06	0
AAEL003192			1.02561	mfs transporter	TRP	mfs transporter [Source:VB Community Annotation]	solute carrier family 22 member 7-like	N	CG7084, isoform B	FBgn0038938	CG7084	CG7084	40.82	1e-155
AAEL002748			1.02334	Aspartyl synthetase	RTT	aspartyl-tRNA synthetase [Source:VB Community Annotation]	aspartyl-tRNA synthetase	N	Aspartyl-tRNA synthetase, isoform A	FBgn0002069	AspRS	CG3821	82.96	0
AAEL013526			1.02267		CS		structural constituent of chitin-based	N	uncharacterized protein CG12814, isoform E	FBgn0037796	CG12814	CG12814	69.91	7e-103
AAEL014285			1.01836		DIV		growth hormone-inducible transmembrane	N	CG2076, isoform A	FBgn0030263	CG2076	CG2076	74.32	3e-94
AAEL006642			1.01722	Alpha tubulin	CS	Tubulin alpha chain [Source:UniProtKB/TrEMBL;Acc:Q1HR53]	tubulin alpha-1 chain	N	alpha-Tubulin at 84B	FBgn0003884	alphaTub84B	CG1913	99.11	0
AAEL000256			1.0144	SCRB9	DIV	Class B Scavenger Receptor (CD36 domain). [Source:VB Community Annotation]	scavenger receptor class B member 1 isoform X1	N	epithelial membrane protein, isoform B	FBgn0010435	emp	CG2727	70.76	0
AAEL008405			1.00978		UNK		conserved plasma membrane	N
AAEL005738			1.00438	yellow-b precursor	DIV	yellow protein precursor [Source:VB Community Annotation]	major royal jelly	Y	yellow-b, isoform A	FBgn0032601	yellow-b	CG17914	58.68	0
AAEL001731			1.00158	Dual specificity tyrosine-phosphorylation-regulated kinase	DIV	Dual specificity tyrosine-phosphorylation-regulated kinase [Source:VB Community Annotation]	dual specificity tyrosine-phosphorylation-regulated kinase 2-like isoform X1	N	Dual-specificity tyrosine phosphorylation-regulated kinase 3, isoform E	FBgn0027101	Dyrk3	CG40478	76.8	0
AAEL004553			0.997269		TRP		glycolipid transfer -like	N	CG6299, isoform B	FBgn0030640	CG6294	CG6294	39.02	3e-48
AAEL001787			0.995492	DNA photolyase	DIV	DNA photolyase [Source:VB Community Annotation]	deoxyribodipyrimidine photo-lyase-like isoform X2	N	photorepair, isoform B	FBgn0003082	phr	CG11205	63.69	0
AAEL003105			0.992358	supervilin	CS	supervillin [Source:VB Community Annotation]	supervillin isoform X8	N	uncharacterized protein CG45186, isoform X	FBgn0266696	CG45186	CG45186	50.85	0
AAEL014695			0.990164	Zinc finger protein	DIV	zinc finger protein [Source:VB Community Annotation]	zinc finger 43	N	uncharacterized protein CG31224, isoform A	FBgn0051224	CG31224	CG31224	56.66	6e-141
AAEL004651			0.98783	ankyrin repeat	IMM	multiple ankyrin repeats single kh domain protein [Source:VB Community Annotation]	ankyrin repeat and KH domain-containing mask-like	N	multiple ankyrin repeats single KH domain, isoform D	FBgn0043884	mask	CG33106	76.2	0
AAEL003044			0.986042	fasciclin-1 precursor	DIV	fasciclin-1 precursor [Source:VB Community Annotation]	fasciclin-1-like isoform X6	N	fasciclin 1, isoform A	FBgn0285925	Fas1	CG6588	51.96	0
AAEL001165			0.984062	son of sevenless	DIV	ras GTP exchange factor, son of sevenless [Source:VB Community Annotation]	guanine nucleotide exchange factor for ras-like small gtpase	N	Son of sevenless	FBgn0001965	Sos	CG7793	70.1	0
AAEL010558			0.97464		UNK		conserved plasma membrane	N	uncharacterized protein CG15449	FBgn0031146	CG15449	CG15449	52.46	9e-44
AAEL000822			0.97399	kinesin-like protein	CS	kinesin-like protein KLP68D [Source:VB Community Annotation]	kinesin KLP68D	N	Kinesin-like protein at 68D, isoform A	FBgn0004381	Klp68D	CG7293	60.88	0
AAEL015639			0.973066	transferrin	IMM/TRP/BF	transferrin [Source:VB Community Annotation]	transferrin precursor	Y	transferrin 1, isoform A	FBgn0022355	Tsf1	CG6186	49.65	8e-151
AAEL005513			0.972974	mothers against dpp	DIV	mothers against dpp protein [Source:VB Community Annotation]	mothers against dpp	N	mothers against dpp, isoform A	FBgn0011648	Mad	CG12399	84.71	0
AAEL008408			0.970048		UNK		transmembrane 77	N	CG4025	FBgn0025624	CG4025	CG4025	65.4	1e-115
AAEL003597			0.968456	leucine-rich transmenbrane protein	IMM	leucine-rich transmembrane protein [Source:VB Community Annotation]	platelet glyco V-like isoform X2	Y	CG7702, isoform B	FBgn0038638	CG7702	CG7702	40.52	4e-114
AAEL009616			0.968227	cadeherin	DIV	cadherin [Source:VB Community Annotation]	cadherin-related family member 2-like	N	cadherin 74A, isoform B	FBgn0036715	Cad74A	CG6445	56.14	0
AAEL017139			0.9606		UNK		conserved secreted precursor	Y	uncharacterized protein CG13639	FBgn0265266	CG13639	CG13639	55.56	3e-08
AAEL000450			0.958561	vacuolar peduncle	DIV	ras GTPase activating protein [Source:VB Community Annotation]	ras GTPase-activating 1-like	N	vacuolar peduncle, isoform D	FBgn0003969	vap	CG9209	81.17	0
AAEL013875			0.949376	tetraspanin	DIV	tetraspanin, putative [Source:VB Community Annotation]	23 kDa integral membrane -like isoform X1	N	tetraspanin 42Ed, isoform A	FBgn0029507	Tsp42Ed	CG12846	36.68	7e-48
AAEL011081			0.948654		UNK		HD domain-containing 2-like isoform X1	N	uncharacterized protein CG11050, isoform C	FBgn0031836	CG11050	CG11050	67.03	3e-90
AAEL009059			0.948604	Actin-related protein 2/3 complex	CS	arp2/3 complex 16 kd subunit (P16-arc) [Source:VB Community Annotation]	actin-related 2 3 complex subunit 5	N	Actin-related protein 2/3 complex, subunit 5, isoform A	FBgn0031437	Arpc5	CG9881	75.32	2e-79
AAEL008024			0.947794		DIV		serine threonine- kinase cst20 isoform x3	N	uncharacterized protein CG12991, isoform D	FBgn0030847	CG12991	CG12991	75.82	1e-38
AAEL005493			0.946212	septin 1	DIV	septin [Source:VB Community Annotation]	septins p-loop gtpase	N	septin 1	FBgn0011710	Sep	CG1403	85.17	0
AAEL002816			0.944845		UNK		zinc finger 37-like	N
AAEL012631			0.943653	myosin I	CS	myosin i [Source:VB Community Annotation]	myosin i	N	myosin 31DF, isoform B	FBgn0086347	Myo31DF	CG7438	71.53	0
AAEL000281			0.93932		UNK		conserved plasma membrane	N	uncharacterized protein CG43780, isoform B	FBgn0264302	CG43780	CG43780	58.28	8e-52
AAEL005667			0.938293	LIM domain-bidning protein	CS	LIM domain-binding protein, putative [Source:VB Community Annotation]	adaptor enigma	N	Z band alternatively spliced PDZ-motif protein 52, isoform I	FBgn0265991	Zasp52	CG30084	58	2e-114
AAEL008671			0.938226	Fission	RSM	Mitochondrial fission 1 protein [Source:UniProtKB/TrEMBL;Acc:Q16Y49]	mitochondrial fission 1	N	Fission, mitochondrial 1, isoform E	FBgn0039969	Fis1	CG17510	58.39	1e-49
AAEL011942			0.936845	Zinc finger protein	DIV	zinc finger protein [Source:VB Community Annotation]	gastrula zinc finger -like isoform X1	N	CG4360, isoform B	FBgn0038787	CG4360	CG4360	46.58	2e-59
AAEL012071			0.936742	ras	DIV	ras [Source:VB Community Annotation]	ras 1	N	Ras oncogene at 85D	FBgn0003205	Ras85D	CG9375	87.96	3e-113
AAEL008789			0.933925	apolipophorin-III	TRP	apolipophorin-III, putative [Source:VB Community Annotation]	apolipophorin-iii	Y
AAEL000884			0.931897	Elf2-alpha	RTT	eukaryotic translation initiation factor 2 alpha kinase 1 (heme-regulated eukaryotic initiation factor eif-2-alpha kinase) [Source:VB Community Annotation]	eukaryotic translation initiation factor 2-alpha kinase 1-like	N	pancreatic eIF-2alpha kinase, isoform B	FBgn0037327	PEK	CG2087	37.2	6e-23
AAEL011748			0.92932		DIV		hypothetical conserved	N	CG7071, isoform B	FBgn0260467	CG7071	CG7071	42.07	2e-66
AAEL018211			0.929187		DIV		phosphatase 2c	N	uncharacterized protein CG10376	FBgn0032702	CG10376	CG10376	33.68	6e-48
AAEL010555			0.926193	sterol regulatory element-binding protein	MET	sterol regulatory element-binding protein [Source:VB Community Annotation]	sterol regulatory element-binding 1	N	sterol regulatory element binding protein, isoform B	FBgn0261283	SREBP	CG8522	46.25	0
AAEL003843			0.925517		DIV		vATPase	Y
AAEL011168			0.921798	G protein alpha subunit	DIV	GTP-binding protein (i) alpha subunit, gnai [Source:VB Community Annotation]	G alpha i subunit	N	G protein alpha i subunit	FBgn0001104	Galphai	CG10060	86.09	0
AAEL001019			0.919433	translation elongation factor	RTT	translation elongation factor [Source:VB Community Annotation]	translation elongation factor	N	uncharacterized protein CG33158	FBgn0053158	CG33158	CG33158	51.44	0
AAEL010932			0.917533	RNAse H	DIV	RNAse h [Source:VB Community Annotation]	uncharacterized serine-rich -like isoform X2	N	prage, isoform D	FBgn0283741	prage	CG42666	50.77	1e-80
AAEL011197			0.914891	actin 5-C	CS	actin [Source:VB Community Annotation]	actin-5C	N	actin 5C, isoform A	FBgn0000042	Act5C	CG4027	100	0
AAEL008347			0.914002	monocarboxylate transporter	TRP	monocarboxylate transporter [Source:VB Community Annotation]	monocarboxylate transporter	N	CG8034, isoform A	FBgn0031011	CG8034	CG8034	57.81	0
AAEL002488			0.913263	DEAD box ATP-dependent RNA helicase	RTT	DEAD box ATP-dependent RNA helicase [Source:VB Community Annotation]	ATP-dependent RNA helicase Ddx1	N	Dead-box-1	FBgn0015075	Ddx1	CG9054	75.82	0
AAEL012421			0.912786	shotgun	DIV	cadherin [Source:VB Community Annotation]	DE-cadherin-like	N	shotgun	FBgn0003391	shg	CG3722	62.26	0
AAEL009583			0.908853	cheerio	CS	filamin, putative [Source:VB Community Annotation]	filamin-A isoform X2	N	cheerio, isoform M	FBgn0014141	cher	CG3937	68.71	0
AAEL011271			0.907168	ALG-2 interacting protein X	APO	programmed cell death 6-interacting protein [Source:VB Community Annotation]	programmed cell death 6-interacting	N	ALG-2 interacting protein X	FBgn0086346	ALiX	CG12876	60.4	0
AAEL000393			0.905274	suppressor of cytokine signalling	IMM	suppressors of cytokine signalling [Source:VB Community Annotation]	suppressor of cytokine signaling 5	N	suppressor of cytokine signaling at 36E, isoform A	FBgn0041184	Socs36E	CG15154	75.42	1e-95
AAEL001133			0.904719	Autophagy-related 14	APO		beclin 1-associated autophagy-related key regulator-like	N	Autophagy-related 14	FBgn0039636	Atg14	CG11877	37.66	2e-79
AAEL013749			0.903266	rhomboid-7	PROT		presenilins-associated rhomboid mitochondrial	N	rhomboid-7, isoform A	FBgn0033672	rho-7	CG8972	50.78	2e-110
AAEL018144			0.899482	tribbles	DIV		pseudokinase domain of tribbles	N	tribbles	FBgn0028978	trbl	CG5408	42.47	9e-64
AAEL012941			0.89625		DIV		E3 ubiquitin- ligase MARCH5	N	CG9855, isoform A	FBgn0037242	CG9855	CG9855	55.11	7e-128
AAEL002516			0.893595		DIV		E3 ubiquitin- ligase MARCH5	N	CG9855, isoform A	FBgn0037242	CG9855	CG9855	55.11	4e-128
AAEL010488			0.889254	ets	RTT	ets [Source:VB Community Annotation]	ets DNA-binding pokkuri-like	N	anterior open, isoform A	FBgn0000097	aop	CG3166	51.58	2e-80
AAEL005846			0.88903	multivesicular body subunit	UNK		multivesicular body subunit 12B-like	N	multivesicular body subunit 12, isoform B	FBgn0030894	Mvb12	CG7192	48.23	8e-93
AAEL008388			0.884483	ATP-binding cassette sub-family A member 3	TRP	ATP-binding cassette sub-family A member 3, putative [Source:VB Community Annotation]	ATP-binding cassette sub-family A member 3	N	CG1718, isoform D	FBgn0031170	CG1718	CG1718	44.63	0
AAEL012466			0.880414	myospheroid	DIV	integrin beta subunit [Source:VB Community Annotation]	integrin beta-PS isoform X1	Y	myospheroid, isoform A	FBgn0004657	mys	CG1560	62.5	0
AAEL003957			0.876536		CS		cofilin actin-depolymerizing factor homolog	N	twinstar	FBgn0011726	tsr	CG4254	97.3	8e-104
AAEL008768			0.874918	multiprotein binding factor	RTT	multiprotein bridging factor, putative [Source:VB Community Annotation]	transcription factor MBF1	N	multiprotein bridging factor 1, isoform B	FBgn0262732	mbf1	CG4143	79.17	5e-80
AAEL002130			0.871716	Ecdysone-inducible	DIV	ecdysone inducible protein L2, putative [Source:VB Community Annotation]	neural ectodermal development factor IMP-L2	Y	Ecdysone-inducible gene L2, isoform B	FBgn0001257	ImpL2	CG15009	35.82	1e-53
AAEL009295			0.869448	lachesin	CS	lachesin [Source:VB Community Annotation]	lachesin	Y	lachesin	FBgn0010238	Lac	CG12369	75.44	0
AAEL004504			0.86716	valcyclovir hydrolase	PROT	valacyclovir hydrolase [Source:VB Community Annotation]	probable serine hydrolase	N	CG7632, isoform A	FBgn0037071	CG7632	CG7632	50.67	2e-107
AAEL003974			0.864109	Calpain	PROT		calpain B	N	Calpain-A, isoform A	FBgn0012051	CalpA	CG7563	35.09	1e-56
AAEL009470			0.86295		PROT		ubiquitin carboxyl-terminal hydrolase FAM188A homolog	N	CG7332, isoform A	FBgn0030973	CG7332	CG7332	57.2	0
AAEL009345			0.85885	prohibitin	DIV	prohibitin [Source:VB Community Annotation]	l(2)37Cc	N	lethal (2) 37Cc, isoform A	FBgn0002031	l(2)37Cc	CG10691	86.72	2e-175
AAEL011314			0.858614	Epoxide hydrolase	PROT	Epoxide hydrolase [Source:UniProtKB/TrEMBL;Acc:Q16QD6]	juvenile hormone epoxide hydrolase 1	Y	juvenile hormone epoxide hydrolase 2, isoform D	FBgn0034405	Jheh2	CG15102	54.51	0
AAEL009074			0.858156	IAP1	APO	Inhibitor of Apoptosis (IAP) containing Baculoviral IAP Repeat(s) (BIR domains). [Source:VB Community Annotation]	inhibitor of apoptosis 1	N	Death-associated inhibitor of apoptosis 1, isoform C	FBgn0260635	Diap1	CG12284	44.5	1e-105
AAEL005380			0.857652	mll	RTT	mixed-lineage leukemia protein, mll [Source:VB Community Annotation]	histone-lysine N-methyltransferase 2C-like isoform X2	N	trithorax-related, isoform C	FBgn0023518	trr	CG3848	45.5	0
AAEL008340			0.856503	neuroglian	DIV	cell adhesion molecule [Source:VB Community Annotation]	neuronal cell adhesion	N	neuroglian, isoform C	FBgn0264975	Nrg	CG1634	66.78	0
AAEL004438			0.853963	Roe1	DIV	GrpE protein homolog [Source:UniProtKB/TrEMBL;Acc:Q17CT4]	grpE mitochondrial-like	N	Roe1	FBgn0014877	Roe1	CG6155	63.59	8e-81
AAEL013768			0.852362	glia maturation factor	DIV	glial maturation factor [Source:VB Community Annotation]	glia maturation factor beta	N	glia maturation factor	FBgn0028894	GMF	CG5869	71.01	2e-70
AAEL018299			0.851943		DIV		DENN domain-containing 1A isoform X4	N	uncharacterized protein CG18659, isoform D	FBgn0027561	CG18659	CG18659	45.22	0
AAEL011778			0.851303	flare	CS	WD-repeat protein [Source:VB Community Annotation]	wd40 repeat stress actin	N	flare, isoform A	FBgn0260049	flr	CG10724	78.76	0
AAEL008138			0.851224	ATP-binding cassette transporter	TRP	ABC transporter [Source:VB Community Annotation]	ATP-binding cassette sub-family G member 4-like isoform X1	N	ABC transporter expressed in trachea, isoform B	FBgn0020762	Atet	CG2969	63.97	0
AAEL017085			0.850822	GSTO1	RSM	glutathione transferase [Source:VB Community Annotation]	glutathione S-transferase	N	glutathione S transferase O3	FBgn0035904	GstO3	CG6776	50.6	3e-87
AAEL009125			0.850133	CYP6M10	RSM	cytochrome P450 [Source:VB Community Annotation]	probable cytochrome P450 6a14	N	Cyp6a14, isoform C	FBgn0033302	Cyp6a14	CG8687	44.6	2e-153
AAEL002397			0.849617		UNK		isoform A	N	uncharacterized protein CG31344	FBgn0051344	CG31344	CG31344	34.85	2e-41
AAEL009102			0.845853	crumbs	DIV	crumbs [Source:VB Community Annotation]	crumbs-like isoform X5	N	crumbs, isoform A	FBgn0259685	crb	CG6383	58.44	0
AAEL001032			0.845771		TRP		nuclear pore complex	N	uncharacterized protein CG14712	FBgn0037924	CG14712	CG14712	29.46	2e-30
AAEL008565			0.845619	metalloprotease	PROT	metalloprotease m41 ftsh [Source:VB Community Annotation]	AFG3 2	N	CG6512, isoform A	FBgn0036702	CG6512	CG6512	72.91	0
AAEL000199			0.845253	Arginyl-tRNA synthetase	RTT	arginyl-tRNA synthetase [Source:VB Community Annotation]	probable arginine--tRNA cytoplasmic	N	Arginyl-tRNA synthetase	FBgn0027093	ArgRS	CG9020	62.05	0
AAEL006740			0.842072		UNK		conserved secreted precursor	Y	uncharacterized protein CG10217, isoform B	FBgn0039113	CG10217	CG10217	50	3e-47
AAEL004147			0.839188	tetraspanin 3A	DIV	tetraspanin, putative [Source:VB Community Annotation]	tetraspanin-33-like	N	tetraspanin 3A, isoform A	FBgn0040334	Tsp3A	CG10742	77.32	7e-143
AAEL005305			0.83823	mrj	TRP		dnaj molecular chaperone similarity domain	N	mrj, isoform D	FBgn0034091	mrj	CG8448	53.96	3e-84
AAEL002412			0.837523	monocarboxylate transporter	TRP	monocarboxylate transporter [Source:VB Community Annotation]	monocarboxylate transporter 12-like	N	uncharacterized protein CG11665, isoform A	FBgn0033028	CG11665	CG11665	57.46	0
AAEL008664			0.836993		PROT		abhydrolase domain-containing 4	N	CG1882, isoform A	FBgn0033226	CG1882	CG1882	63.31	5e-165
AAEL004632			0.836491	ankyrin repeat	IMM		ankyrin repeat and KH domain-containing mask-like	N
AAEL011423			0.835853	sugar transporter	TRP	sugar transporter [Source:VB Community Annotation]	facilitated trehalose transporter Tret1	N	CG4797	FBgn0034909	CG4797	CG4797	47.36	2e-153
AAEL004517			0.835335		UNK		conserved secreted precursor	Y	CG6583	FBgn0032420	CG6583	CG6583	75	3e-65
AAEL006038			0.834984	WD-repeat protein	CS	WD-repeat protein [Source:VB Community Annotation]	PH-interacting -like	N	BRWD3	FBgn0011785	BRWD3	CG31132	61.98	0
AAEL003445			0.833899		UNK		AAEL003445-PA	N	CG9646, isoform A	FBgn0034184	CG9646	CG9646	67.33	0
AAEL000615			0.83377		BF		possible mucin	Y
AAEL006912			0.828306	acetyl-coa acetyltransferase 2	MET	acetyl-coa acetyltransferase 2, [Source:VB Community Annotation]	acetyl-coA acetyl transferase II	N	CG9149	FBgn0035203	CG9149	CG9149	68.48	0
AAEL001476			0.825824	numb	DIV		numb-like isoform X1	N	numb, isoform A	FBgn0002973	numb	CG3779	57.7	0
AAEL006133			0.825162	cofactor A	CS	cofactor A, putative [Source:VB Community Annotation]	tubulin-specific chaperone A	N	CG1890	FBgn0039869	CG1890	CG1890	58.33	9e-40
AAEL004363			0.819508	capicua	RTT		transcription factor capicua mitochondrion	N	capicua, isoform D	FBgn0262582	cic	CG43122	44.03	2e-93
AAEL008128			0.817597	mitochondrial inner membrane protein translocase	TRP	mitochondrial inner membrane protein translocase, 13kD-subunit, putative [Source:VB Community Annotation]	Mitochondrial import inner membrane translocase subunit Tim13	N	uncharacterized protein CG34132	FBgn0083968	CG34132	CG34132	76.54	4e-41
AAEL010777			0.816308	thioreduxin-2	RSM	thioredoxin (TRX), putative [Source:VB Community Annotation]	AF394233_1 thioredoxin	N	thioredoxin-2, isoform B	FBgn0040070	Trx-2	CG31884	60.61	9e-40
AAEL013250			0.81374		DIV		TBC1 domain family	N	CG8155	FBgn0034009	CG8155	CG8155	48.59	0
AAEL008491			0.813256		UNK		AAEL008491-PA	N	CG8270	FBgn0035703	CG8270	CG8270	53.99	0
AAEL004513			0.813122	neurotransmitter gated ion channel	TRP	neurotransmitter gated ion channel [Source:VB Community Annotation]	cation transporter family	N	CG6927	FBgn0029733	CG6927	CG6927	60.98	0
AAEL015615			0.811541		RTT		zinc finger	N	uncharacterized protein CG31224, isoform A	FBgn0051224	CG31224	CG31224	46.81	4e-08
AAEL004922			0.810908	nicotinate phosphoribosyltransferase	MET	nicotinate phosphoribosyltransferase [Source:VB Community Annotation]	nicotinate phosphoribosyltransferase	N	CG3714, isoform G	FBgn0031589	CG3714	CG3714	82.26	1e-102
AAEL009909			0.810083	cln3	DIV	cln3/battenin [Source:VB Community Annotation]	cln3 battenin	N	cln3, isoform A	FBgn0036756	cln3	CG5582	55.88	8e-165
AAEL006922			0.805315	calponin transgelin	CS	calponin/transgelin [Source:VB Community Annotation]	calponin transgelin	N	Chd64, isoform B	FBgn0035499	Chd64	CG14996	82.98	2e-113
AAEL012973			0.804774	uracil phosphoribosyltransferase	MET	uracil phosphoribosyltransferase [Source:VB Community Annotation]	uracil phosphoribosyltransferase homolog	N	krishah, isoform A	FBgn0035639	kri	CG5537	83.98	1e-130
AAEL017546			0.800866	WNk kinase	DIV		serine threonine	Y	Wnk kinase, isoform O	FBgn0037098	Wnk	CG7177	72.11	0
AAEL005871			0.796182		DIV		nascent polypeptide-associated complex subunit muscle-specific form-like	N	uncharacterized protein CG14073, isoform B	FBgn0036814	CG14073	CG14073	35.13	6e-78
AAEL001914			0.790727	scavenger receptor	TRP	scavenger receptor, putative [Source:VB Community Annotation]	bark beetle isoform X1	N	bark beetle, isoform A	FBgn0031571	bark	CG3921	56.97	0
AAEL013063			0.789738	Autophagy-related 18A	APO	autophagy related gene [Source:VB Community Annotation]	with signal anchor	N	Autophagy-related 18b, isoform A	FBgn0032935	Atg18b	CG8678	51.55	2e-133
AAEL005910			0.789036	programmed cell death protein	APO	programmed cell death protein [Source:VB Community Annotation]	programmed cell death 6-like	N	Apoptosis-linked gene-2	FBgn0086378	Alg-2	CG40410	80.81	1e-105
AAEL014828			0.788935		UNK		PREDICTED: uncharacterized protein LOC109428950	Y	iris	FBgn0031305	Iris	CG4715	20.85	7e-07
AAEL011302			0.788838	Annexin B9	DIV	Annexin [Source:UniProtKB/TrEMBL;Acc:Q16QE7]	annexin B9-like isoform X5	N	annexin B9, isoform D	FBgn0000083	AnxB9	CG5730	81.79	0
AAEL001904			0.787458	Actin-related protein 2/3 complex	CS	Arp2/3 complex 34 kDa subunit [Source:UniProtKB/TrEMBL;Acc:Q17JV8]	actin-related 2 3 complex subunit 2	N	Actin-related protein 2/3 complex, subunit 2, isoform A	FBgn0032859	Arpc2	CG10954	86.09	0
AAEL007990			0.786173	Sh3beta	DIV	SH3 domain-binding glutamic acid-rich-like protein [Source:UniProtKB/TrEMBL;Acc:A0A1S4FIE8]	starmaker-like isoform X1	N	Sh3beta, isoform A	FBgn0035772	Sh3beta	CG8582	65.52	4e-54
AAEL018139			0.785045	locomotion defects	DIV		regulator of g-	N	locomotion defects, isoform D	FBgn0020278	loco	CG5248	42.24	0
AAEL008484			0.785007	steroid receptor-interacting snf2 domain protein	RTT	steroid receptor-interacting snf2 domain protein [Source:VB Community Annotation]	steroid receptor-interacting snf2 domain	N	CG4049	FBgn0034976	CG4049	CG4049	57.74	0
AAEL005792			0.783907	CLIPE8	BF/IMM	Clip-Domain Serine Protease family E. Protease homologue. [Source:VB Community Annotation]	trypsin-like serine protease	N	hayan, isoform A	FBgn0030925	Hayan	CG6361	23.38	8e-16
AAEL007765			0.779818	SRPN10	IMM/APO	Serine Protease Inhibitor (serpin) likely cleavage at K/R. Transcript A. [Source:VB Community Annotation]	serine protease inhibitor 42Dd-like isoform X5	N	serpin 42Da, isoform A	FBgn0265137	Spn42Da	CG9453	43.62	8e-107
AAEL005052			0.779725	Tubulin beta chain	CS	Tubulin beta chain [Source:UniProtKB/TrEMBL;Acc:Q17B46]	tubulin beta chain isoform X1	N	beta-Tubulin at 97EF, isoform B	FBgn0003890	betaTub97EF	CG4869	87.19	0
AAEL010407			0.77559		UNK		conserved plasma membrane	N	CG1103, isoform A	FBgn0037235	CG1103	CG1103	51.33	4e-69
AAEL004545			0.775516		UNK		CAS1 domain containing 1	N	CG2938, isoform B	FBgn0029685	CG2938	CG2938	60.69	0
AAEL013756			0.77473	Zinc/iron transporter	TRP	zinc/iron transporter [Source:VB Community Annotation]	zinc transporter ZIP1-like isoform X1	N	Zinc/iron regulated transporter-related protein 88E	FBgn0038312	Zip88E	CG4334	39.63	1e-66
AAEL012282			0.772538	prohibitin 2	DIV	prohibitin [Source:VB Community Annotation]	prohibitin-2-like isoform X1	N	prohibitin 2, isoform C	FBgn0010551	Phb2	CG15081	84.07	5e-169
AAEL006032			0.770768	trabid	DIV		OTU domain-containing 7A	N	trabid	FBgn0037734	trbd	CG9448	27.86	6e-24
AAEL009984			0.770679	alanyl-tRNA synthetase	RTT	alanyl-tRNA synthetase [Source:VB Community Annotation]	alanyl-trna synthetase domain-containing 1	N	uncharacterized protein CG10802, isoform A	FBgn0029664	CG10802	CG10802	46.65	2e-119
AAEL008069			0.767658	notch	DIV	notch [Source:VB Community Annotation]	von Willebrand factor type EGF and pentraxin domain-containing 1 isoform X1	Y	uninflatable, isoform F	FBgn0031879	uif	CG9138	74.45	0
AAEL009037			0.765033	G protein alpha i subunit	DIV	GTP-binding protein (i) alpha subunit, gnai [Source:VB Community Annotation]	G alpha i subunit	N	G protein alpha i subunit	FBgn0001104	Galphai	CG10060	88.17	3e-49
AAEL013525			0.762856	Timp-3	DIV	Timp-3, putative [Source:VB Community Annotation]	tissue inhibitor of metalloproteases-like	Y	tissue inhibitor of metalloproteases	FBgn0025879	Timp	CG6281	38.67	1e-49
AAEL002350			0.762768		UNK		growth and transformation-dependent	N	CG9231, isoform A	FBgn0036887	CG9231	CG9231	52	6e-38
AAEL009093			0.759806	crumbs	DIV	crumbs [Source:VB Community Annotation]	crumbs-like isoform X4	N	crumbs, isoform A	FBgn0259685	crb	CG6383	53	0
AAEL018119			0.759468		UNK		FAM49B-like	N	uncharacterized protein CG32066, isoform C	FBgn0052066	CG32066	CG32066	83.33	0
AAEL012187			0.758412	lethal (3) malignant brain tumor	DIV	lethal(3)malignant brain tumor [Source:VB Community Annotation]	lethal(3)malignant brain tumor 3 isoform X2	N	lethal (3) malignant brain tumor	FBgn0002441	l(3)mbt	CG5954	37.3	3e-144
AAEL005872			0.758055		UNK		AAEL005872-PB	N
AAEL007546			0.757523	Actin-related protein 2/3 complex	CS	actin-related protein 2/3 complex subunit 1A [Source:VB Community Annotation]	actin-related 2 3 complex subunit 1A-like	N	Actin-related protein 2/3 complex, subunit 1, isoform B	FBgn0001961	Arpc1	CG8978	74.07	0
AAEL000706			0.756672	lace	MET	serine palmitoyltransferase [Source:VB Community Annotation]	serine palmitoyltransferase 2	N	lace, isoform A	FBgn0002524	lace	CG4162	77.66	0
AAEL005378			0.755876	set domain protein	RTT	set domain protein [Source:VB Community Annotation]	histone-lysine N-methyltransferase 2C-like isoform X3	N	lost PHDs of trr, isoform A	FBgn0263667	Lpt	CG5591	44.58	0
AAEL013092			0.755849	cation chloride cotransporter	TRP	cation chloride cotransporter [Source:VB Community Annotation]	solute carrier family 12 member 9-like isoform X1	N	uncharacterized protein CG10413, isoform A	FBgn0032689	CG10413	CG10413	64.76	0
AAEL004865			0.754578	cyclin g	DIV	cyclin g [Source:VB Community Annotation]	cyclin G-like	N	cyclin G, isoform D	FBgn0039858	CycG	CG11525	49.85	1e-105
AAEL003493			0.753076	GDI interacting protein	DIV	GDI interacting protein, putative [Source:VB Community Annotation]	UBX domain-containing 1	N	GDI interacting protein 3, isoform E	FBgn0259202	CG42306	CG42306	51.91	9e-152
AAEL009658			0.752191	trehalase	MET	alpha,alpha-trehalase [Source:VB Community Annotation]	trehalase-like isoform X3	Y	trehalase, isoform F	FBgn0003748	Treh	CG9364	56.55	0
AAEL005881			0.749753	amfr	DIV	autocrine motility factor receptor, amfr [Source:VB Community Annotation]	E3 ubiquitin- ligase AMFR-like isoform X1	N	septin interacting protein 3, isoform A	FBgn0039875	sip3	CG1937	30.52	5e-18
AAEL007650			0.749555	chaperonin	DIV	chaperonin [Source:VB Community Annotation]	t-complex 1 subunit beta	N	CG7033	FBgn0030086	CG7033	CG7033	84.62	0
AAEL004834			0.748177	rhinoceros	DIV	PHD finger protein [Source:VB Community Annotation]	PHD finger rhinoceros-like isoform X1	N	rhinoceros, isoform B	FBgn0035106	rno	CG7036	63.48	0
AAEL012291			0.74614		UNK		24 kda salivary	Y	CG7453	FBgn0030991	CG7453	CG7453	28.65	3e-19
AAEL009937			0.745855	varicose	DIV	calcium/calmodulin-dependent serine protein kinase membrane-associated guanylate kinase (cask) [Source:VB Community Annotation]	MAGUK p55 subfamily member 6-like isoform X3	N	varicose, isoform E	FBgn0250785	vari	CG9326	63.18	0
AAEL006370			0.744281	amsh	DIV	amsh [Source:VB Community Annotation]	STAM-binding -like	N	CG2224, isoform A	FBgn0039773	CG2224	CG2224	56.46	3e-159
AAEL000634			0.74217	ceramide glucosyltransferase	MET	ceramide glucosyltransferase [Source:VB Community Annotation]	ceramide glucosyltransferase	N	ceramide glucosyltransferase	FBgn0067102	GlcT-1	CG6437	69.03	0
AAEL001698			0.740801	shrub	TRP	charged multivesicular body protein 4b [Source:VB Community Annotation]	charged multivesicular body 4b	N	shrub	FBgn0086656	shrb	CG8055	68.28	7e-102
AAEL012293			0.739898	Anoctamin	TRP	Anoctamin [Source:UniProtKB/TrEMBL;Acc:Q16MH2]	anoctamin-5-like isoform X1	N	uncharacterized protein CG10353, isoform C	FBgn0030349	CG10353	CG10353	49.56	0
AAEL013255			0.738892		DIV		growth hormone-inducible transmembrane	N	CG1287	FBgn0037506	CG1287	CG1287	42.96	8e-25
AAEL009894			0.738116	LRIM21	DIV	leucine-rich immune protein (Coil-less) [Source:VB Community Annotation]	mitotic phosphatase 1 regulator	N	rickets	FBgn0003255	rk	CG8930	32.06	2e-07
AAEL011217			0.736221		TRP		PQ-loop repeat-containing 3-like	N	CG1265	FBgn0035517	CG1265	CG1265	54.85	3e-71
AAEL002900			0.735525		DIV		osteopetrosis-associated transmembrane 1-like	Y	uncharacterized protein CG14969	FBgn0035440	CG14969	CG14969	28.14	3e-21
AAEL003006			0.732416	2-deoxyglucose-6-phosphate phosphatase	MET	2-deoxyglucose-6-phosphate phosphatase [Source:VB Community Annotation]	probable pseudouridine-5 -phosphatase isoform X2	N	GS1-like, isoform A	FBgn0019982	Gs1l	CG15441	62.5	1e-95
AAEL002295			0.730148	leucine-rich transmembrane	IMM	leucine-rich transmembrane protein [Source:VB Community Annotation]	leucine-rich transmembrane	Y	CG5096	FBgn0032235	CG5096	CG5096	37.94	4e-108
AAEL003569			0.729928	Acyl-co thioesterase	MET	acyl-coa thioesterase [Source:VB Community Annotation]	acyl-coenzyme A thioesterase 9	N	CG1635	FBgn0039854	CG1635	CG1635	57.28	5e-179
AAEL012701			0.725106	ATP-binding cassette sub-family A member 3	DIV	ATP-binding cassette sub-family A member 3, putative [Source:VB Community Annotation]	ATP-binding cassette sub-family A member 3-like	N	CG1718, isoform C	FBgn0031170	CG1718	CG1718	38.92	0
AAEL014064			0.724765	glutaredoxin	RSM	glutaredoxin, putative [Source:VB Community Annotation]	thioredoxin domain-containing 17-like	N	clot, isoform A	FBgn0000318	cl	CG11024	69.84	4e-60
AAEL014909			0.722821		UNK		conserved secreted precursor	Y	uncharacterized protein CG12811	FBgn0037779	CG12811	CG12811	44.09	2e-20
AAEL004327			0.722009	valyl-tRNA synthetase	RTT	valyl-tRNA synthetase [Source:VB Community Annotation]	valyl-tRNA synthetase	N	Valyl-tRNA synthetase, isoform B	FBgn0027079	ValRS	CG4062	72.28	0
AAEL009305			0.721288	numb-associated kinase	DIV	numb-associated kinase [Source:VB Community Annotation]	numb-associated kinase	N	Numb-associated kinase, isoform C	FBgn0015772	Nak	CG10637	52.92	0
AAEL004710			0.721123	sphingomyelin synthetase	MET	sphingomyelin synthetase [Source:VB Community Annotation]	phosphatidylcholine:ceramide cholinephosphotransferase 1-like isoform X3	N	SMSr	FBgn0052380	SMSr	CG32380	38.18	3e-60
AAEL009311			0.719192	HMG coenzyme A reductase	MET	3-hydroxy-3-methylglutaryl-coenzyme A reductase [Source:VB Community Annotation]	3-hydroxy-3-methylglutaryl-coenzyme A reductase-like	N	HMG coenzyme A reductase	FBgn0263782	Hmgcr	CG10367	60.26	0
AAEL011870			0.718349	rap55	DIV	rap55 [Source:VB Community Annotation]	LSM14 homolog B-like isoform X1	N	trailer hitch, isoform I	FBgn0041775	tral	CG10686	60.71	2e-42
AAEL005495			0.712208	phospholipid-transporting ATPase 1	TRP	phospholipid-transporting ATPase 1 (aminophospholipid flippase 1) [Source:VB Community Annotation]	phospholipid-transporting ATPase ID isoform X1	N	ATPase 8B, isoform I	FBgn0037989	ATP8B	CG14741	64.52	0
AAEL015146			0.709173	ATP-binding cassette sub-family A member 3-like	TRP	ATP-binding cassette sub-family A member 3, putative [Source:VB Community Annotation]	ATP-binding cassette sub-family A member 3-like	N	CG1718, isoform C	FBgn0031170	CG1718	CG1718	39.21	0
AAEL018357			0.705648	Su	RTT		RNA polymerase II elongation factor ELL2-like isoform X1	N	Su(Tpl), isoform A	FBgn0014037	Su(Tpl)	CG32217	52.1	3e-41
AAEL013119			0.703785	charged multivesicular body protein	TRP	charged multivesicular body protein [Source:VB Community Annotation]	charged multivesicular body 1b	N	charged multivesicular body protein 1, isoform A	FBgn0036805	Chmp1	CG4108	82.76	1e-107
AAEL008025			0.703145		UNK		AAEL008025-PA	N	uncharacterized protein CG16787	FBgn0034940	CG16787	CG16787	60	2e-77
AAEL003798			0.702639		UNK		AAEL003798-PA	N
AAEL002886			0.701578	thioredoxin reductase	RSM	thioredoxin reductase [Source:VB Community Annotation]	thioredoxin reductase mitochondrial-like isoform X1	N	thioredoxin reductase-1, isoform C	FBgn0020653	Trxr-1	CG2151	71.14	0
AAEL013335			0.700705		UNK		transmembrane 245 isoform X4	N	CG2698, isoform I	FBgn0037536	CG2698	CG2698	42.39	0
AAEL004986			0.700479	smg-7	RTT	smg-7 (suppressor with morphological effect on genitalia protein 7) [Source:VB Community Annotation]	nonsense-mediated mrna decay	N	Smg5, isoform B	FBgn0019890	Smg5	CG8954	37.51	0
AAEL003817			0.698758	kappa b-ras	DIV	kappa b-ras [Source:VB Community Annotation]	ras family small gtpase	N	kappaB-Ras, isoform A	FBgn0050503	CG30503	CG30503	63.26	8e-95
AAEL006835			0.698501	painless	TRP	transient receptor potential cation channel protein painless [Source:VB Community Annotation]	transient receptor potential cation channel painless	N	painless, isoform A	FBgn0060296	pain	CG15860	34.63	5e-156
AAEL009863			0.697964	I m not dead yet-like	TRP	sodium/dicarboxylate cotransporter, putative [Source:VB Community Annotation]	I m not dead yet-like	N	I'm not dead yet, isoform C	FBgn0036816	Indy	CG3979	56.22	0
AAEL000079			0.697779		UNK		CDNA sequence	N	uncharacterized protein CG31635, isoform B	FBgn0051635	CG31635	CG31635	52.65	3e-72
AAEL007799			0.69696	regulator of chromosome condensation-like	RTT	regulator of chromosome condensation [Source:VB Community Annotation]	regulator of chromosome condensation-like	N	regulator of chromosome condensation 1, isoform C	FBgn0002638	Rcc1	CG10480	42.66	1e-88
AAEL013170			0.694702	phosphatidylcholine-sterol acyltransferase	MET	phosphatidylcholine-sterol acyltransferase (lecithin-cholesterol acyltransferase) [Source:VB Community Annotation]	phosphatidylcholine-sterol acyltransferase	Y	uncharacterized protein CG31683, isoform A	FBgn0051683	CG31683	CG31683	58.16	5e-162
AAEL009265			0.694587	nuclear receptor coactivator 6	RTT		transcription factor iia	N	nuclear receptor coactivator 6, isoform C	FBgn0031698	Ncoa6	CG14023	36.15	2e-23
AAEL002306			0.693966	hect E3 ubiquitin ligase	DIV	hect E3 ubiquitin ligase [Source:VB Community Annotation]	probable E3 ubiquitin- ligase HERC2	N	HECT and RLD domain containing protein 2	FBgn0031107	HERC2	CG11734	62.85	0
AAEL000246			0.690799	GPRSTN	DIV	GPCR Frizzled/Smoothened Family [Source:VB Community Annotation]	protocadherin-like wing polarity stan isoform X1	Y	starry night, isoform D	FBgn0024836	stan	CG11895	67.04	0
AAEL004448			0.690037	torsin A	DIV	torsin a [Source:VB Community Annotation]	torsin isoform X2	Y	torsin, isoform A	FBgn0025615	Torsin	CG3024	41.79	2e-87
AAEL009041			0.687438	actin-related 2/3 complex	CS	arp2/3 complex 20 kd subunit [Source:VB Community Annotation]	actin-related 2 3 complex subunit 4	N	Actin-related protein 2/3 complex, subunit 4	FBgn0284255	Arpc4	CG5972	88.1	1e-107
AAEL012278			0.687094	metalloprotease	PROT	metalloprotease [Source:VB Community Annotation]	presequence mitochondrial	N	CG3107, isoform B	FBgn0033005	CG3107	CG3107	53.21	0
AAEL007848			0.686515	TBC1 domain family member 15-like	DIV		TBC1 domain family member 15-like	N	TBC1 domain family member 15/17, isoform A	FBgn0031233	Tbc1d15-17	CG11490	41.24	1e-156
AAEL011505			0.686506	glycoprotein	DIV	integral membrane pore glycoprotein gp210, putative [Source:VB Community Annotation]	nuclear pore membrane glyco 210-like	Y	glycoprotein 210 kDa, isoform A	FBgn0266580	Gp210	CG7897	44.93	0
AAEL010794			0.685926	prenylated rab acceptor	DIV	prenylated rab acceptor [Source:VB Community Annotation]	prenylated RAB acceptor 1	N	CG1418	FBgn0033468	CG1418	CG1418	46.32	7e-60
AAEL004559			0.68524	synaptosomal associated protein	TRP	synaptosomal associated protein [Source:VB Community Annotation]	snap-25 synaptosome-associated component of snare complex	N	Synaptosomal-associated protein 25kDa, isoform C	FBgn0011288	Snap25	CG40452	89.51	3e-102
AAEL009391			0.685153	misexpression suppressor of ras	DIV	misexpression suppressor of ras, putative [Source:VB Community Annotation]	AAEL009391-PA	N	misexpression suppressor of ras 4, isoform D	FBgn0034240	MESR4	CG4903	45.45	3e-143
AAEL004662			0.685028		UNK		transmembrane 267-like	Y	uncharacterized protein CG10866, isoform A	FBgn0035475	CG10866	CG10866	40.96	3e-34
AAEL001321			0.683434	transcription factor dp	RTT	transcription factor dp [Source:VB Community Annotation]	transcription factor Dp-like isoform X1	N	DP transcription factor, isoform C	FBgn0011763	Dp	CG4654	63.71	3e-104
AAEL006895			0.683059	phosphofructokinase	MET	phosphofructokinase [Source:VB Community Annotation]	ATP-dependent 6-phosphofructokinase isoform X1	N	phosphofructokinase, isoform C	FBgn0003071	Pfk	CG4001	78.47	0
AAEL006880			0.682475	rab32	DIV	rab32 [Source:VB Community Annotation]	ras-related Rab-32 isoform X3	N	Rab32, isoform I	FBgn0002567	Rab32	CG8024	62.21	1e-120
AAEL011562			0.682391	Dronc	APO/IMM	caspase (long) [Source:VB Community Annotation]	caspase-1	N	death regulator Nedd2-like caspase	FBgn0026404	Dronc	CG8091	30.93	3e-64
AAEL011949			0.677751	Tf2	DIV	transferrin [Source:VB Community Annotation]	melanotransferrin-like isoform X2	Y	transferrin 2	FBgn0036299	Tsf2	CG10620	61.33	0
AAEL003812			0.677125	centrocortin	DIV		AAEL003812-PA, partial	N	centrocortin, isoform B	FBgn0032876	Cen	CG1962	40.6	5e-165
AAEL004668			0.676548	septin	DIV	septin [Source:VB Community Annotation]	septin cdc10	N	septin 2, isoform A	FBgn0014029	Sep	CG4173	85.64	0
AAEL018284			0.672319	over compensating males	UNK		PREDICTED: uncharacterized protein LOC109424409 isoform X2	N	over compensating males, isoform A	FBgn0266083	ocm	CG3363	25.97	7e-114
AAEL004475			0.671858	actin-related 2/3 complex	CS	arp2/3 complex 21 kd subunit [Source:VB Community Annotation]	actin-related Arp2 3 complex subunit ARPC3	N	Actin-related protein 2/3 complex, subunit 3A, isoform E	FBgn0038369	Arpc3A	CG4560	78.65	2e-103
AAEL004211			0.67142		UNK		PDZ domain-containing 8	N	uncharacterized protein CG10362	FBgn0030358	CG10362	CG10362	45.98	0
AAEL014730			0.670661	neurobeachin	DIV	neurobeachin [Source:VB Community Annotation]	neurobeachin-like isoform X3	N	rugose, isoform N	FBgn0029746	CG15465	CG15465	80.58	0
AAEL008631			0.6701	ATP-binding cassette transporter	TRP	ABC transporter [Source:VB Community Annotation]	abc transporter	N	uncharacterized protein CG17646, isoform B	FBgn0264494	CG17646	CG17646	49.87	0
AAEL012510			0.669903	IKK2	IMM	IMD pathway signalling I-Kappa-B Kinase 2 (IKK2 IKK-gamma). [Source:VB Community Annotation]	NF-kappa-B essential modulator-like (IKK 2)	N	kenny, isoform A	FBgn0041205	key	CG16910	27.73	1e-31
AAEL007537			0.669348		DIV		brain I3	N	uncharacterized protein CG12012, isoform A	FBgn0035444	CG12012	CG12012	43.54	8e-31
AAEL005321			0.665352	neurexin IV	DIV	neurexin iv [Source:VB Community Annotation]	neurexin-4-like isoform X1	N	neurexin IV, isoform B	FBgn0013997	Nrx-IV	CG6827	72.28	0
AAEL011776			0.664849	snap	TRP	soluble nsf attachment protein (snap) [Source:VB Community Annotation]	soluble NSF attachment	N	alpha soluble NSF attachment protein	FBgn0250791	alphaSnap	CG6625	82.25	0
AAEL001935			0.662116	CTL-like protein	TRP	CTL-like protein 1 [Source:UniProtKB/Swiss-Prot;Acc:Q17JQ7]	choline transporter	N	CG1311, isoform A	FBgn0035523	CG1311	CG1311	59.18	0
AAEL008371			0.661735	neurofibromin	DIV	neurofibromin [Source:VB Community Annotation]	neurofibromin-like isoform X3	N	neurofibromin 1, isoform B	FBgn0015269	Nf1	CG8318	81.49	0
AAEL005337			0.661416	carbonic anhydrase	DIV	carbonic anhydrase [Source:VB Community Annotation]	carbonic anhydrase	N	carbonic anhydrase 2, isoform A	FBgn0027843	CAH2	CG6906	44.88	5e-78
AAEL006958			0.660059	contactin	DIV	cell adhesion molecule [Source:VB Community Annotation]	contactin-like isoform X1	Y	contactin	FBgn0037240	Cont	CG1084	63.46	0
AAEL005998			0.655979	rap1 GTPase-activating 1-like isoform X1	DIV	rap GTPase-activating protein [Source:VB Community Annotation]	rap1 GTPase-activating 1-like isoform X1	N	Rap GTPase activating protein 1, isoform F	FBgn0264895	RapGAP1	CG44086	58.02	0
AAEL013840			0.655096	PDGF- and VEGF-related factor 1	DIV		salivary vascular endothelial growth factor	N	PDGF- and VEGF-related factor 1, isoform C	FBgn0030964	Pvf1	CG7103	34.13	8e-36
AAEL011622			0.653749	serine protease	IMM	serine protease, putative [Source:VB Community Annotation]	serine protease	Y	uncharacterized protein CG11836, isoform I	FBgn0039272	CG11836	CG11836	29.5	4e-29
AAEL008133			0.648616	hflx	DIV	GTP-binding protein hflx [Source:VB Community Annotation]	gtp-binding hflx	N	CG5116, isoform A	FBgn0259991	CG42488	CG42488	53.97	1e-174
AAEL013314			0.647927	calcyclin-binding -like	DIV	calicylin binding protein [Source:VB Community Annotation]	calcyclin-binding -like	N	CG3226	FBgn0029882	CG3226	CG3226	44.05	3e-53
AAEL005231			0.646878	histone gene-specific epigenetic repressor in late S phase	RTT		proteoglycan 4-like	N	histone gene-specific epigenetic repressor in late S phase, isoform H	FBgn0052529	Hers	CG32529	65.93	2e-72
AAEL002597			0.646603	WW domain binding protein	DIV		WW domain-binding 2	N	WW domain binding protein 2, isoform D	FBgn0036318	Wbp2	CG11009	64.35	1e-81
AAEL012579			0.645823	Aspartate aminotransferase	DIV	Aspartate aminotransferase [Source:UniProtKB/TrEMBL;Acc:Q16LN3]	aspartate cytoplasmic-like	N	glutamate oxaloacetate transaminase 1, isoform A	FBgn0001124	Got1	CG8430	67.66	0
AAEL009320			0.644997	Tcp1-like	DIV	chaperonin [Source:VB Community Annotation]	T-complex 1 subunit alpha	N	Tcp1-like, isoform B	FBgn0003676	T-cp1	CG5374	87.97	0
AAEL012935			0.640334	slingshot	DIV	slingshot dual specificity phosphatase [Source:VB Community Annotation]	phosphatase Slingshot-like isoform X1	N	slingshot, isoform D	FBgn0029157	ssh	CG6238	69.3	0
AAEL018215			0.639311	sponge	DIV		dedicator of cytokinesis 3 isoform X1	N	sponge, isoform G	FBgn0264324	spg	CG31048	61.02	0
AAEL007884			0.638713	stambha A	DIV	conserved membrane protein at 44E, putative [Source:VB Community Annotation]	EFR3 homolog cmp44E-like isoform X2	N	stambha A, isoform A	FBgn0086784	stmA	CG8739	70.86	0
AAEL017284			0.635919		UNK		AAEL017284-PA	N
AAEL018126			0.635883	twenty-four	BF		mucin-19-like isoform X1	N	twenty-four, isoform L	FBgn0026083	tyf	CG4857	31.85	2e-26
AAEL008601			0.635828	mRpL28	RSM	39S mitochondrial ribosomal protein L28 [Source:VB Community Annotation]	39S ribosomal mitochondrial	N	mitochondrial ribosomal protein L28, isoform A	FBgn0031660	mRpL28	CG3782	64.31	3e-122
AAEL000054			0.635784	mll	RTT	mixed-lineage leukemia protein, mll [Source:VB Community Annotation]	histone-lysine N-methyltransferase trithorax-like	N	trithorax, isoform A	FBgn0003862	trx	CG8651	46.03	1e-165
AAEL010610			0.632053	serine palmitoyltransferase 1-like	MET	serine palmitoyltransferase i [Source:VB Community Annotation]	serine palmitoyltransferase 1-like	N	serine palmitoyltransferase subunit I, isoform C	FBgn0086532	Spt-I	CG4016	62.15	0
AAEL003550			0.631685	aquaporin	TRP	aquaporin [Source:VB Community Annotation]	aquaporin major intrinsic family	N	prip, isoform A	FBgn0033635	Prip	CG7777	58.78	3e-105
AAEL012099			0.631499	slamdance	PROT	protease m1 zinc metalloprotease [Source:VB Community Annotation]	puromycin-sensitive aminopeptidase	N	slamdance, isoform A	FBgn0285963	sda	CG5518	48.88	0
AAEL000248			0.630663	Dgp-1	DIV	GTP binding protein [Source:VB Community Annotation]	GTP-binding 1	N	Dgp-1, isoform A	FBgn0027836	Dgp-1	CG5729	71.72	0
AAEL000055			0.628569		DIV		glycosylated lysosomal membrane -like	Y
AAEL001397			0.624135	ribonuclease	RTT	ribonuclease [Source:VB Community Annotation]	DIS3-like exonuclease 2	N	uncharacterized protein CG16940, isoform A	FBgn0035111	CG16940	CG16940	40.27	1e-166
AAEL007725			0.622904	reticulocalbin	DIV	reticulocalbin [Source:VB Community Annotation]	reticulocalbin calumenin dna supercoiling factor	Y	supercoiling factor, isoform A	FBgn0025682	scf	CG9148	60.06	1e-140
AAEL001206			0.622378	threonyl-trna synthetase	RTT	threonyl-tRNA synthetase [Source:VB Community Annotation]	threonyl-trna synthetase	N	Threonyl-tRNA synthetase, isoform C	FBgn0027081	ThrRS	CG5353	80.84	0
AAEL003283			0.621892	bitesize	DIV	bitesize isoform [Source:VB Community Annotation]	ca2+-dependent phospholipid-binding	N	bitesize, isoform F	FBgn0266756	btsz	CG44012	68.11	0
AAEL010484			0.621719	vacuolar sorting-associated	DIV	vacuolar protein sorting-associated protein (vps13) [Source:VB Community Annotation]	vacuolar sorting-associated	N	vacuolar protein sorting 13B, isoform A	FBgn0039727	Vps13B	CG15523	33.44	0
AAEL007485			0.620161	sodium-dependent phosphate transporter	TRP	sodium-dependent phosphate transporter [Source:VB Community Annotation]	sodium-dependent phosphate transporter	N	major facilitator superfamily transporter 17, isoform H	FBgn0058263	MFS17	CG40263	63.8	0
AAEL014329			0.617426	Tousled-like kinase	DIV	mixed lineage protein kinase [Source:VB Community Annotation]	serine threonine- kinase tousled-like 2	N	Tousled-like kinase, isoform N	FBgn0283657	Tlk	CG34412	85.94	0
AAEL001715			0.616322	chaperonin	DIV	chaperonin [Source:VB Community Annotation]	T-complex 1 subunit epsilon	N	T-complex chaperonin 5, isoform A	FBgn0010621	Cct5	CG8439	84.7	0
AAEL003417			0.614835	mitochondrial ATPase inhibitor	RSM	mitochondrial ATPase inhibitor, putative [Source:VB Community Annotation]	ATPase inhibitor mai- mitochondrial-like	N	uncharacterized protein CG34423, isoform B	FBgn0085452	CG34423	CG34423	62.64	3e-23
AAEL013980			0.611168	glutaredoxin	RSM	glutaredoxin, putative [Source:VB Community Annotation]	glutaredoxin 2	N	CG6852, isoform A	FBgn0036820	CG6852	CG6852	68.04	2e-42
AAEL017136			0.609535	CYP325V1	RSM	cytochrome P450 [Source:VB Community Annotation]	cytochrome P450	N	Cyp313a1	FBgn0038236	Cyp313a1	CG3360	30.68	9e-67
AAEL013147			0.609402	dystroglycan	UNK		AAEL013147-PA	N	dystroglycan, isoform B	FBgn0034072	Dg	CG18250	53.9	0
AAEL013353			0.607731	profilin	CS	Profilin [Source:UniProtKB/TrEMBL;Acc:Q16JE9]	profilin isoform X1	N	chickadee, isoform D	FBgn0000308	chic	CG9553	83.33	4e-76
AAEL010308			0.60703		UNK		isoform A	N	uncharacterized protein CG42671, isoform J	FBgn0261553	CG42671	CG42671	32.61	4e-62
AAEL007558			0.606769	helicase	RTT	helicase [Source:VB Community Annotation]	chromo domain 1	N	Etl1	FBgn0032157	Etl1	CG5899	48.28	0
AAEL003780			0.605941		UNK		AAEL003780-PA	N
AAEL003385			0.6056		UNK		zinc finger 622-like	N	CG6769, isoform A	FBgn0030878	CG6769	CG6769	55.45	9e-156
AAEL001385			0.604484		DIV		IST1 homolog isoform X2	N	uncharacterized protein CG10103, isoform A	FBgn0035715	CG10103	CG10103	57.7	2e-145
AAEL007589			0.602647	Dedicator of cytokinesis protein 2	DIV	Dedicator of cytokinesis protein 2 [Source:VB Community Annotation]	dedicator of cytokinesis 1-like isoform X1	N	myoblast city, isoform A	FBgn0015513	mbc	CG10379	54.9	0
AAEL008862			0.601409		DIV		zn2+-dependent endopeptidase insulinase superfamily	N	CG3107, isoform B	FBgn0033005	CG3107	CG3107	30.26	3e-17
AAEL003336			0.598667	RtcB-like	RTT	tRNA-splicing ligase RtcB homolog [Source:UniProtKB/Swiss-Prot;Acc:Q17FP1]	RTCB_AEDAE ame: Full=tRNA-splicing ligase homolog	N	RtcB-like	FBgn0032781	RtcB	CG9987	86.96	0
AAEL008936			0.597404		UNK		AAEL008936-PA	Y	CG3588, isoform E	FBgn0025643	CG3588	CG3588	33.52	1e-09
AAEL009051			0.59738	TPX5	RSM	Thioredoxin Peroxidase. [Source:VB Community Annotation]	peroxiredoxin posttranslational modification	N	peroxiredoxin 6005	FBgn0031479	Prx6005	CG3083	70.28	1e-111
AAEL013050			0.596699	Wnk kinase	RTT		AF4 FMR2 family member 4	N	Wnk kinase, isoform O	FBgn0037098	Wnk	CG7177	50.85	9e-29
AAEL014059			0.595507	unextended	TRP	ancient conserved domain protein 2 (cyclin m2) [Source:VB Community Annotation]	metal transporter	N	unextended, isoform H	FBgn0262124	uex	CG42595	65.75	0
AAEL015595			0.595448	annexin B9	DIV		Anopheles gambiae PEST AGAP012930-PA	N	annexin B9, isoform D	FBgn0000083	AnxB9	CG5730	66.67	9e-52
AAEL012426			0.594959	cytochrome c oxidase assembly COX15	RSM	cytochrome c oxidase assembly protein cox15 [Source:VB Community Annotation]	cytochrome c oxidase assembly COX15	N	CG3803	FBgn0034938	CG3803	CG3803	61.62	9e-162
AAEL004802			0.594291	lethal (2) giant discs 1	RTT		coiled-coil and C2 domain-containing 1-like isoform X1	N	lethal (2) giant discs 1, isoform B	FBgn0261983	l(2)gd1	CG4713	50.34	0
AAEL009483			0.593708		UNK		conserved plasma membrane	N	CG1572, isoform B	FBgn0030309	CG1572	CG1572	60.84	1e-48
AAEL009708			0.592514	thioredoxin M	RSM	thioredoxin M, putative [Source:VB Community Annotation]	thioredoxin mitochondrial isoform x3	N	CG3719	FBgn0024986	CG3719	CG3719	75.65	7e-58
AAEL003614			0.592478	CLIPB40	IMM	Clip-Domain Serine Protease family B. [Source:VB Community Annotation]	serine protease easter-like	Y	CG9737	FBgn0039758	CG9737	CG9737	36.75	3e-86
AAEL009721			0.590239	paraplegin	DIV	paraplegin [Source:VB Community Annotation]	aaa+-type atpase	N	CG2658, isoform C	FBgn0024992	CG2658	CG2658	76.89	0
AAEL008864			0.587043		DIV		dnaJ homolog subfamily C member 11-like	N	CG8531	FBgn0033918	CG8531	CG8531	55.7	0
AAEL010676			0.586708	regulator of g protein signaling	DIV	regulator of g protein signaling [Source:VB Community Annotation]	regulator of G- signaling 7-like isoform X1	N	regulator of G-protein signalling 7, isoform A	FBgn0024941	RSG7	CG9108	75.75	0
AAEL000049			0.586363	three prime repair exonuclease 1	DIV	three prime repair exonuclease 1, putative [Source:VB Community Annotation]	three prime repair exonuclease 1	N	CG3165, isoform A	FBgn0031484	CG3165	CG3165	31.95	8e-35
AAEL005801			0.585463	bifunctional aminoacyl-tRNA synthetase	RTT	bifunctional aminoacyl-tRNA synthetase [Source:VB Community Annotation]	bifunctional aminoacyl-tRNA synthetase	N	Glutamyl-prolyl-tRNA synthetase, isoform A	FBgn0005674	GluProRS	CG5394	68.62	0
AAEL013778			0.584153	F-actin capping protein alpha	CS	F-actin capping protein alpha [Source:VB Community Annotation]	F-actin-capping subunit alpha	N	capping protein alpha	FBgn0034577	cpa	CG10540	73.05	3e-158
AAEL009877			0.582614	Amyloid binding protein	TRP	amyloid binding protein [Source:VB Community Annotation]	kinesin light chain	N	protein interacting with APP tail-1, isoform B	FBgn0029878	Pat1	CG10695	58.66	9e-157
AAEL006415			0.582004	leucyl tRNA synthetase	RTT	leucyl-tRNA synthetase [Source:VB Community Annotation]	leucine--tRNA cytoplasmic-like	N	Leucyl-tRNA synthetase, isoform A	FBgn0284253	LeuRS	CG33123	70.22	0
AAEL004905			0.580754	monocarboxylate transporter	TRP	monocarboxylate transporter [Source:VB Community Annotation]	monocarboxylate transporter	N	CG3409, isoform A	FBgn0033095	CG3409	CG3409	47	1e-172
AAEL006129			0.579632	deoxyhypusine hydroxylase	PROT	Deoxyhypusine hydroxylase [Source:UniProtKB/TrEMBL;Acc:Q177G8]	deoxyhypusine hydroxylase	N	nero	FBgn0261479	nero	CG2245	72.48	2e-154
AAEL003430			0.579401		CS		regulator of microtubule dynamics 1	N
AAEL001569			0.579363	cysteine string protein	DIV		cysteine string	N	cysteine string protein, isoform A	FBgn0004179	Csp	CG6395	74.42	2e-71
AAEL007322			0.578321	wunen	DIV	phosphatidate phosphatase [Source:VB Community Annotation]	phosphatidate phosphatase	N	wunen, isoform B	FBgn0016078	wun	CG8804	61.62	3e-126
AAEL018327			0.578048	milton	DIV		trafficking kinesin-binding milt isoform X1	N	milton, isoform A	FBgn0262872	milt	CG43227	55.57	0
AAEL003858			0.573286	mitochondrial precursor	RSM	UPF0466 protein AAEL003858, mitochondrial Precursor [Source:VB Community Annotation]	essential MCU mitochondrial	N	uncharacterized protein CG17680		CG17680	CG17680	61.9	3e-21
AAEL001218			0.571034	Aats-ala	RTT	alanyl-tRNA synthetase [Source:VB Community Annotation]	alanyl-tRNA synthetase	N	Alanyl-tRNA synthetase, isoform B	FBgn0027094	AlaRS	CG13391	77.99	0
AAEL003883			0.57018	Rho GTPase activating protein	DIV		PREDICTED: uncharacterized protein LOC109422056	N	Rho GTPase activating protein at 15B, isoform B	FBgn0030808	RhoGAP15B	CG4937	40.81	0
AAEL008777			0.569896	Abl tyrosine kinase	DIV	proto-oncogene tyrosine-protein kinase abl1 [Source:VB Community Annotation]	tyrosine- kinase Abl-like isoform X1	N	Abl tyrosine kinase, isoform H	FBgn0000017	Abl	CG4032	67.99	0
AAEL007609			0.565846	Histone H2A	RTT	Histone H2A [Source:UniProtKB/TrEMBL;Acc:Q171J5]	histone	N	histone H2A variant, isoform A	FBgn0001197	His2Av	CG5499	98.36	4e-80
AAEL001336			0.565431	vacuolar protein sorting 2	DIV	charged multivesicular body protein 2a [Source:VB Community Annotation]	charged multivesicular body 2a	N	vacuolar protein sorting 2	FBgn0039402	Vps2	CG14542	76.56	1e-111
AAEL009043			0.562212		DIV		bicaudal D-related homolog isoform X1	N	uncharacterized protein CG32137, isoform B	FBgn0052137	CG32137	CG32137	51.98	4e-156
AAEL008657			0.562002	midline fasciclin	DIV	midline fasciclin [Source:VB Community Annotation]	transforming growth factor-beta-induced ig-h3-like isoform X2	N	midline fasciclin, isoform Q	FBgn0260745	mfas	CG3359	51.26	0
AAEL007403			0.561484		UNK		AAEL007403-PA	N
AAEL002963			0.560878		UNK		uncharacterized membrane DDB_G0293934-like isoform X1	N	uncharacterized protein CG11791, isoform B	FBgn0039266	CG11791	CG11791	59.15	1e-21
AAEL001930			0.560547	pra1	TRP	pra1 protein [Source:VB Community Annotation]	PRA1 family 3-like	N	Jwa	FBgn0032704	Jwa	CG10373	48.4	6e-47
AAEL006879			0.560399	folate carrier protein	TRP	folate carrier protein [Source:VB Community Annotation]	mitochondrial folate transporter carrier	N	CG8026, isoform B	FBgn0266486	CG45085	CG45085	77.59	3e-172
AAEL013395			0.555814	0	DIV		transforming growth factor-beta-induced ig-h3-like isoform X1	Y
AAEL003453			0.553657	failed axon connections	MET	failed axon connections protein, putative [Source:VB Community Annotation]	failed axon connections fax glutathione s-transferase	N	failed axon connections, isoform D	FBgn0014163	fax	CG4609	70.11	3e-142
AAEL001467			0.552993	sidekick	DIV	sdk-P1 [Source:VB Community Annotation]	sidekick-like isoform X3	N	sidekick, isoform H	FBgn0021764	sdk	CG5227	74.1	0
AAEL018213			0.54666	son of sevenless	DIV		ras-specific guanine nucleotide-releasing factor 2-like	N	Son of sevenless	FBgn0001965	Sos	CG7793	31.82	5e-46
AAEL014111			0.545254	tubulin-specific chaperone	DIV	tubulin-specific chaperone, putative [Source:VB Community Annotation]	tubulin-specific chaperone	N	Tubulin-specific chaperone E, isoform B	FBgn0033055	Tbce	CG7861	40.9	4e-97
AAEL002118			0.544107	ubiquitin-conjugating enzyme rad6	DIV	ubiquitin-conjugating enzyme rad6 [Source:VB Community Annotation]	ubiquitin-conjugating enzyme E2-17 kDa isoform X2	N	ubiquitin conjugating enzyme 6, isoform A	FBgn0004436	Ubc6	CG2013	98.68	6e-110
AAEL005218			0.543805	sinuous	DIV		TPA_exp: septate junction sinuous	N	sinuous	FBgn0010894	sinu	CG10624	73.61	1e-120
AAEL008953			0.539422	Kayak	IMM/APO		transcription factor kayak-like isoform X3	N	kayak, isoform F	FBgn0001297	kay	CG33956	38.08	6e-30
AAEL004379			0.537556	phosphatidyl inositol 4 kinase	TRP	phosphatidylinositol 4-kinase type-ii [Source:VB Community Annotation]	phosphatidylinositol 4-kinase	N	Pi4KIIalpha, isoform C	FBgn0037339	Pi4KIIalpha	CG2929	64.05	0
AAEL006275			0.536971		UNK		isoform A	Y	uncharacterized protein CG18870, isoform A	FBgn0042180	CG18870	CG18870	30.43	4e-23
AAEL012939			0.534701	methylmalonyl-CoA decarboxylase	DIV	gamma-subunit,methylmalonyl-CoA decarboxylase, putative [Source:VB Community Annotation]	coiled-coil-helix-coiled-coil-helix domain-containing mitochondrial-like	N	CG5010, isoform A		CG5010	CG5010	53.49	4e-41
AAEL017058			0.533379		RTT		chromodomain helicase DNA binding	N
AAEL011272			0.532587	N-methyl-D-aspartate receptor-associated protein	DIV	nmda receptor glutamate-binding chain [Source:VB Community Annotation]	lifeguard 1-like isoform X1	N	N-methyl-D-aspartate receptor-associated protein, isoform F	FBgn0013305	Nmda1	CG3798	67.22	8e-115
AAEL014347			0.531787		DIV		multiple epidermal growth factor-like domains 8	N	CG7466, isoform B	FBgn0031981	CG7466	CG7466	53.03	0
AAEL011274			0.529785	fab1 kinase	DIV	1-phosphatidylinositol-4-phosphate 5-kinase, putative [Source:VB Community Annotation]	phosphatidylinositol-4-phosphate 5-	N	fab1 kinase, isoform B	FBgn0250851	CG33981	CG33981	45.59	0
AAEL007258			0.528151		RTT		general transcription factor 3C polypeptide 2-like isoform X2	N	uncharacterized protein CG42588, isoform B	FBgn0260965	CG42588	CG42588	24.16	2e-36
AAEL014847			0.526769	inx2	TRP	Innexin [Source:UniProtKB/TrEMBL;Acc:Q16FA2]	innexin inx2	N	innexin 2, isoform B	FBgn0027108	Inx2	CG4590	81.79	0
AAEL009857			0.524599	Start1	MET		related lipid transfer domain containing	N	Start1, isoform A	FBgn0035028	Start1	CG3522	47.91	8e-175
AAEL004873			0.521699	Gamma-interferon-inducible lysosomal thiol reductase 1	IMM		gamma-interferon inducible lysosomal thiol reductase	Y	Gamma-interferon-inducible lysosomal thiol reductase 1	FBgn0038149	GILT1	CG9796	46.12	5e-75
AAEL013290			0.520756		UNK		transmembrane 192-like isoform X2	N	CG7523	FBgn0038533	CG7523	CG7523	56.11	1e-67
AAEL007597			0.520554	CLIPC3	IMM	Clip-Domain Serine Protease family C [Source:VB Community Annotation]	serine protease	Y	snake, isoform A	FBgn0003450	snk	CG7996	38.3	3e-75
AAEL014378			0.5178		TRP		intracellular transport USO1-like	N
AAEL002392			0.517625		UNK		AAEL002392-PA	N	uncharacterized protein CG13917, isoform A	FBgn0035237	CG13917	CG13917	37.09	0
AAEL003754			0.517093	actin binding	CS	actin binding [Source:VB Community Annotation]	actin binding	N	alpha catenin, isoform A	FBgn0010215	alpha-Cat	CG17947	91	0
AAEL012440			0.516075	sodium-bile acid cotransporter	TRP	sodium-bile acid cotransporter [Source:VB Community Annotation]	ileal sodium bile acid cotransporter-like	Y	uncharacterized protein CG11655	FBgn0030638	CG11655	CG11655	47.6	3e-114
AAEL017329			0.51514	meiotic P26	DIV		brain tumor -like	N	meiotic P26, isoform E	FBgn0026206	mei-P26	CG12218	62.86	7e-179
AAEL004074			0.515016	ben	UNK		conserved plasma membrane	N	ben, isoform C	FBgn0052594	be	CG32594	27.03	5e-43
AAEL001381			0.514913	sphingomyelin synthetase	MET	sphingomyelin synthetase [Source:VB Community Annotation]	sphingomyelin synthetase	N	SMSr	FBgn0052380	SMSr	CG32380	52.06	0
AAEL002178			0.51364		DIV		methenyltetrahydrofolate synthase domain-containing	N	lost	FBgn0263594	lost	CG14648	43.25	1e-100
AAEL018280			0.512333	Blastoderm-specific gene	DIV		blastoderm-specific 25D-like isoform X1	N	Blastoderm-specific gene 25D, isoform C	FBgn0000228	Bsg25D	CG14025	36.14	6e-146
AAEL007702			0.508381	chaperonin	DIV	chaperonin [Source:VB Community Annotation]	T-complex 1 subunit delta	N	CG5525		CG5525	CG5525	85.34	0
AAEL007927			0.5082		UNK		AAEL007927-PA	N
AAEL007375			0.502062	pyruvate dehydrogenase	MET	pyruvate dehydrogenase [Source:VB Community Annotation]	pyruvate dehydrogenase (acetyl-transferring) mitochondrial isoform X1	N	pyruvate dehydrogenase kinase, isoform A	FBgn0017558	Pdk	CG8808	73.84	0
AAEL001872			0.501981	porin	TRP	voltage-dependent anion-selective channel [Source:VB Community Annotation]	voltage-dependent anion-selective channel	N	porin, isoform B	FBgn0004363	porin	CG6647	73.05	2e-158
AAEL002230			0.501258	kismet	RTT	chromodomain helicase DNA binding protein [Source:VB Community Annotation]	chromodomain helicase DNA binding	N	kismet, isoform A	FBgn0266557	kis	CG3696	50.49	0
AAEL018120			0.49899	Ribosomal protein S6 kinase	DIV	Ribosomal protein S6 kinase [Source:UniProtKB/TrEMBL;Acc:Q17ND6]	ribosomal S6 kinase beta-2 isoform X1	N	ribosomal protein S6 kinase, isoform A	FBgn0283472	S6k	CG10539	77.26	0
AAEL015041			0.498387	mitochondrial carrier	TRP	mitochondrial carrier [Source:VB Community Annotation]	mitochondrial carrier	N	mitochondrial carrier homolog 1, isoform C	FBgn0027786	Mtch	CG6851	48.93	4e-112
AAEL011527			0.498278	eukaryotic translation initiation factor	RTT	eukaryotic translation initiation factor [Source:VB Community Annotation]	eukaryotic translation initiation factor	N	eukaryotic initiation factor 2beta	FBgn0004926	eIF-2beta	CG4153	68.32	5e-126
AAEL002155			0.498048	Rab10	DIV	ras-related protein Rab-10, putative [Source:VB Community Annotation]	ras-related Rab-10	N	Rab10	FBgn0015789	Rab10	CG17060	87.75	4e-132
AAEL014931			0.497253	ect4	IMM	sarm1 [Source:VB Community Annotation]	sarm with sterile alpha and armadillo	N	Ectoderm-expressed 4, isoform K	FBgn0262579	Ect4	CG43119	70.01	0
AAEL000191			0.494785		UNK		AAEL000191-PA	N	uncharacterized protein CG17841	FBgn0028480	CG17841	CG17841	48.66	5e-118
AAEL006474			0.494463	Lon protease	PROT	ATP-dependent Lon protease, putative [Source:VB Community Annotation]	atp-dependent protease la	N	Lon protease, isoform A	FBgn0036892	Lon	CG8798	67.39	0
AAEL010743			0.492735	cysteine desulfurylase	DIV	cysteine desulfurylase [Source:VB Community Annotation]	probable cysteine mitochondrial	N	uncharacterized protein CG12264	FBgn0032393	CG12264	CG12264	79.3	0
AAEL012393			0.492596		UNK		conserved secreted precursor	N	CG8516	FBgn0037757	CG8516	CG8516	39.67	8e-130
AAEL014226			0.490345	papilllote	UNK		AAEL014226-PA	Y	papillote, isoform B	FBgn0250871	pot	CG2467	52.43	0
AAEL004071			0.489626	nitrogen fixation protein nifu	DIV	nitrogen fixation protein nifu [Source:VB Community Annotation]	iron binding involved in fe-s cluster formation	N	Iron-sulfur cluster assembly enzyme	FBgn0037637	IscU	CG9836	82.55	2e-86
AAEL011606			0.487681	Pmi	RSM		transmembrane 11 mitochondrial-like isoform X1	N	Pmi, isoform C	FBgn0260458	PGRP-LD	CG33717	60.98	6e-70
AAEL001163			0.485725	TEP23	DIV/IMM	macroglobulin/complement [Source:VB Community Annotation]	CD109 antigen-like	Y	Thioester-containing protein 2, isoform F	FBgn0041182	Tep2	CG7052	29.69	0
AAEL011564			0.485661	choline-phosphate cytidylyltransferase	MET	choline-phosphate cytidylyltransferase a, b [Source:VB Community Annotation]	choline-phosphate cytidylyltransferase B-like isoform X1	N	CTP:phosphocholine cytidylyltransferase 1, isoform D	FBgn0003676	Cct1	CG1049	72.57	3e-152
AAEL013490			-0.486703	Zinc/iron regulated transporter-related protein 48C	TRP		zinc transporter ZIP11	N	Zinc/iron regulated transporter-related protein 48C	FBgn0033665	Zip48C	CG13189	69.94	7e-161
AAEL004567			-0.487908	fermitin	DIV	fermitin, putative [Source:VB Community Annotation]	unc-112-related -like	N	fermitin 1, isoform A	FBgn0035498	Fit1	CG14991	71.45	0
AAEL000794			-0.488268	clueless	RTT	clustered mitochondrial protein [Source:VB Community Annotation]	eukaryotic translation initiation factor 3 subunit	N	clueless, isoform A	FBgn0034087	clu	CG8443	65.43	0
AAEL009859			-0.490088	Nucleolar GTP-binding protein 1	DIV	Nucleolar GTP-binding protein 1 [Source:UniProtKB/TrEMBL;Acc:Q16UL5]	nucleolar GTP-binding 1-like	N	novel nucleolar protein 1, isoform A	FBgn0028473	Non1	CG8801	75.88	0
AAEL005734			-0.492581	leucine-rich transmembrane	IMM	leucine-rich transmembrane protein [Source:VB Community Annotation]	AAEL005734-PA, partial	N	uncharacterized protein CG16974, isoform A	FBgn0032479	CG16974	CG16974	47.22	0
AAEL005014			-0.493175	transient receptor potential cation channel gamma	TRP	transient receptor potential channel [Source:VB Community Annotation]	transient receptor potential-gamma	N	transient receptor potential cation channel gamma, isoform B	FBgn0032593	Trpgamma	CG5996	69.26	0
AAEL013133			-0.493716		UNK		AAEL013133-PA, partial	N
AAEL001411			-0.494748	myosin heavy chain	CS	myosin heavy chain, nonmuscle or smooth muscle [Source:VB Community Annotation]	myosin heavy chain	N	zipper, isoform F	FBgn0265434	zip	CG15792	86.23	0
AAEL005221			-0.496384	internalin A	IMM	internalin A, putative [Source:VB Community Annotation]	leucine-rich repeat-containing 58-like isoform X2	N	uncharacterized protein CG32687, isoform A	FBgn0052687	CG32687	CG32687	58.59	7e-88
AAEL002587			-0.497367	Odorant Binding Protein11	BF	odorant binding protein OBP11 [Source:VB Community Annotation]	odorant-binding 56e	Y	Odorant-binding protein 56d, isoform A	FBgn0034470	Obp56d	CG11218	34.69	3e-14
AAEL009492			-0.497569		UNK		CKLF-like MARVEL transmembrane domain-containing 4	N	uncharacterized protein CG15211, isoform A	FBgn0030234	CG15211	CG15211	58.47	9e-36
AAEL009852			-0.500093		UNK		salivary secreted peptide	Y
AAEL010313			-0.500133	sex peptide receptor	DIV		sex peptide receptor	N	Sex peptide receptor, isoform A	FBgn0029768	SPR	CG16752	64.73	3e-90
AAEL015006			-0.502126	RpL23	RTT	60S ribosomal protein L23 (L17A)(AeRpL17A) [Source:VB Community Annotation]	60S ribosomal L23	N	ribosomal protein L23	FBgn0010078	RpL23	CG3661	97.14	3e-95
AAEL002860			-0.504492	mitochondrial pyruvate carrier 1	RSM	Mitochondrial pyruvate carrier [Source:UniProtKB/TrEMBL;Acc:Q17GV8]	mitochondrial pyruvate carrier 1	N	mitochondrial pyruvate carrier, isoform B	FBgn0038662	Mpc1	CG14290	67.62	8e-47
AAEL001128			-0.50554	pudgy	DIV	AMP dependent coa ligase [Source:VB Community Annotation]	probable 4-coumarate-- ligase 1	N	pudgy, isoform A	FBgn0027601	pdgy	CG9009	43.35	7e-83
AAEL010538			-0.506061	translocation protein 1	DIV		membrane component of er translocation complex	N	translocation protein 1, isoform A	FBgn0011584	Trp1	CG4758	60.55	8e-115
AAEL002853			-0.506457	slower border cells	UNK	ccaat/enhancer binding protein [Source:VB Community Annotation]	CCAAT enhancer-binding	N	slow border cells, isoform A	FBgn0005638	slbo	CG4354	47.81	2e-99
AAEL010965			-0.508272	cubulin	DIV	cubulin [Source:VB Community Annotation]	cubilin homolog	N	cubilin	FBgn0052702	Cubn	CG32702	35.38	0
AAEL011810			-0.50842		UNK		AAEL011810-PA	N	uncharacterized protein CG10877	FBgn0038804	CG10877	CG10877	65.52	6e-16
AAEL009387			-0.508613	hexokinase	DIV	hexokinase [Source:VB Community Annotation]	hexokinase type 2-like isoform X1	N	hexokinase A, isoform B	FBgn0001186	Hex-A	CG3001	76.64	0
AAEL009810			-0.508915	sideroflexin	TRP	sideroflexin 1,2,3 [Source:VB Community Annotation]	mitochondrial sideroflexin tricarboxylate transporter	N	CG6812	FBgn0036843	CG6812	CG6812	62.11	2e-140
AAEL014367			-0.511792	corin	BF		mucin-12-like isoform X1	N	corin, isoform B	FBgn0033192	Corin	CG2105	25.1	5e-40
AAEL012614			-0.512852	isocitrate dehydrogenase	RSM	NADP-specific isocitrate dehydrogenase [Source:VB Community Annotation]	isocitrate dehydrogenase [NADP] mitochondrial-like	N	isocitrate dehydrogenase, isoform C	FBgn0001248	Idh	CG7176	61.69	1e-137
AAEL003039			-0.513501	Nonsense-mediated mRNA 3	TRP	nonsense-mediated mRNA decay protein [Source:VB Community Annotation]	60S ribosomal export NMD3-like	N	Nonsense-mediated mRNA 3	FBgn0023542	Nmd3	CG3460	63.12	0
AAEL003604			-0.515182	javelin-like	RTT		homeotic female sterile-like	N	javelin-like, isoform F	FBgn0263929	jvl	CG43162	37.04	2e-112
AAEL007316			-0.524121	hillarin	DIV		hillarin isoform X1	N	hillarin, isoform B	FBgn0050147	Hil	CG30147	84.26	0
AAEL001767			-0.526654		UNK		signal anchor-containing conserved peptide	N	uncharacterized protein CG42336, isoform B	FBgn0259238	CG42336	CG42336	51.16	9e-09
AAEL001169			-0.527098	BOP1	RTT	Ribosome biogenesis protein BOP1 homolog [Source:UniProtKB/Swiss-Prot;Acc:Q17LZ2]	ribosome bio sis bop1	N	CG5033	FBgn0028744	CG5033	CG5033	71.16	0
AAEL013214			-0.527506	c-GMP dependent kinase	DIV	cgmp-dependent protein kinase [Source:VB Community Annotation]	c-GMP dependent kinase	N	CG4839, isoform B	FBgn0032187	CG4839	CG4839	53.9	0
AAEL011184			-0.528322	mitochondrial phosphate carrier	RSM	mitochondrial phosphate carrier protein [Source:VB Community Annotation]	mitochondrial phosphate carrier	N	mitochondrial phosphate carrier protein, isoform B	FBgn0026409	Mpcp	CG4994	77.25	0
AAEL014637			-0.53067	inositol 1,4,5-trisphosphate receptor-like	DIV	inositol 1,4,5-trisphosphate receptor [Source:VB Community Annotation]	inositol 1,4,5-trisphosphate receptor-like	N	inositol 1,4,5,-tris-phosphate receptor, isoform B	FBgn0010051	Itp-r83A	CG1063	71.62	0
AAEL005292			-0.531831	stretch regulated skeletal muscle	DIV	stretch regulated skeletal muscle protein, putative [Source:VB Community Annotation]	Up-regulated during skeletal muscle growth 5	N	Neb-cGP, isoform A	FBgn0083167	Neb-cGP	CG15304	71.43	5e-13
AAEL001269			-0.533456	AE	TRP	Anion exchange protein (Fragment) [Source:UniProtKB/TrEMBL;Acc:Q17LT4]	band 3 anion transport isoform X1	N	CG8177, isoform H	FBgn0036043	CG8177	CG8177	61.18	0
AAEL001746			-0.536039	juvenile hormone resistance protein	DIV	juvenile hormone resistance protein [Source:VB Community Annotation]	methoprene-tolerant mutant	N	germ cell-expressed bHLH-PAS, isoform C	FBgn0261703	gce	CG42739	60.14	4e-175
AAEL001627			-0.538642	mummy	MET	udp-n-acteylglucosamine pyrophosphorylase [Source:VB Community Annotation]	UDP-N-acetylglucosamine pyrophosphorylase	N	mummy, isoform B	FBgn0259749	mmy	CG9535	66.1	0
AAEL013460			-0.540206	ecotropic viral integration site	DIV	ecotropic viral integration site [Source:VB Community Annotation]	ecotropic viral integration site 5 ortholog isoform X1	N	ecotropic viral integration site 5, isoform D	FBgn0262740	Evi5	CG11727	80.65	0
AAEL005997			-0.54696	allergen	MET	allergen, putative [Source:VB Community Annotation]	probable fatty acid-binding	N	fatty acid binding protein, isoform B	FBgn0037913	fabp	CG6783	69.23	2e-53
AAEL008494			-0.547829	mitochondrial carrier protein	TRP	mitochondrial carrier protein ymc [Source:VB Community Annotation]	mitochondrial basic amino acids transporter-like isoform X1	N	CG4995, isoform C	FBgn0032219	CG4995	CG4995	55.78	2e-113
AAEL007473			-0.548474	CYP6AH1	RSM	cytochrome P450 [Source:VB Community Annotation]	probable cytochrome P450 308a1	N	Cyp308a1	FBgn0030949	Cyp308a1	CG6585	36.67	7e-105
AAEL012819			-0.549832	vATPase synthase sunbunit g	DIV	vacuolar ATP synthase subunit g [Source:VB Community Annotation]	vacuolar ATP synthase subunit g	N	vacuolar H[+] ATPase 13kD subunit, isoform A	FBgn0283536	Vha13	CG6213	72.81	2e-53
AAEL000533			-0.550409	CTL16	IMM	C-Type Lectin (CTL16) [Source:VB Community Annotation]	salivary C type lectin	Y	triforce, isoform C	FBgn0035199	tfc	CG9134	35	2e-17
AAEL014753			-0.550447	mitochondrial coenzyme a transporter	TRP	mitochondrial solute carrier protein, putative [Source:VB Community Annotation]	mitochondrial coenzyme a transporter	N	alternative testis transcripts open reading frame A, isoform C	FBgn0067783	att-ORFA	CG4241	65.7	2e-154
AAEL007296			-0.550484	fatty acyl-coA reductase	MET	Fatty acyl-CoA reductase [Source:UniProtKB/TrEMBL;Acc:Q172R4]	fatty acyl- reductase CG8306	N	CG8306	FBgn0034142	CG8306	CG8306	56.78	0
AAEL013005			-0.551899	seele	DIV		ER with RDEL retention signal	Y	seele	FBgn0263260	sel	CG12918	50.26	5e-60
AAEL000726			-0.559016	fibrinoge-related	IMM	fibrinogen and fibronectin [Source:VB Community Annotation]	fibrinogen A	Y	uncharacterized protein CG10359, isoform G	FBgn0035452	CG10359	CG10359	31.33	8e-32
AAEL006113			-0.562683	cystinosin	TRP	cystinosin [Source:VB Community Annotation]	cystinosin homolog isoform X3	Y	uncharacterized protein CG17119, isoform C	FBgn0039045	CG17119	CG17119	50.41	3e-126
AAEL003154			-0.563357	aldo-keto reductase	MET	aldo-keto reductase [Source:VB Community Annotation]	aldo-keto reductase	N	CG2767	FBgn0037537	CG2767	CG2767	59.62	5e-137
AAEL011061			-0.564278	guanine nucleotide exchange factor	DIV		guanine nucleotide exchange factor	N	Rho guanine nucleotide exchange factor 2, isoform H	FBgn0023172	RhoGEF2	CG9635	39.58	1e-34
AAEL012135			-0.568885	GALE2	DIV	Galectin [Source:UniProtKB/TrEMBL;Acc:Q16MZ7]	isoform A	N	CG5335	FBgn0034365	CG5335	CG5335	46.89	1e-93
AAEL012616			-0.570987	NADP transhydrogenase	RSM	NADP transhydrogenase [Source:VB Community Annotation]	NAD(P) mitochondrial-like	N
AAEL014450			-0.573173	peptidyl-glycine alpha-amidating monooxygenase	MET	peptidyl-glycine alpha-amidating monooxygenase [Source:VB Community Annotation]	peptidyl-alpha-hydroxyglycine alpha-amidating lyase 2-like	Y	Peptidyl-alpha-hydroxyglycine-alpha-amidating lyase 2, isoform D	FBgn0262728	Pal2	CG5472	58.27	2e-159
AAEL005160			-0.573627	sulphate transporter	TRP	sulphate transporter [Source:VB Community Annotation]	sodium-independent sulfate anion transporter-like	N	epidermal stripes and patches, isoform A	FBgn0013953	Esp	CG7005	64.56	0
AAEL010893			-0.576026	carbonic anhydrase	DIV	carbonic anhydrase [Source:VB Community Annotation]	carbonic anhydrase	Y	carbonic anhydrase 2, isoform A	FBgn0027843	CAH2	CG6906	35.34	9e-50
AAEL005080			-0.577332	protein phosphatase D3	DIV	protein phosphatase-5 [Source:VB Community Annotation]	serine threonine- phosphatase 5	N	protein phosphatase D3, isoform B	FBgn0005777	PpD3	CG8402	69.13	0
AAEL013491			-0.580429	short-chain dehydrogenase	MET	short-chain dehydrogenase [Source:VB Community Annotation]	short-chain dehydrogenase	N	CG2064	FBgn0033205	CG2064	CG2064	56.36	1e-114
AAEL009899			-0.582213		UNK		conserved plasma membrane	N	uncharacterized protein CG13607, isoform A	FBgn0039151	CG13607	CG13607	52.19	2e-169
AAEL001940			-0.584701	Phosphatidate cytidylyltransferase	APO/MET	Phosphatidate cytidylyltransferase [Source:UniProtKB/TrEMBL;Acc:Q17JP6]	phosphatidate photoreceptor-specific-like	N	CDP diglyceride synthetase, isoform A	FBgn0010350	CdsA	CG7962	74.22	0
AAEL003766			-0.585397		DIV		neurofilament medium polypeptide-like	Y	uncharacterized protein CG14309	FBgn0038611	CG14309	CG14309	24.54	2e-43
AAEL013000			-0.585653	quick-to-court	UNK		AAEL013000-PA	N	quick-to-court, isoform H	FBgn0028572	qtc	CG14039	60.55	4e-159
AAEL000741			-0.587479	anterior open	RTT	ecdysone-induced protein 74EF (ETS transcription factor E74A) [Source:VB Community Annotation]	ecdysone-induced 74EF-like	N	anterior open, isoform A	FBgn0000097	aop	CG3166	42.59	8e-19
AAEL012847			-0.592413	forkhead box	RTT/APO	forkhead box, sub-group O, putative [Source:VB Community Annotation]	forkhead box O-like isoform X1	N	forkhead box, sub-group O, isoform F	FBgn0038197	foxo	CG3143	48.57	6e-90
AAEL007633			-0.59683	dihydropyrimidinase	MET	dihydropyrimidinase [Source:VB Community Annotation]	dihydropyrimidinase-like isoform X3	N	collapsin response mediator protein, isoform A	FBgn0023023	CRMP	CG1411	64.95	0
AAEL007777			-0.597065	vATPase sunbunit S1	DIV	vacuolar ATP synthase subunit S1 [Source:VB Community Annotation]	vacuolar H+-ATPase V0 sector accessory subunit S1	Y	vacuolar H[+] ATPase AC45 accessory subunit, isoform A	FBgn0262515	VhaAC45	CG8029	32.15	1e-44
AAEL003606			-0.597768	pur6	MET	purine biosynthesis protein 6, pur6 [Source:VB Community Annotation]	purine biosynthesis pur6	N	ade5, isoform B	FBgn0020513	ade5	CG3989	74.58	0
AAEL001607			-0.60023	galactose-1-phosphate uridylyltransferase	MET	Galactose-1-phosphate uridylyltransferase [Source:UniProtKB/TrEMBL;Acc:Q17KP5]	galactose-1-phosphate uridylyltransferase	N	Galactose-1-phosphate uridylyltransferase, isoform A	FBgn0263200	Galt	CG9232	70.03	0
AAEL005137			-0.600951	tetraspanin 74F	DIV	tetraspanin, putative [Source:VB Community Annotation]	tetraspanin-11-like	N	tetraspanin 74F, isoform A	FBgn0036769	Tsp74F	CG5492	65.13	1e-111
AAEL006696			-0.605668	lumbrokinase-3T2	IMM	lumbrokinase-3T2, putative [Source:VB Community Annotation]	venom serine protease 34	Y	uncharacterized protein CG30371	FBgn0050371	CG30371	CG30371	35.25	1e-65
AAEL018040			-0.606648		TRP		abc transporter	N	uncharacterized protein CG34120, isoform D	FBgn0083956	CG34120	CG34120	39.26	0
AAEL001515			-0.611014	Debcl2	APO	autophagy related gene DEBCL [Source:VB Community Annotation]	bcl-2-related ovarian killer -like	N	death executioner Bcl-2	FBgn0029131	Debcl	CG33134	55.94	1e-82
AAEL002309			-0.612532	TPX4	RSM	Thioredoxin Peroxidase. [Source:VB Community Annotation]	peroxiredoxin 6	N	uncharacterized protein CG12896	FBgn0033521	CG12896	CG12896	75	2e-121
AAEL011129			-0.612628	sorbitol dehydrogenase-2	MET	alcohol dehydrogenase [Source:VB Community Annotation]	sorbitol dehydrogenase-like	N	sorbitol dehydrogenase-2	FBgn0022359	Sodh-2	CG4649	51.94	7e-129
AAEL013215			-0.613676	sulfonylurea receptor	TRP	sulfonylurea receptor/ ABC transporter [Source:VB Community Annotation]	sulfonylurea receptor abc transporter	Y	sulfonylurea receptor	FBgn0028675	Sur	CG5772	42.4	0
AAEL005900			-0.614038		UNK		single-pass membrane and coiled-coil domain-containing 4 homolog	N	uncharacterized protein CG33169, isoform A	FBgn0053169	CG33169	CG33169	52.73	7e-14
AAEL014275			-0.617316	mosc	RSM	molybdopterin cofactor sulfurase (mosc) [Source:VB Community Annotation]	mitochondrial amidoxime-reducing component 1-like	N	CG1665	FBgn0033451	CG1665	CG1665	42.09	3e-65
AAEL009226			-0.619182	chitinase 10	PROT		flocculation FLO11-like	Y	chitinase 10, isoform C	FBgn0250907	Cht10	CG18140	39.73	8e-11
AAEL002592			-0.619645		UNK		possible HHH motif antimicrobial peptide	Y
AAEL014738			-0.623597	Caspar	IMM	FAS-associated factor 1, putative [Source:VB Community Annotation]	FAS-associated factor 1-like isoform X1	N	caspar, isoform B	FBgn0034068	casp	CG8400	42.8	0
AAEL006802			-0.623851	CYP9J22	RSM	cytochrome P450 [Source:VB Community Annotation]	probable cytochrome P450 9f2	N	Cyp9f2	FBgn0038037	Cyp9f2	CG11466	41.81	2e-137
AAEL010935			-0.624767	gamma glutamyl transpeptidases	MET	gamma glutamyl transpeptidases [Source:VB Community Annotation]	gamma-glutamyltranspeptidase 1-like isoform X5	N	uncharacterized protein CG17636, isoform A	FBgn0025837	CG17636	CG17636	48.74	2e-164
AAEL011193			-0.627197	steroid dehydrogenase	MET	steroid dehydrogenase [Source:VB Community Annotation]	inactive hydroxysteroid dehydrogenase 1	N	uncharacterized protein CG13284, isoform A	FBgn0032614	CG13284	CG13284	50.61	8e-113
AAEL014643			-0.628306	fringe connection	TRP	UDP-sugar transporter UST74c (fringe connection protein), putative [Source:VB Community Annotation]	UDP-sugar transporter UST74c	N	fringe connection, isoform A	FBgn0042641	frc	CG3874	69.12	2e-168
AAEL007274			-0.633871	DEAD box ATP-dependent RNA helicase	RTT	DEAD box ATP-dependent RNA helicase [Source:VB Community Annotation]	probable ATP-dependent RNA helicase DDX47	N	CG9253	FBgn0032919	CG9253	CG9253	69.84	0
AAEL009601			-0.638772	pyridoxal kinase	DIV	pyridoxine kinase [Source:VB Community Annotation]	pyridoxal kinase	N	pyridoxal kinase	FBgn0085484	Pdxk	CG34455	60.4	2e-126
AAEL009971			-0.639364		UNK		AAEL009971-PA	N	CG5726	FBgn0034313	CG5726	CG5726	36.86	7e-43
AAEL014422			-0.639499	synthrophin	DIV	syntrophin [Source:VB Community Annotation]	gamma-1-syntrophin-like isoform X1	N	Syntrophin-like 2, isoform E	FBgn0034135	Syn2	CG4905	83.37	0
AAEL014278			-0.639621	inaF-D	UNK		AAEL014278-PA	N	inaF-D	FBgn0260812	inaF-D	CG42563	55.77	5e-30
AAEL012409			-0.639627	panthotenate kinase	DIV	pantothenate kinase [Source:VB Community Annotation]	pantothenate kinase 3-like isoform X1	N	fumble, isoform B	FBgn0011205	fbl	CG5725	82.64	0
AAEL009538			-0.640221	crossveinless	DIV		twisted gastrulation	Y	crossveinless, isoform A	FBgn0000394	cv	CG12410	51.6	2e-87
AAEL000645			-0.641546	gonadal	UNK		gonadal gdl	Y	gonadal, isoform C	FBgn0028377	gdl-ORF39	CG33755	62.84	6e-77
AAEL013831			-0.647397	pyrroline-5-carboxylate dehydrogenase	MET	pyrroline-5-carboxylate dehydrogenase [Source:VB Community Annotation]	delta-1-pyrroline-5-carboxylate mitochondrial-like	N	delta-1-Pyrroline-5-carboxylate dehydrogenase 1, isoform D	FBgn0037138	P5CDh1	CG7145	76.58	0
AAEL014591			-0.647405	filamin	CS	filamin, putative [Source:VB Community Annotation]	filamin-B isoform X1	N	jitterbug, isoform F	FBgn0028371	jbug	CG30092	71.02	0
AAEL004930			-0.651597	carbonic anhydrase	DIV	carbonic anhydrase [Source:VB Community Annotation]	carbonic anhydrase	N	carbonic anhydrase 1	FBgn0027844	CAH1	CG7820	64.49	5e-133
AAEL008144			-0.653877	AMP dependent ligase	MET	AMP dependent ligase [Source:VB Community Annotation]	long-chain fatty acid transport 4	N	CG3394, isoform B	FBgn0034999	CG3394	CG3394	53.52	0
AAEL003107			-0.65663		UNK		gsg5 type	Y
AAEL007494			-0.660226	calcineurin b subunit	DIV	calcineurin b subunit [Source:VB Community Annotation]	calcineurin subunit B	N	ethanol sensitive with low memory, isoform A	FBgn0037358	elm	CG2185	84.66	4e-115
AAEL015014			-0.660269		UNK		transmembrane 135-like	N	uncharacterized protein CG11737, isoform A	FBgn0037592	CG11737	CG11737	46.62	9e-135
AAEL007941			-0.660861	triaglycerol lipase	BF	triacylglycerol lipase, putative [Source:VB Community Annotation]	salivary lipase	Y	CG1986, isoform A	FBgn0030162	CG1986	CG1986	34.35	3e-37
AAEL003405			-0.661475		CS		regulator of microtubule dynamics 1-like	N
AAEL004818			-0.662117		UNK		nucleolar complex 2 homolog	N	CG9246	FBgn0032925	CG9246	CG9246	47.05	0
AAEL006171			-0.664398	n-myc downstream regulated	UNK	n-myc downstream regulated [Source:VB Community Annotation]	PREDICTED: uncharacterized protein ZK1073.1-like isoform X2	N	CG2082, isoform C	FBgn0027608	CG2082	CG2082	75.22	0
AAEL009510			-0.673167	glucosamine-fructose-6-phosphate aminotransferase	MET	glucosamine-fructose-6-phosphate aminotransferase [Source:VB Community Annotation]	glucosamine-fructose-6-phosphate aminotransferase 2	N	Glutamine:fructose-6-phosphate aminotransferase 1, isoform D	FBgn0027341	Gfat1	CG12449	80.47	0
AAEL011088			-0.674958	Dat	DIV	dopamine N-acetyltransferase [Source:VB Community Annotation]	dopamine N-acetyltransferase-like isoform X2	N	dopamine N acetyltransferase, isoform B	FBgn0019643	Dat	CG3318	53.41	4e-94
AAEL017300			-0.676578	tyrosine kinase	DIV		tyrosine kinase	Y	Tie-like receptor tyrosine kinase	FBgn0014073	Tie	CG7525	61.39	2e-155
AAEL003889			-0.680535	GNBP2	IMM	Gram-Negative Binding Protein (GNBP) or Beta-1 3-Glucan Binding Protein (BGBP). [Source:VB Community Annotation]	beta-1,3-glucan-binding -like	Y	Gram-negative bacteria binding protein 2, isoform D	FBgn0040322	GNBP2	CG4144	29.24	2e-36
AAEL000749			-0.68148	fibrinogen A	IMM		fibrinogen A	Y	uncharacterized protein CG30281	FBgn0050281	CG30281	CG30281	38.43	2e-39
AAEL013304			-0.688873		TRP		ion channel regulatory unc-93	N	uncharacterized protein CG18549	FBgn0038053	CG18549	CG18549	57.34	2e-176
AAEL007136			-0.694668	sugar transporter	TRP	sugar transporter [Source:VB Community Annotation]	facilitated trehalose transporter Tret1-like	N	uncharacterized protein CG33281	FBgn0053281	CG33281	CG33281	33.04	4e-82
AAEL007705			-0.696119	hect E3 ubiquitin ligase	DIV	hect E3 ubiquitin ligase [Source:VB Community Annotation]	e3 ubiquitin- ligase	N	CG5604	FBgn0032208	CG5604	CG5604	62.1	0
AAEL018114			-0.69661		UNK		PREDICTED: uncharacterized protein LOC109416505	N	uncharacterized protein CG42663, isoform D	FBgn0261545	CG42663	CG42663	51.94	6e-118
AAEL003746			-0.699612	4-Hydroxybutyrate CoA-transferase	MET	4-Hydroxybutyrate CoA-transferase, putative [Source:VB Community Annotation]	4-Hydroxybutyrate -transferase	N	CG7920, isoform A	FBgn0039737	CG7920	CG7920	72.93	0
AAEL006085			-0.70121	pugilist	MET	methylenetetrahydrofolate dehydrogenase [Source:VB Community Annotation]	methylenetetrahydrofolate dehydrogenase methylenetetrahydrofolate	N	pugilist, isoform B	FBgn0020385	pug	CG4067	68.56	0
AAEL014893			-0.702368	CYP6BB2	RSM	cytochrome P450 [Source:VB Community Annotation]	cytochrome P450	N	Cyp6a14, isoform C	FBgn0033302	Cyp6a14	CG8687	46.02	2e-152
AAEL010219			-0.704183	sugar transporter	TRP	sugar transporter [Source:VB Community Annotation]	facilitated trehalose transporter Tret1-like	N	uncharacterized protein CG31100, isoform A	FBgn0051100	CG31100	CG31100	40.99	3e-75
AAEL010198			-0.706619	big bang	UNK		pdz domain-containing	N	big bang, isoform H	FBgn0087007	Bbg	CG42230	42.55	0
AAEL003457			-0.709394		UNK		conserved secreted precursor	Y
AAEL002046			-0.710648	CYP6CB1	RSM	cytochrome P450 [Source:VB Community Annotation]	cytochrome P450	Y	Cyp6a14, isoform C	FBgn0033302	Cyp6a14	CG8687	38.78	2e-112
AAEL004188			-0.712198		UNK		AAEL004188-PA, partial	N
AAEL006062			-0.717483	neutralized	DIV	neuralized [Source:VB Community Annotation]	notch signaling	N	neuralized, isoform A	FBgn0002932	neur	CG11988	48.95	0
AAEL004989			-0.723806	RNA-binding protein	RTT	RNA-binding protein [Source:VB Community Annotation]	RNA-binding 5	N	CG4896, isoform K	FBgn0031319	CG4896	CG4896	45.9	0
AAEL012518			-0.732918		DIV		low density lipo receptor adapter 1-A-like	N	CG4393, isoform B	FBgn0039075	CG4393	CG4393	27.52	7e-11
AAEL005740			-0.741026	AM dependent ligase	MET	AMP dependent ligase [Source:VB Community Annotation]	bubblegum-like very long-chain fatty acid coa synthetase	N	bubblegum, isoform A	FBgn0027348	bgm	CG4501	57.8	0
AAEL009634			-0.743039	steroid dehydrogenase	MET	steroid dehydrogenase [Source:VB Community Annotation]	very-long-chain 3-oxoacyl- reductase-like isoform X1	N	spidey	FBgn0029975	spidey	CG1444	53.44	2e-64
AAEL008898			-0.751648	sulfotransferase 1	MET	sulfotransferase (sult) [Source:VB Community Annotation]	sulfotransferase 1 family member D1-like	N	sulfotransferase 1	FBgn0034887	St1	CG5428	36.95	3e-66
AAEL015010			-0.75424	acetyl coenzyme A synthase	MET	acetyl-coa synthetase [Source:VB Community Annotation]	acetyl-coenzyme A synthetase-like	N	acetyl coenzyme A synthase, isoform A	FBgn0012034	AcCoAS	CG9390	81.89	0
AAEL008913			-0.756222	amino acid transporter	TRP	amino acid transporter [Source:VB Community Annotation]	amino acid transporter	N	CG7888, isoform B	FBgn0036116	CG7888	CG7888	67.65	0
AAEL013755			-0.76004	phosphorylase kinase, gamma	DIV	phosphorylase kinase, gamma [Source:VB Community Annotation]	phosphorylase b kinase gamma catalytic skeletal muscle heart isoform-like isoform X1	N	phosphorylase kinase gamma, isoform B	FBgn0011754	PhKgamma	CG1830	86.38	0
AAEL002688			-0.764103	glucosyl transferase	MET	glucosyl/glucuronosyl transferases [Source:VB Community Annotation]	2-hydroxyacylsphingosine 1-beta-galactosyltransferase-like	Y	uncharacterized protein CG17323, isoform A	FBgn0032713	CG17323	CG17323	55.11	0
AAEL015218			-0.765861	dnaJ 60	DIV		dnaJ 60	N	DnaJ-like-60, isoform C	FBgn0260770	CG42568	CG42568	38.12	2e-32
AAEL017460			-0.767127	angiotensin i-converting enzyme	BF	Angiotensin-converting enzyme [Source:UniProtKB/TrEMBL;Acc:A0A1S4G6D0]	angiotensin i-converting enzyme	Y	angiotensin converting enzyme, isoform B	FBgn0012037	Ance	CG8827	61.51	0
AAEL013532			-0.770069		UNK		salivary secreted	N
AAEL014053			-0.771604	vATPase	DIV	vacuolar proton ATPases [Source:VB Community Annotation]	V-type proton ATPase 116 kDa subunit a-like isoform X2	N	vacuolar H[+] ATPase 100kD subunit 2, isoform A	FBgn0028670	Vha100-2	CG18617	74.31	0
AAEL004597			-0.774509		UNK		kDa secreted	Y
AAEL012860			-0.782824		DIV		A Chain Crystal Structure Of Insect Arylalkylamine N- Acetyltransferase 7 From The Yellow Fever Mosquito Aedes Aegypt	N	uncharacterized protein CG13759, isoform A	FBgn0040376	CG13759	CG13759	26.01	4e-12
AAEL003694			-0.785852		UNK		AAEL003694-PA	N
AAEL002658			-0.790104	AMP dependent ligase	DIV	AMP dependent ligase [Source:VB Community Annotation]	4-coumarate-- ligase 1-like	N	uncharacterized protein CG11453	FBgn0038734	CG11453	CG11453	30.13	1e-53
AAEL002696			-0.792237		PROT		aminopeptidase N-like	Y	uncharacterized protein CG31343	FBgn0051343	CG31343	CG31343	25.1	2e-48
AAEL003655			-0.797061		UNK		AAEL003655-PA	N
AAEL012347			-0.798139		DIV		selenocysteine lyase cysteine desulfurase posttranslational	Y
AAEL005178			-0.800373	carboxylic ester hydrolase	MET	Carboxylic ester hydrolase (Fragment) [Source:UniProtKB/TrEMBL;Acc:Q17AV5]	venom carboxylesterase-6-like	Y	juvenile hormone esterase duplication	FBgn0034076	Jhedup	CG8424	42.7	3e-94
AAEL002737			-0.808754	cytochrome c oxidase subunit 7C	RSM	cytochrome c oxidase, subunit VIIC, putative [Source:VB Community Annotation]	cytochrome c oxidase subunit mitochondrial-like	N	cytochrome c oxidase subunit 7C, isoform B	FBgn0040773	COX7C	CG2249	52.24	1e-19
AAEL002463			-0.8088		UNK		AAEL002463-PA, partial	N
AAEL001194			-0.811135	FAS1	MET	fatty acid synthase [Source:VB Community Annotation]	fatty acid synthase-like	N	fatty acid synthase 1, isoform A	FBgn0283427	FASN1	CG3523	66.64	0
AAEL000556			-0.814968	CTL25	IMM	C-Type Lectin (CTL25) [Source:VB Community Annotation]	salivary C type lectin	Y	triforce, isoform C	FBgn0035199	tfc	CG9134	35.48	5e-21
AAEL003133			-0.816994		IMM		Ig-like and fibronectin type-III domain-containing	N	uncharacterized protein CG17839, isoform B	FBgn0036454	CG17839	CG17839	53.71	0
AAEL002892			-0.818915	protein kinase c	DIV	protein kinase c, mu [Source:VB Community Annotation]	serine threonine- kinase D1-like	N	protein kinase D, isoform D	FBgn0038603	PKD	CG7125	65.85	0
AAEL005256			-0.820064		DIV		lateral signaling target 2 homolog	N
AAEL015549			-0.825489	calcineurin b sunbunit	DIV	calcineurin b subunit [Source:VB Community Annotation]	calcineurin subunit B	N	ethanol sensitive with low memory, isoform A	FBgn0037358	elm	CG2185	84.34	6e-100
AAEL007226			-0.830484	nidogen	DIV	nidogen [Source:VB Community Annotation]	low-density lipo receptor	Y	Nidogen/entactin, isoform C	FBgn0026403	Ndg	CG12908	46.88	0
AAEL007372			-0.832552	GPRGBB1	DIV	GPCR GABA B Family [Source:VB Community Annotation]	gamma-aminobutyric acid type B receptor subunit 1	N	metabotropic GABA-B receptor subtype 1, isoform B	FBgn0260446	GABA-B-R1	CG15274	85.94	0
AAEL003057			-0.844167	allergen	UNK	allergen, putative [Source:VB Community Annotation]	salivary antigen 5 family 2	Y	CG9400	FBgn0030562	CG9400	CG9400	37.91	5e-33
AAEL006008			-0.845149	ubiquitin-protein ligase	APO	ubiquitin-protein ligase [Source:VB Community Annotation]	apoptosis-resistant E3 ubiquitin ligase 1-like isoform X2	Y	CG4238, isoform H	FBgn0031384	CG4238	CG4238	83.89	0
AAEL007127			-0.848722	leucine-rich repeat	IMM		leucine-rich repeat-containing 49	N	uncharacterized protein CG13708, isoform A	FBgn0035577	CG13708	CG13708	43.31	9e-119
AAEL005948			-0.869444		UNK		AAEL005948-PA	N
AAEL008879			-0.874428	kh	RSM	Kynurenine 3-monooxygenase (EC 1.14.13.9)(Kynurenine 3-hydroxylase) [Source:VB Community Annotation]	kynurenine 3-monooxygenase	N	cinnabar	FBgn0000337	cn	CG1555	61.48	0
AAEL010840			-0.878347		RSM		NADH dehydrogenase [ubiquinone] iron-sulfur mitochondrial-like	N
AAEL006479			-0.878511		UNK		AAEL006479-PA	Y
AAEL004096			-0.888265	aldo-keto reductase	RSM	aldo-keto reductase [Source:VB Community Annotation]	1,5-anhydro-D-fructose reductase-like	N	uncharacterized protein CG10638, isoform A	FBgn0036290	CG10638	CG10638	51.1	4e-110
AAEL008227			-0.892206	short-chain dehydrogenase	MET	short-chain dehydrogenase [Source:VB Community Annotation]	NADPH-dependent 1-acyldihydroxyacetone phosphate reductase-like	N	uncharacterized protein CG13377, isoform A	FBgn0261446	CG13377	CG13377	58.68	8e-125
AAEL010366			-0.893873	glucosyl transferase	MET	glucosyl/glucuronosyl transferases [Source:VB Community Annotation]	UDP-glucuronosyltransferase 1-1-like	N	Ugt86Dc	FBgn0040257	Ugt86Dc	CG4739	44.6	1e-130
AAEL011298			-0.902768		UNK		AAEL011298-PA	N
AAEL011094			-0.902928	junctophilin	DIV		junctophilin-1-like isoform X1	N	junctophilin, isoform B	FBgn0032129	jp	CG4405	69.98	0
AAEL007680			-0.906439		UNK		ciliogenesis-associated TTC17-interacting -like	N	uncharacterized protein CG13243, isoform A	FBgn0028903	CG13243	CG13243	24.12	7e-07
AAEL001429			-0.907581	amino acid transporter	TRP	amino acid transporter [Source:VB Community Annotation]	proton-coupled amino acid transporter CG1139	N	CG7888, isoform C	FBgn0036116	CG7888	CG7888	52.36	4e-159
AAEL000931			-0.910157	alkaline phosphatase	BF	Alkaline phosphatase [Source:UniProtKB/TrEMBL;Acc:Q1HQK7]	salivary alkaline phosphatase	Y	alkaline phosphatase 4, isoform A	FBgn0016123	Alp4	CG1462	50.89	2e-178
AAEL014199			-0.915106	suppressor of rudimentary	MET	dihydropyrimidine dehydrogenase [Source:VB Community Annotation]	dihydropyrimidine dehydrogenase [NADP(+)]-like	N	suppressor of rudimentary	FBgn0086450	su(r)	CG2194	73.33	0
AAEL011599			-0.916023	ADP-ribosylation factor	DIV	ADP-ribosylation factor, putative [Source:VB Community Annotation]	ADP-ribosylation factor 13B	N	uncharacterized protein CG11356	FBgn0030375	CG11356	CG11356	28.39	8e-21
AAEL006351			-0.918151	salivary mucin	BF		salivary mucin	Y	SET domain binding factor, isoform A	FBgn0025802	Sbf	CG6939	23.44	8.4
AAEL003878			-0.929137		DIV		rhoGEF domain-containing gxcI isoform X1	N	CG1806, isoform A	FBgn0030360	CG1806	CG1806	30.59	6e-18
AAEL005895			-0.930134	beta amyloid protein precursor-like	DIV		beta-amyloid isoform X1	N	beta amyloid protein precursor-like, isoform F	FBgn0000108	Appl	CG7727	63.81	0
AAEL010095			-0.940282		UNK		small integral membrane 14-like	N	uncharacterized protein CG13585, isoform B	FBgn0035020	CG13585	CG13585	43.04	2e-18
AAEL002583			-0.943429	TOLL7	IMM	Toll-like receptor [Source:VB Community Annotation]	toll-like receptor 7	Y	Toll-7	FBgn0034476	Toll-7	CG8595	63.08	0
AAEL013102			-0.950253	Rho guanine nucleotide exchange factor 2	DIV		guanine nucleotide exchange factor	N	Rho guanine nucleotide exchange factor 2, isoform H	FBgn0023172	RhoGEF2	CG9635	64	1e-22
AAEL014734			-0.957167	lysine ketoglutarate reductase/saccharopine dehydrogenase	RSM		lysine-ketoglutarate reductase saccharopine dehydrogenase	N	lysine ketoglutarate reductase/saccharopine dehydrogenase, isoform A	FBgn0025687	LKRSDH	CG7144	77.58	0
AAEL006733			-0.95717	FAD NADPH dehydrogenase	RSM	FAD NADPH dehydrogenase [Source:VB Community Annotation]	NADPH:adrenodoxin mitochondrial-like	N	defective in the avoidance of repellents	FBgn0015582	dare	CG12390	61.06	0
AAEL010075			-0.986642	oxidoreductase	RSM	oxidoreductase [Source:VB Community Annotation]	serine 3-dehydrogenase	N	CG9150	FBgn0031775	CG9150	CG9150	48.61	2e-88
AAEL005789			-0.992562		RTT		transcription activator mbf2	Y
AAEL008310			-1.00195		UNK		salivary basic peptide -1	Y
AAEL003631			-1.00522	CLIPB41	IMM	Clip-Domain Serine Protease family B. [Source:VB Community Annotation]	melanization protease 1-like	Y	CG9737	FBgn0039758	CG9737	CG9737	37.38	2e-81
AAEL007989			-1.01343		BF		AAEL007989-PA-mucin-like	Y
AAEL011305			-1.02643		UNK		AAEL011305-PA	N
AAEL018001			-1.03468		UNK		AGAP010799-PA	N
AAEL013555			-1.04092	CYP4J13	RSM	cytochrome P450 [Source:VB Community Annotation]	probable cytochrome P450 4ac1	N	Cyp4ac1	FBgn0031693	Cyp4ac1	CG14032	41.2	2e-123
AAEL000704			-1.09027	synaptotagmin	DIV	synaptotagmin, [Source:VB Community Annotation]	synaptic vesicle rabphilin-3a	N	synaptotagmin 1, isoform A	FBgn0004242	Syt1	CG3139	84.15	2e-158
AAEL005966			-1.09077		UNK		AAEL005966-PA	Y
AAEL011573			-1.0995	ankyrin	IMM		Ankyrin 2	N	ankyrin 2, isoform U	FBgn0261788	Ank2	CG42734	36.85	8e-136
AAEL014830			-1.10425	Cyp4ac1	RSM	cytochrome P450 [Source:VB Community Annotation]	probable cytochrome P450 4ac1	N	Cyp4ac1	FBgn0031693	Cyp4ac1	CG14032	41.61	5e-125
AAEL017956			-1.1164		UNK			N
AAEL015288			-1.13981		UNK		AAEL015288-PA	Y	uncharacterized protein CG14834	FBgn0035768	CG14834	CG14834	41.94	2e-10
AAEL017735			-1.15138		UNK			N
AAEL017657			-1.16437		UNK			N
AAEL004353			-1.16714	salivary mucin	BF		salivary mucin	Y
AAEL008444			-1.18123		UNK		salivary secreted peptide	Y
AAEL009108			-1.18424	protease m1 zinc metalloprotease	PROT	protease m1 zinc metalloprotease [Source:VB Community Annotation]	protease m1 zinc metalloprotease	Y	uncharacterized protein CG31233, isoform A	FBgn0051233	CG31233	CG31233	33.97	2e-163
AAEL012694			-1.24477	juvenile hormone-inducible protein	RTT	juvenile hormone-inducible protein, putative [Source:VB Community Annotation]	Juvenile hormone-inducible	N	CG2004, isoform A	FBgn0030060	CG2004	CG2004	25.7	3e-36
AAEL012110			-1.24897	protease m1 zinc metalloprotease	PROT	protease m1 zinc metalloprotease [Source:VB Community Annotation]	protease m1 zinc metalloprotease	Y	uncharacterized protein CG40470	FBgn0058470	CG40470	CG40470	45.96	0
AAEL008441			-1.25047		UNK		conserved secreted precursor	Y
AAEL009479			-1.26878	amino acid transporter	TRP	amino acid transporter [Source:VB Community Annotation]	proton-coupled amino acid transporter CG1139 isoform X2	N	uncharacterized protein CG16700	FBgn0030816	CG16700	CG16700	57.66	7e-162
AAEL006526			-1.27309	nicotinic acetylcholine receptor beta3	DIV	neurotransmitter gated ion channel [Source:VB Community Annotation]	acetylcholine receptor subunit alpha-like 1	Y	nicotinic acetylcholine receptor beta3	FBgn0031261	nAChRbeta3	CG11822	33	2e-71
AAEL018021			-1.2788	IA-2 protein tyrosine phosphatase	DIV		receptor-type tyrosine- phosphatase n2	N	IA-2 protein tyrosine phosphatase, isoform D	FBgn0031294	IA-2	CG31795	70.27	0
AAEL007006			-1.29259	CLIPA17	IMM	Clip-Domain Serine Protease family A. [Source:VB Community Annotation]	trypsin-like serine protease	Y	CG5390, isoform A	FBgn0032213	CG5390	CG5390	36.92	1e-70
AAEL010062			-1.30475		DIV		ecdysteroid kinase	N	CG5644	FBgn0035948	CG5644	CG5644	40	1e-98
AAEL007802			-1.32303	multicopper oxidase	DIV	multicopper oxidase [Source:VB Community Annotation]	multicopper oxidase	N	multicopper oxidase-1, isoform A	FBgn0032116	Mco1	CG3759	48.48	0
AAEL017612			-1.37997		UNK			N
AAEL017758			-1.44208		UNK			N
AAEL006259			-1.46045	GPROP2	DIV	long wavelength sensitive opsin [Source:VB Community Annotation]	deltamethrin resistance-associated NYD-OP1	N	rhodopsin 6	FBgn0019940	Rh6	CG5192	59.12	2e-153
AAEL002055			-1.52465	neuroendocrin protein 7b2	DIV	neuroendocrine protein 7b2 [Source:VB Community Annotation]	neuroendocrine 7b2	Y	7B2, isoform A	FBgn0041707	7B2	CG1168	43.49	9e-56
AAEL018218			-1.52954	ankyrin	IMM		ankyrin isoform AA	N	ankyrin 2, isoform AA	FBgn0261788	Ank2	CG42734	77.72	0
AAEL009966			-1.56962		UNK		AAEL009966-PA	N
AAEL012464			-1.63738	alanine-glyoxylate aminotransferase	MET	alanine-glyoxylate aminotransferase [Source:VB Community Annotation]	alanine-glyoxylate aminotransferase	N	CG8745	FBgn0036381	CG8745	CG8745	63.14	0
AAEL006498			-1.66901	GPROP1	DIV	long wavelength sensitive opsin [Source:VB Community Annotation]	AAEL006498-PA	N	rhodopsin 6	FBgn0019940	Rh6	CG5192	60.11	5e-158
AAEL000124			-2.74655	Odorant-binding protein 58c	BF		odorant binding	Y	Odorant-binding protein 58c	FBgn0034769	Obp58c	CG13524	32	4e-07
